1 **IPMK physically binds to the SWI/SNF complex and modulates BRG1 occupancy**

2

3

4 Jiyeon Beon<sup>1,†</sup>, Sungwook Han<sup>1,†</sup>, Seung Eun Park<sup>1</sup>, Kwangbeom Hyun<sup>1</sup>, Song-Yi Lee<sup>2</sup>, Hyun-Woo Rhee<sup>2</sup>,  
5 Jeong Kon Seo<sup>3</sup>, Jaehoon Kim<sup>1</sup>, Seyun Kim<sup>1,4,\*</sup>, Daeyoup Lee<sup>1,\*</sup>

6 <sup>1</sup> Department of Biological Sciences, Korea Advanced Institute of Science and Technology (KAIST),  
7 Daejeon, 34141, Korea.

8 <sup>2</sup> Department of Chemistry, Seoul National University, Seoul, 08826, Korea.

9 <sup>3</sup> UNIST Central Research Facilities (UCRF), Ulsan National Institute of Science and Technology (UNIST),  
10 Ulsan 44919, Korea.

11 <sup>4</sup> KAIST Institute for the BioCentury, KAIST, Daejeon 34141, Korea.

12

13 \*To whom correspondence should be addressed. Tel: +82 42 350 2623; Fax: +82 42 350 2610; Email:  
14 [seyunkim@kaist.ac.kr](mailto:seyunkim@kaist.ac.kr) (S.K.), [daeyoup@kaist.ac.kr](mailto:daeyoup@kaist.ac.kr) (D.L.).

15

16 † These authors contributed equally.

17

18

19 **ABSTRACT**

20 Inositol polyphosphate multikinase (IPMK), a key enzyme in the inositol polyphosphate (IP)  
21 metabolism, is a pleiotropic signaling factor involved in major biological events including transcriptional  
22 control. In yeasts, IPMK and its IP products were known to promote the activity of SWI/SNF chromatin  
23 remodeling complex, which plays a critical role in gene expression by regulating chromatin accessibility.  
24 However, the direct linkage between IPMK and chromatin remodelers remains unclear, raising a question  
25 on how IPMK contributes to the transcriptional regulation in mammals. By employing unbiased screenings  
26 and in vivo/in vitro immunoprecipitations, here we demonstrated that IPMK physically associates with  
27 native mammalian SWI/SNF complexes by directly binding to SMARCB1, BRG1, and SMARCC1.  
28 Furthermore, we identified the specific domains required for the IPMK-SMARCB1 binding. Notably, using  
29 CUT&RUN and ATAC-seq assays, we discovered that IPMK co-localizes with BRG1 and regulates BRG1  
30 localization as well as BRG1-mediated chromatin accessibility in a genome-wide manner (including  
31 promoter-TSS) in mouse embryonic stem cells. Finally, our mRNA-seq analyses revealed that IPMK and  
32 SMARCB1 regulate common gene sets, validating a functional link between IPMK and SWI/SNF complex.  
33 Together, these findings establish an importance of IPMK in promoter targeting of the SWI/SNF complex,  
34 thereby contributing to SWI/SNF-mediated chromatin accessibility and transcription.

## 35 INTRODUCTION

36 Inositol polyphosphates are a class of signaling messengers that mediate diverse biological events such  
37 as cellular growth, proliferation, and metabolic homeostasis. Inositol polyphosphate multikinase (IPMK)  
38 is an essential enzyme for the synthesis of these inositol polyphosphates including inositol  
39 tetrakisphosphates (IP<sub>4</sub>, both Ins(1,3,4,5)P<sub>4</sub> and Ins(1,4,5,6)P<sub>4</sub>) and pentakisphosphates (IP<sub>5</sub>,  
40 Ins(1,3,4,5,6)P<sub>5</sub>) (Chakraborty, Kim, & Snyder, 2011; Hatch & York, 2010; Saiardi, Erdjument-Bromage,  
41 Snowman, Tempst, & Snyder, 1999). In addition to its role as a phosphatidylinositol 3-kinase (thereby  
42 producing phosphatidylinositol 3,4,5-trisphosphate (PIP<sub>3</sub>)), IPMK also non-catalytically controls various  
43 signaling factors including the mammalian target of rapamycin (mTOR), AMP-activated protein kinase  
44 (AMPK), and TRAF6 (Bang et al., 2012; E. Kim, Ahn, Kim, Lee, & Kim, 2017; E. Kim, Beon, et al., 2017;  
45 S. Kim et al., 2011; Maag et al., 2011; Resnick et al., 2005). These findings suggest that IPMK plays a  
46 critical role in coordinating the major biological events.

47 Increasing evidence strongly indicates that nuclear IPMK act as a key factor in gene expression  
48 regulation. IPMK was originally cloned from yeast as Arg82 (yeast IPMK), a gene required for the  
49 regulation of arginine metabolism (Bechet, Greenson, & Wiame, 1970; Dubois, Bercy, & Messenguy, 1987;  
50 Odom, Stahlberg, Wentz, & York, 2000). The physical interaction between Arg82 and the yeast  
51 transcription factor MCM1, a yeast homolog of the mammalian serum response factor (SRF), is crucial for  
52 the transcriptional control (Bercy, Dubois, & Messenguy, 1987; Christ & Tye, 1991; Messenguy & Dubois,  
53 1993; Odom et al., 2000). In mammals, IPMK-SRF binding was found to be a critical event for SRF-  
54 dependent gene induction (E. Kim et al., 2013). Furthermore, other functions of nuclear IPMK are mediated  
55 by its diverse interactions with p53, steroidogenic factor 1, and CBP/p300 (Blind, 2014; Blind et al., 2014;  
56 Malabanan & Blind, 2016; Xu, Paul, et al., 2013; Xu, Sen, et al., 2013; Xu & Snyder, 2013).

57 Chromatin remodeling is essential for the efficient transcription of eukaryotic genes (Kouzarides, 2007;  
58 Trotter & Archer, 2007; Vignali, Hassan, Neely, & Workman, 2000). Particularly, SWI/SNF is a large family  
59 of ATP-dependent chromatin remodeling complexes that have been characterized as transcriptional  
60 activators or repressors. These complexes enable the transcription machinery or other transcription factors  
61 to gain access to their target genes (Arnaud, Le Loarer, & Tirode, 2018; Hargreaves & Crabtree, 2011). In  
62 mammalian cells, the canonical SWI/SNF complex contains one of the two mutually exclusive ATPases,  
63 BRM (SMARCA2) or BRG1 (SMARCA4), in addition to a core set of subunits consisting of BAF155  
64 (BRG1-associated factor or SMARCC1), SMARCB1 (hSNF5 or INI1), and BAF170 (SMARCC2), as well  
65 as four to eight other accessory subunits (Khavari, Peterson, Tamkun, Mendel, & Crabtree, 1993; W. Wang,  
66 Côté, et al., 1996; W. Wang, Xue, et al., 1996). Importantly, this SWI/SNF complex mediates nucleosome  
67 structure modifications and regulates the positioning of nucleosomes in an ATP-dependent manner, thereby  
68 modulating the accessibility of regulatory proteins. Therefore, the SWI/SNF chromatin remodeling  
69 complex is critical for various biological processes, including gene transcription, cell cycle regulation, and  
70 cell differentiation (Ho, Jothi, et al., 2009; Ho, Ronan, et al., 2009; Hodges, Kirkland, & Crabtree, 2016;  
71 K. H. Kim & Roberts, 2014; Tolstorukov et al., 2013; X. Wang, Haswell, & Roberts, 2014).

72 Despite the importance of both inositol polyphosphates and chromatin remodeling in transcriptional  
73 regulation, only a few studies have addressed the linkage between inositol polyphosphates and chromatin  
74 remodeling. Previous study in yeasts demonstrated that inositol polyphosphates could regulate the  
75 nucleosome-sliding activity of chromatin remodeling complexes *in vitro* (Shen, Xiao, Ranallo, Wu, & Wu,  
76 2003). Specifically, inositol tetrakisphosphates and pentakisphosphates (IP<sub>4</sub> and IP<sub>5</sub>) stimulate the activity  
77 of the SWI/SNF complex, whereas inositol hexakisphosphate (IP<sub>6</sub>) inhibits the activity of NURF, ISW2,  
78 and INO80 complexes. Another study in yeast illustrated that Arg82 (i.e., a yeast IPMK) mutation which  
79 led to defective IP<sub>4</sub> and IP<sub>5</sub> production, causes inefficient recruitment of the SWI/SNF complex, resulting  
80 in impaired chromatin remodeling at the phosphate-responsive *PHO5* gene promoter (Steger, Haswell,  
81 Miller, Went, & O'Shea, 2003). In mammals, inositol hexakisphosphate kinase 1 (IP6K1) was recently  
82 found to directly interact with Jumonji domain containing 2C (JMJD2C), a histone demethylase. IP6K1  
83 and its product, 5-IP<sub>7</sub>, appear to mediate JMJD2C-target gene expression in mammalian cells via regulating  
84 the chromatin association of JMJD2C and levels of trimethyl-histone H3 lysine 9 (Burton, Azevedo,  
85 Andreassi, Riccio, & Saiardi, 2013). Taken together, these findings suggest that inositol polyphosphates  
86 and their enzymes play an important role in chromatin remodeling and transcription. However, direct  
87 linkages between IPMK (which produces inositol polyphosphate) and the chromatin remodeling complex  
88 SWI/SNF have not been previously reported, and it is still unclear whether IPMK contributes the  
89 transcriptional regulation of mammals.

90 To address these issues, we first performed unbiased screening assays and elucidated that the core  
91 subunits of the SWI/SNF complex, including SMARCB1 and BRG1, physically interact with IPMK. The  
92 physical association between IPMK and SWI/SNF complex was confirmed by our *in vitro* and *in vivo*  
93 immunoprecipitation assays. Furthermore, the specific binding sites between IPMK and SMARCB1 were  
94 mapped in detail. To investigate the biological role of IPMK-SWI/SNF complex binding, we performed  
95 various next-generation sequencing. We detected that IPMK and BRG1 were co-localized at the chromatin,  
96 especially at the promoter-TSS. Surprisingly, we found that IPMK depletion significantly reduced the  
97 global BRG1 occupancy and BRG1-mediated chromatin accessibility, especially at the bivalent promoters.  
98 The IPMK depletion also affected the transcription of genes with the reduced BRG1 occupancy and  
99 chromatin accessibility at their promoter-TSS. Lastly, we identified that IPMK and SMARCB1 regulate the  
100 common set of genes in the same manner. Taken together, our findings demonstrate the direct linkage  
101 between IPMK and the SWI/SNF complex (both physical and functional interactions), as well as the crucial  
102 role of IPMK in regulating BRG1 occupancy, BRG1-associated chromatin accessibility, and transcription.  
103

## 104 RESULTS

### 105 Identification of IPMK-binding/interacting proteins

106 To investigate putative IPMK targets, we performed yeast two-hybrid screenings using IPMK as a bait  
107 and a human brain cDNA library as prey. The co-transformants of GAL4-DB fusion plasmid pGBKT7-  
108 IPMK (prey) and GAL4-AD fusion plasmid pACT2-SMARCB1 (bait) resulted in reporter gene activation,  
109 thus demonstrating cell growth on selective mediums, whereas co-transformants of pGBKT-7 and pACT2-  
110 SMARCB1 did not grow (Figure 1A). Approximately 23-36 proteins were identified as potential targets  
111 interacting with IPMK (Supplementary Table 1). Among these putative targets, only SMARCB1 was  
112 present in both duplicates of the yeast two-hybrid screening (Supplementary Table 1). These results indicate  
113 SMARCB1, a core subunit of SWI/SNF chromatin remodeler, as a potential candidate for IPMK-binding  
114 proteins.

115 To further identify potential target proteins associating with IPMK in mammalian cells, we performed  
116 an *in vivo* proximity-labeling approach using an engineered variant of ascorbate peroxidase (APEX2) fused  
117 to IPMK (APEX2-mediated proximity labeling). The IPMK-APEX2 or APEX2 neighboring proteins were  
118 biotinylated, enriched with streptavidin beads, and analyzed via mass spectrometry (Figure 1B). A total of  
119 455 IPMK-associated candidate proteins was identified by comparing neighboring proteins of APEX2-  
120 IPMK with those of APEX2 only (background, used as a negative control) using two-fold enrichment score  
121 differences. Interestingly, by performing ConsensusPathDB (Herwig, Hardt, Lienhard, & Kamburov, 2016)  
122 using the IPMK-associated candidates, we detected the enriched protein complex-based sets related to  
123 BRG1-, BAF-, or SWI/SNF complex-associated complexes (Supplementary Table 2). Notably, among  
124 these candidates, we detected SWI/SNF complex-associated factors, including SMARCB1 (BAF47),  
125 BRG1 (SMARCA4), SMARCC2 (BAF170), ARID1A (BAF250A), PBRM1 (BAF180), and SMARCC1  
126 (BAF155), as IPMK-proximal/binding target proteins (Figure 1C). Furthermore, among these SWI/SNF  
127 complex subunits, we found that SMARCB1 most significantly interacts with or being proximal to IPMK  
128 (Figure 1C), consistent with the yeast two-hybrid screening results (Figure 1A). Intriguingly, we also  
129 detected core histones (histone H2B, H3.1, and H4) as IPMK-proximal/binding targets (Figure 1—figure  
130 supplement 1), supporting that IPMK binds/proximal with SWI/SNF complex, which binds to nucleosomes  
131 *in vivo*. Collectively, these results from two unbiased screening experiments (including yeast two-hybrid  
132 screening assay and APEX2-mediated proximity-labeling-based proteomics) strongly indicate that IPMK  
133 physically associates with the SWI/SNF complex.

134

### 135 Physical interaction between IPMK and core subunits of SWI/SNF complex

136 To confirm the physical interaction between IPMK and SMARCB1, we first performed an *in vitro*  
137 binding assay using recombinant IPMK and SMARCB1 proteins. Notably, we detected a direct protein-  
138 protein interaction between IPMK and SMARCB1 *in vitro* (Figure 2A, see lane 2 and lane 4). To confirm  
139 the physical association between IPMK and core subunits of SWI/SNF (BAF) complex, we performed

140 binary protein interactions assays with baculovirus-mediated expression. We co-infected Sf9 insect cells  
141 with baculoviruses expressing FLAG-IPMK and untagged individual subunits of SWI/SNF complex,  
142 including SMARCB1, BRG1, BAF155 (SMARCC1), and BAF170 (SMARCC2). Then, we performed  
143 FLAG M2 agarose immunoprecipitation and immunoblotting. Importantly, we detected direct protein-  
144 protein interactions between IPMK-SMARCB1, IPMK-BRG1, and IPMK-BAF155 *in vitro*, while we did  
145 not detect IPMK-BAF170 interactions (Figure 2B, see lane 7 and lane 8). Together, these results indicate  
146 that IPMK directly/individually binds to SMARCB1, BRG1, and BAF155 *in vitro*.

147 To investigate whether these IPMK-SMARCB1/BRG1/BAF155 interactions also occurred *in vivo*, we  
148 performed co-immunoprecipitation experiments using mammalian cells. Importantly, we detected a direct  
149 association of endogenous IPMK and SMARCB1 in mouse embryonic stem cells (mESCs) (Figure 2C and  
150 D) and in mouse embryonic fibroblasts (MEFs) (Figure 2—figure supplement 1A–C). Consistent with our  
151 *in vitro* binding assays (Figure 2A and B), we detected SMARCB1, BRG1, and BAF155 in endogenous  
152 IPMK immunoprecipitates (Figure 2C) and FLAG-IPMK overexpressed immunoprecipitates (Figure 2E)  
153 in mESCs. Intriguingly, we detected SMARCB1, BRG1, and BAF170 in endogenous IPMK  
154 immunoprecipitates in MEFs (Figure 2—figure supplement 1A and B). To determine the specificity of the  
155 IPMK-SMARCB1 physical interaction, RNAi-mediated knockdown of *Ipmk* (*Ipmk*KD) and *Smarcb1*  
156 (*Smarcb1*KD) was conducted in mESCs and MEFs. We first confirmed the successful knockdown of both  
157 *Ipmk* and *Smarcb1* by quantifying the protein levels (Figure 2F, Figure 2—figure supplement 1D and E).  
158 In addition, we observed that *Ipmk* knockdown did not affect the protein levels of SWI/SNF complex  
159 subunits, and *Smarcb1* knockdown did not affect the protein levels of IPMK both in mESCs and MEFs  
160 (Figure 2—figure supplement 1D). Importantly, in IPMK immunoprecipitates, a significant reduction in  
161 SMARCB1 signals was observed in *Ipmk*KD mESCs compared to the control (*Egfp*KD) mESCs (Figure  
162 2F). We also found that SMARCB1 and BRG1 signals in IPMK immunoprecipitates were significantly  
163 decreased upon *Smarcb1*KD MEFs compared to the control (*Egfp*KD) MEFs (Figure 2—figure supplement  
164 1E). Lastly, in SMARCB1 immunoprecipitates, a significant reduction of IPMK signals was detected in  
165 IPMK-null MEFs (Figure 2—figure supplement 1C). Together, these results indicate that IPMK directly  
166 associates with the core subunits of SWI/SNF complex *in vivo* (IPMK-SMARCB1/BRG1/BAF155 in  
167 mESCs; IPMK-SMARCB1/BRG1/BAF170 in MEFs; IPMK-SMARCB1 binding is specific and observed  
168 both in mESCs and MEFs).

169 Considering our previous results (unbiased screenings, *in vitro*, and *in vivo* immunoprecipitation assays),  
170 it is highly plausible that IPMK physically associates with SWI/SNF complex. To confirm this, we first  
171 performed a co-immunoprecipitation assay by overexpressing IPMK and SMARCB1 in human embryonic  
172 kidney (HEK)-293T cells. Consistently, we observed a physical interaction between IPMK and SMARCB1  
173 (Figure 2—figure supplement 1F). Next, we performed GST (-IPMK) pull-down assays by overexpressing  
174 GST-IPMK or GST alone in HEK293T cells. Notably, compared to GST alone, we detected core subunits  
175 of SWI/SNF (BAF)/PBAF complexes, including SMARCB1, BAF155, BAF170, PBRM1, BAF250A, and  
176 BRM, in GST-IPMK pulled-down samples (Figure 2—figure supplement 1G), as consistent with our  
177 APEX2-mediated proximity labeling assays (Figure 1C). Lastly, we purified native SWI/SNF (BAF)

178 complexes from FLAG-DPF2 cell lines (Figure 2—figure supplement 1H), co-incubated the purified native  
179 SWI/SNF complexes, and purified GST-IPMK or GST alone, then performed GST pull-down assays. As  
180 expected, we detected the core subunits of SWI/SNF complexes (including SMARCB1, BRG1, BAF155,  
181 and BAF170) in GST-IPMK pulled-down samples (Figure 2—figure supplement 1I). Collectively, our  
182 combined results (unbiased screenings, *in vitro/in vivo* immunoprecipitation, and *in vitro* pull-down assays)  
183 strongly imply that IPMK physically associates with mammalian SWI/SNF complexes by directly binds to  
184 SMARCB1, BRG1, and BAF155 (SMARCC1).

185

### 186 **Mapping the reciprocal binding sites of IPMK and SMARCB1**

187 Among three IPMK-binding proteins (SMARCB1, BRG1, and BAF155), SMARCB1 exhibited the  
188 most robust interaction with IPMK (Figure 1 and 2). Regarding this, we conducted yeast two-hybrid assays  
189 to identify the specific binding domains of SMARCB1 required for interacting with IPMK. Various prey  
190 vectors encoding different SMARCB1 domains were cloned, and two-hybrid analyses were performed.  
191 Interestingly, the prey vectors expressing amino acids of 99-245, 99-319, and full-length SMARCB1  
192 showed positive signals in the two-hybrid system (Figure 3—figure supplement 1A), indicating that the  
193 Rpt1 and Rpt2 domains of SMARCB1 participate in the protein-protein interactions of SMARCB1 and  
194 IPMK.

195 To further dissect the reciprocal binding sites required for SMARCB1-IPMK physical binding, various  
196 SMARCB1 constructs were designed and overexpressed in HEK293T cells. Based on the domain map of  
197 SMARCB1 (Figure 3A, top), we first designed SMARCB1 constructs with C-terminal deletion (Figure 3A,  
198 middle). We confirmed that the Rpt1 domain of SMARCB1 is essential for IPMK interaction by  
199 immunoprecipitating the overexpressed deletion constructs (Figure 3B, compare lane 3 to lane 2, 4, and 5).  
200 We then generated additional N-terminal deleted constructs of SMARCB1 (Figure 3A, bottom). Consistent  
201 with the results of yeast two-hybrid assays (Figure 3—figure supplement 1A), we observed that the  
202 constructs containing the Rpt1 or Rpt2 domains associate with IPMK (Figure 3C, lanes 2, 3, 4, and 5 show  
203 positive immunoblotting signals). By independently overexpressing each SMARCB1 domain, we found  
204 that both the Rpt1 and Rpt2 domains of SMARCB1 could bind to IPMK (Figure 3D and E, see lane 3, 4,  
205 and 6). Additionally, we dissected Rpt1 and Rpt2 domains into  $\beta$  sheets and  $\alpha$  helices based on their  
206 structures. In Rpt1, two  $\beta$  sheets and two helices are required for IPMK-binding (Figure 3—figure  
207 supplement 1B, compare lane 4 to lane 2 and 3). In Rpt2, only two  $\beta$  sheets but not  $\alpha$  helices were bound  
208 to IPMK (Figure 3—figure supplement 1C, compare lane 2 and lane 3). These observations (for IPMK-  
209 binding, both sheets and helices of Rpt1 or/and only sheets of Rpt2 are required) were supported by  
210 overexpressing combinations of Rpt1 and Rpt2 domains (Figure 3—figure supplement 1D, lanes 3 and 4  
211 show positive signals). Lastly, this was further confirmed by the fact that SMARCB1 lacking Rpt1 and  
212 Rpt2 could not bind to IPMK (Figure 3—figure supplement 1E, compare lane 2 and lane3, and S3F). Taken  
213 together, we concluded that the sheets/helices of Rpt1 and sheets of Rpt2 are the major IPMK interacting  
214 sites in SMARCB1.

215 Reciprocally, to identify which IPMK domains are required for SMARCB1 binding, we designed  
216 several GST-tagged constructs of IPMK (Figure 3G) and conducted immunoprecipitation experiments.  
217 Intriguingly, we found that IPMK-SMARCB1 binding was primarily mediated by three IPMK regions,  
218 including exon 3, exon 4, and exon 6 (Figure 3F, lanes 4, 5, 7, and 8 show positive signals, and 3G), which  
219 comprises the inositol binding site and the kinase domain. Taken together, our results elucidated the specific  
220 reciprocal binding sites of IPMK-SMARCB1 interaction.

221

## 222 **Co-localization of IPMK and BRG1**

223 Our results demonstrated that IPMK directly binds to the core subunits of mammalian SWI/SNF  
224 complexes (SMARCB1, BRG1, and BAF155) and physically associates with native SWI/SNF complexes.  
225 Regarding this, one can speculate that IPMK may play an important role in chromatin regulation. However,  
226 the region where this IPMK-SWI/SNF interaction occurs *in vivo* and the detailed localization and the role  
227 of IPMK in the chromatin remains elusive. To decipher these issues, we first conducted a chromatin  
228 fractionation assay using mESCs and MEFs. Notably, we found that IPMK is evenly distributed in all three  
229 fractions (cytoplasm, nucleoplasm, and chromatin), whereas SMARCB1 and BRG1 primarily reside in the  
230 chromatin fraction both in mESCs and MEFs (Figure 4A and Figure 4—figure supplement 1A-C). To  
231 further investigate whether IPMK and SMARCB1 expressions affect each other's distribution, RNAi-  
232 mediated knockdown of *Ipmk* (*IpmkKD*) and *Smrbc1* (*Smrbc1KD*) was conducted before the chromatin  
233 fractionation assay. We observed that the distribution of SMARCB1 was unaffected by *IpmkKD* (Figure  
234 4A), and the distribution of IPMK was unaffected by *Smrbc1KD* (Figure 4—figure supplement 1C).  
235 Together, these results indicate that IPMK, BRG1, and SMARCB1 reside together in the chromatin.

236 We then sought to determine where this event (IPMK, BRG1, and SMARCB1 localizing at the  
237 chromatin) takes place within the chromatin. To investigate the localization of BRG1 and IPMK within the  
238 chromatin, we performed CUT&RUN (cleavage under targets and release using nuclease) assays (Skene &  
239 Henikoff, 2017) in mESCs. In accordance with our results of the IPMK-SWI/SNF complex's physical  
240 association, we found that IPMK was co-localized with BRG1 in a genome-wide manner (Figure 4B and  
241 C). Next, we performed peak annotation to analyze the genomic regions (e.g., promoters or intergenic  
242 regions) enriched with CUT&RUN peaks. Given that BRG1, a catalytic subunit of the SWI/SNF complex,  
243 is known to localize at the promoter-transcription start site (TSS) (de Dieuleveult et al., 2016), we  
244 confirmed that BRG1 was significantly enriched at promoters of the mouse genome (Figure 4D and E).  
245 Notably, we detected that IPMK was also significantly enriched at promoters (Figure 4D and E).  
246 Collectively, these results strongly indicate that IPMK and BRG1 are co-localized at the chromatin,  
247 particularly at the promoter region, which further support our previous results of physical association  
248 between IPMK and SWI/SNF complex.

249

## 250 **IPMK regulates the BRG1 occupancy and impacts the BRG1-mediated chromatin accessibility**

251 To further elucidate the role of IPMK in BRG1 localization, we performed BRG1 CUT&RUN assays

252 upon *Ipmk*KD and compared them to *Egfp*KD (control) in mESCs. Interestingly, we observed a decreased  
253 BRG1 occupancy upon *Ipmk*KD at specific promoter-TSS regions with enriched IPMK (Figure 4B and F).  
254 Strikingly, we found that the genome-wide BRG1 localization was severely disrupted (decreased BRG1  
255 occupancy) upon *Ipmk*KD at BRG1 CUT&RUN peaks with low BRG1 enrichment in *Egfp*KD mESCs  
256 (bottom half of the heatmaps, termed as Low) (Figure 4C, G, and H). In addition, we detected that BRG1  
257 CUT&RUN peaks' genomic distributions were unaffected by *Ipmk*KD (Figure 4D and E), suggesting that  
258 *Ipmk*KD do not affect the global distribution (changes in peak positions) of BRG1 but impacts the global  
259 occupancy of BRG1.

260 It is previously known that BRG1 regulates chromatin accessibility at NFR (nucleosome free regions)  
261 of TSS in mESCs (de Dieuleveult et al., 2016). To investigate the effect of *Ipmk*KD-induced decreased  
262 BRG1 occupancy on chromatin accessibility, we performed ATAC-seq (assay for transposase-accessible  
263 chromatin using sequencing) upon *Ipmk*KD and compared them to *Egfp*KD (control) in mESCs. Notably,  
264 we observed that both ATAC-seq signals and BRG1 occupancy were reduced upon *Ipmk*KD at promoter-  
265 TSS regions of *Nanog* (Figure 4F). Furthermore, we observed some discrepancies in major peak positions  
266 when comparing BRG1 CUT&RUN peaks (*Egfp*KD, termed as BRG1 peaks) and ATAC-seq peaks  
267 (*Egfp*KD, termed as ATAC peaks) (Figure 4F). To precisely assess the effect of *Ipmk*KD-induced decreased  
268 BRG1 occupancy on chromatin accessibility, we assigned ATAC peaks to the nearby (within 2kb) BRG1  
269 peaks and selected these BRG1 peaks for further analysis (we excluded BRG1 peaks without nearby ATAC  
270 peaks) (Figure G). In addition, BRG1 peaks containing or assigned with multiple ATAC peaks were  
271 included without deduplication to match the same ordering as ATAC peaks (the same ordering – alignment  
272 of heatmaps' row – was applied for BRG1 and ATAC peaks in Figure 4G). As expected, we observed that  
273 the global BRG1 occupancy was reduced upon *Ipmk*KD at BRG1 peaks with low BRG1 intensity (bottom  
274 half of the heatmaps, termed as Low) (Figure G and H), consistent with our previous observations (Figure  
275 4C). Surprisingly, at Low BRG1 peaks (Low), we observed that both BRG1 occupancy and BRG1-  
276 mediated chromatin accessibility (ATAC-seq signals closest to the BRG1 CUT&RUN peaks) were  
277 significantly reduced upon *Ipmk*KD in a genome-wide manner (Figure 4G and H). Furthermore, the reduced  
278 BRG1 and BRG1-associated chromatin accessibility (ATAC-seq) upon *Ipmk*KD were also detected at  
279 promoter-TSS regions (Figure 4I), consistent with the previous study (BRG1 primarily maintains chromatin  
280 accessibility at promoter-TSS regions) (de Dieuleveult et al., 2016). Taken together, these results indicate  
281 that IPMK regulates the global BRG1 occupancy and corresponding BRG1-mediated chromatin  
282 accessibility in mESCs.

283

#### 284 **IPMK plays an important role in BRG1 localization and chromatin accessibility at promoter-TSS**

285 We next focused on the promoter-TSS regions, where BRG1 and IPMK were significantly enriched  
286 (Figure 4D and E). To further dissect the genome-widely decreased BRG1 occupancy upon *Ipmk*KD, we  
287 classified the distinct clusters of promoter-TSS based on the promoter types and changes in BRG1 intensity  
288 at defined regions relative to TSS positions (Figure 5C-G). Initially, by analyzing MNase-seq (chromatin  
289 digestion with micrococcal nuclease combined with sequencing) and ATAC-seq data in mESCs (*Egfp*KD),



290 we observed nucleosome-depleted/chromatin accessible regions, known as NFR (nucleosome free regions),  
291 and detected -1 and +1 nucleosomes near TSS (Figure 5A, left). We also confirmed that BRG1 was  
292 abundant at TSS by analyzing BRG1 CUT&RUN assays (Figure 5A, left). Based on the signal intensity of  
293 ChIP-seq (chromatin immunoprecipitation sequencing) against histone H3K4me3 and H3K27me3, we  
294 classified promoters into three types: H3K4me3-Low, H3K4me3-Only (high H3K4me3, low H3K27me3),  
295 and Bivalent (high H3K4me3, high H3K27me3). Considering nucleosome intensity and ATAC-seq signals,  
296 we detected that chromatin was highly accessible in H3K4me3-Only, moderately accessible in bivalent,  
297 and inaccessible in H3K4me3-Low promoters (Figure 5A, right). Next, we categorized the 9,042 TSS with  
298 decreased BRG1 occupancy upon *IpmkKD* (1.5 fold changes in BRG1 occupancy compared to *EgfpKD*,  
299 see also Figure 5D, left Total) into the three promoter types (Figure 5B). Since our goal was to examine the  
300 *IpmkKD*-induced 'decreased' BRG1 occupancy (changes from enriched to depleted BRG1 signal upon  
301 *IpmkKD* as seen in Figure 4C and G-I), we excluded the H3K4me3-Low promoters, which exhibited the  
302 extremely low BRG1 signals (Figure 5A, top right). Furthermore, regarding the fact that TSS divided the  
303 BRG1 intensity into two (Figure 5A, top left), we defined two genomic regions (Upstream and Downstream)  
304 that coincided with the two major BRG1 intensity (which also coincided with -1 and +1 nucleosomes),  
305 respectively (Figure 5A, top). We then categorized the 9,042 TSS with *IpmkKD*-induced decreased BRG1  
306 occupancy into five clusters based on the combinatorial changes in BRG1 levels upon *IpmkKD* at the  
307 previously defined two genomic regions (Figure 5C, left and middle) and subdivided these five clusters  
308 based on two promoter types (Figure 5C, right). Regarding the number of promoter-TSS with decreased  
309 BRG1 level upon *IpmkKD*, H3K4me3-Only promoters (Figure 5B and C, right) and Cluster2/3 (Figure 5C)  
310 occupied a large proportion. In accordance with our defined classification (Figure 5C, left), we detected  
311 that BRG1 occupancy was reduced upon *IpmkKD* at both promoters and five distinctive clusters (Figure  
312 5D).

313 Previously, it is reported that BRG1, localized at -1 nucleosome in wide NFR (median length 808 bp)  
314 of H3K4me3-Only and bivalent promoters, positively regulates the chromatin accessibility of NFR,  
315 whereas BRG1 that localized at +1 nucleosome in narrow NFR (median length 28 bp) of H3K4me3-Only  
316 promoters tends to inhibit the chromatin accessibility of NFR in mESCs (de Dieuleveult et al., 2016). To  
317 elucidate the effect of *IpmkKD*-induced decreased BRG1 occupancy on chromatin accessibility at two  
318 promoters and five clusters, we analyzed two ATAC-seq data of ours (*IpmkKD*) and publically released  
319 (*Brg1KD*, GSE64825). We calculated the differential ATAC-seq signals (KD vs. controls) at Center regions,  
320 where ATAC-seq intensity is highly enriched (Figure 5A). Consistent with our previous genome-wide  
321 results (Figure 4G-I), we found that ATAC-seq signals (chromatin accessibility) were significantly reduced  
322 upon *IpmkKD* at two promoters (Figure 5E) and most clusters (Figure 5F), where these promoters/clusters  
323 were defined by decreased BRG1 occupancy upon *IpmkKD*. Notably, we observed that ATAC-seq signals  
324 (chromatin accessibility) were decreased similarly upon *IpmkKD* and *Brg1KD* at two promoters (Figure  
325 5E) and five clusters (Figure 5F). Since the reduced BRG1 occupancy upon *IpmkKD* partially mimics the  
326 *Brg1KD*, the similar result upon *IpmkKD* and *Brg1KD* further supports that IPMK plays a vital role in  
327 chromatin accessibility at promoter-TSS by regulating the BRG1 occupancy. Intriguingly, we found that

328 the ATAC-seq signals at bivalent promoters were more reduced upon *Ipmk*KD compared to those at  
329 H3K4me3-Only promoters (Figure 5E and F). Furthermore, we detected that the ATAC-seq signals at  
330 Cluster2 of bivalent promoters were more reduced upon *Ipmk*KD than other clusters (Figure 5 F), consistent  
331 with the fact that in bivalent promoters, BRG1 is localized at the -1 nucleosome and maintains the chromatin  
332 accessibility (de Dieuleveult et al., 2016). Although H3K4me3-Only promoters also contain Cluster2, we  
333 did not detect the robust decrease in ATAC-seq signals at Cluster2 of H3K4me3-Only promoters, unlike  
334 the bivalent promoter case (Figure 5F). This discrepancy may be due to the different BRG1 occupancy in  
335 Upstream (-1 nucleosome) and Downstream (+1 nucleosome) regions of Cluster2 in *Egfp*KD mESCs;  
336 BRG1 is highly enriched at Upstream compare to Downstream regions in bivalent promoters, while in  
337 H3K4me3-Only promoters, BRG1 levels are relatively similar at both Up/Downstream regions (Figure 5D).  
338 Interestingly, although we applied the same criteria when categorizing the five clusters, H3K4me3-Only  
339 and bivalent promoters exhibited different BRG1 localizations in *Egfp*KD mESCs at Cluster2 and Cluster3,  
340 indicating that these two promoters each possess distinct BRG1 localizations in mESCs. Together, these  
341 results suggest that IPMK plays a pivotal role in maintaining the chromatin accessibility of bivalent  
342 promoters, particularly by safeguarding the BRG1 occupancy at the -1 nucleosome.

343 By comparing with the BRG1 unchanged locus (Figure 5G, left), we confirmed the close association  
344 between reduced BRG1 level upon *Ipmk*KD and decreased ATAC-seq signals upon *Ipmk*KD and *Brg1*KD  
345 at specific loci of H3K4me3-Only and bivalent promoters (Figure 5G and H). However, at a specific locus,  
346 we noticed that some BRG1 peaks do not coincide with Up/Downstream regions (Figure 5H), indicating  
347 that our promoter-TSS classification using Up/Downstream regions with fixed length does not include  
348 promoter-TSS with far away BRG1 peaks. To overcome this, we first selected BRG1 CUT&RUN peaks  
349 (*Egfp*KD) that reside in close proximity to TSS ( $\pm 1$  kb) and then newly classified the promoter-TSS into  
350 six clusters depending on the position of BRG1 peaks relative to the position of TSS (Figure 5—figure  
351 supplement 1A and B). Among six clusters, Cluster1 and 5, which contain BRG1 peaks at TSS and upstream  
352 of TSS, respectively, occupied a large proportion (Figure 5—figure supplement 1B). Interestingly, we  
353 observed that BRG1 localizations were remarkably similar at Cluster1/2/3, and independently at Cluster4/5  
354 (Figure 5—figure supplement 1A). To simplify the clustering, we merged Cluster1/2/3 as ClusterC and  
355 Cluster4/5 as ClusterL (Cluster6 is equivalent to ClusterR) (Figure 5—figure supplement 1C and D).  
356 Consistently, ClusterC and L, which contain BRG1 peaks at their TSS and upstream of their TSS,  
357 respectively, were predominant (Figure 5—figure supplement 1D). We then divided each cluster depending  
358 on their decreased or increased BRG1 level by calculating the differential BRG1 level (*Ipmk*KD vs. *Egfp*KD)  
359 at the BRG1 peaks corresponding to TSS (Figure 5—figure supplement 1E), instead of at the defined  
360 Up/Downstream regions (Figure 5B and C). Consistent with the genome-wide decrease in BRG1  
361 occupancy at the promoter-TSS (Figure 4I), we found that 60-70% of clusters exhibited decreased BRG1  
362 level upon *Ipmk*KD (Figure 5—figure supplement 1E). Furthermore, most of these *Ipmk*KD-induced  
363 decreased BRG1 clusters were identified as H3K4me3-Only promoters (Figure 5—figure supplement 1F).

364 To elucidate the effect of *Ipmk*KD-induced decreased BRG1 occupancy on chromatin accessibility, we

365 first confirmed a significant reduction in BRG1 occupancy upon *Ipmk*KD at the pre-defined BRG1-  
366 decreased clusters/promoters (Figure 5—figure supplement 1G). Next, we calculated differential ATAC-  
367 seq signals (*Ipmk*KD vs. *Egfp*KD and *Brg1*KD vs. control) at ATAC-seq peaks (*Egfp*KD) that reside near  
368 the TSS ( $\pm 0.5$  kb) of each BRG1-decreased cluster/promoter. Consistent with our previous results (Figure  
369 5E and F), we observed that both *Ipmk*KD and *Brg1*KD induced similarly decreased ATAC-seq levels at  
370 both promoters and all three clusters (Figure 5—figure supplement 1H). When comparing H3K4me3-Only  
371 and bivalent promoters, we observed that ClusterC exhibited a similar reduction, while ClusterL/R  
372 exhibited more reduction at bivalent promoters upon *Ipmk*KD (Figure 5—figure supplement 1H, blue).  
373 Similarly, we observed that all three clusters exhibited more reduction at bivalent promoters compared to  
374 H3K4me3-Only promoters upon *Brg1*KD (Figure 5—figure supplement 1H, green). Lastly, among bivalent  
375 promoters, we detected that ClusterL (very similar to Cluster2 in Figure 5) exhibited the most significant  
376 reduction in ATAC-seq signals upon *Ipmk*KD (Figure 5—figure supplement 1H).

377 Collectively, our two alternative analyses suggest that IPMK depletion cause the most severe impacts  
378 on the chromatin accessibility at bivalent promoters, which are strongly associated with the *Ipmk*KD-  
379 induced decreased BRG1 occupancy at -1 nucleosomes. Taken together, these findings indicate that IPMK  
380 regulates BRG1 occupancy and BRG1-mediated chromatin accessibility at promoter-TSS regions.

381

### 382 **Loss of IPMK partially affects transcription via disrupted BRG1 localization and chromatin** 383 **accessibility at promoter-TSS**

384 To investigate the effect of *Ipmk*KD-driven disrupted BRG1 occupancy and chromatin accessibility on  
385 the transcription, we performed high-throughput mRNA sequencing (mRNA-seq) using mESCs with  
386 RNAi-mediated knockdown of *Ipmk* (*Ipmk*KD). We next calculated the differential mRNA expression  
387 levels (*Ipmk*KD vs. *Egfp*KD) of genes having the promoters with decreased BRG1/ATAC-seq intensity  
388 upon *Ipmk*KD (Figure 5D and E, Total). The mRNA expression of genes with both promoter types was  
389 down-regulated upon *Ipmk*KD (Figure 5—figure supplement 1I). Intriguingly, we detected that mRNA  
390 expression of genes with bivalent promoters was significantly down-regulated upon *Ipmk*KD, compared to  
391 H3K4me3-Only promoters (Figure 5—figure supplement 1I). This discrepancy may arise from our  
392 previous results that *Ipmk*KD impacted the bivalent promoter-TSS's chromatin accessibility more than  
393 those of H3K4me3-Only promoters (Figure 5E, F, and Figure 5—figure supplement 1H). To check the  
394 decreased BRG1/ATAC-seq-associated down-regulation of gene expressions upon *Ipmk*KD, we performed  
395 a real-time quantitative polymerase chain reaction (RT-qPCR), a conventional method to check the gene  
396 expression. We first determined the successful knockdown of *Ipmk* (Figure 6A). Next, we confirmed that  
397 mRNA expression of genes, exhibiting decreased BRG1 occupancy upon *Ipmk*KD and reduced ATAC-seq  
398 signals upon *Ipmk*KD/*Brg1*KD at H3K4me3-Only (*Nmral1*) or bivalent (*Phactr3*) promoters, were  
399 significantly down-regulated upon *Ipmk*KD (Figure 6B). To examine this in a genome-wide manner, we  
400 identified differentially expressed genes (DEGs) by comparing the gene expression of *Ipmk*KD with that  
401 of control (*Egfp*KD) cells and identified 300 down-regulated DEGs (Figure 6C). Notably, we observed that  
402 BRG1 occupancy and BRG1-mediated chromatin accessibility (ATAC-seq signals) were both significantly

403 reduced near TSS of down-regulated DEGs upon *Ipmk*KD compared to *Egfp*KD (Figure 6D). We further  
404 confirmed this by monitoring the specific down-regulated DEG loci, including *Phactr3*, *Lrrc61*, and  
405 *Arhgap44* (Figure 6B, right, E, and F). Together, these results suggest that IPMK maintains the expression  
406 of a subset of genes by safeguarding the appropriate BRG1 occupancy and BRG1-mediated chromatin  
407 accessibility at promoter-TSS in mESCs.

408

#### 409 **IPMK and SMARCB1 regulate a common set of genes in mESCs and MEFs**

410 To investigate the functional interactions between IPMK and SMARCB1 in a transcription aspect, we  
411 performed mRNA-seq using mESCs upon *Ipmk*KD or *Smarcb1*KD. Using the same criteria (fold change  $\geq$   
412 1.5 and  $P$ -value  $\leq 0.05$ ), we defined differentially expressed genes (DEGs) by comparing the gene  
413 expression of *Ipmk*KD or *Smarcb1*KD cells with that of control (*Egfp*KD) cells. A total of 217 up-regulated  
414 DEGs and 300 down-regulated DEGs were identified in *Ipmk*KD cells (Figure 6C), and 248 up-regulated  
415 DEGs and 291 down-regulated DEGs were identified in *Smarcb1*KD cells (Figure 6G). Given that our  
416 previous results demonstrated the physical binding between IPMK and SMARCB1, we hypothesized that  
417 IPMK and SMARCB1 would functionally interact with each other. To check this hypothesis, we classified  
418 DEGs of *Ipmk*KD cells into six clusters based on the combinatorial mRNA expression changes upon  
419 *Ipmk*KD and *Smarcb1*KD (Figure 6H and Supplementary Table 3). Among these six clusters, Cluster1/2/3  
420 represent the up-regulated DEGs upon *Ipmk*KD, whereas Cluster4/5/6 represent the down-regulated DEGs  
421 upon *Ipmk*KD. Specifically, Cluster1 and Cluster5 each represent the up-regulated DEGs and down-  
422 regulated DEGs shared by both *Ipmk*KD and *Smarcb1*KD cells, respectively. In contrast, Cluster2 and  
423 Cluster4 each represent the oppositely regulated DEGs upon *Ipmk*KD and *Smarcb1*KD; Cluster2 contains  
424 up-regulated DEG upon *Ipmk*KD and down-regulated DEG upon *Smarcb1*KD, while Cluster4 contains  
425 down-regulated DEGs upon *Ipmk*KD and up-regulated DEG upon *Smarcb1*KD. The remaining DEGs of  
426 *Ipmk*KD cells were marked as Cluster3/6. Surprisingly, DEGs that were regulated in the same manner (both  
427 up-regulated Cluster1 and both down-regulated Cluster5, 18.8%) were far more abundant than DEGs that  
428 were oppositely regulated (Cluster2 and Cluster4, 0.6%) (Figure 6H and I). If we assume that IPMK is not  
429 functionally related to SMARCB1, the number of DEGs regulated in the same fashion or the opposite  
430 fashion should be similar. However, we observed that DEGs regulated in the same manner are much more  
431 abundant (~32 fold more) than DEGs that are oppositely regulated upon *Ipmk*/*Smarcb1*KD, indicating that  
432 IPMK and SMARCB1 regulate the common gene sets in mESCs. In addition, we observed that both up-  
433 regulated and down-regulated DEGs of *Ipmk*KD cells significantly overlapped with those of *Smarcb1*KD  
434 cells (Figure 6J), further supporting the functional linkage between IPMK and SMARCB1. Finally, we  
435 performed gene ontology (GO) analysis using genes representing Cluster1 and Cluster5. Despite the similar  
436 number of genes in Cluster1 ( $n=50$ ) and Cluster5 ( $n=47$ ), the GO terms of Cluster5 were significantly  
437 enriched compared to those of Cluster1 (Figure 6—figure supplement 1A), suggesting that down-regulated  
438 DEGs regulated by IPMK/SMARCB1 are more closely associated/related to each other compared to up-  
439 regulated DEGs. These results indicate that IPMK and SMARCB1 regulate the expression of common gene

440 sets in the same manner, and among these genes, down-regulated DEGs are closely associated with each  
441 other.

442 To further investigate whether the functional interaction between IPMK and SMARCB1 is a specific  
443 feature of mESCs or a more general feature, we performed identical analyses in MEFs (NIH3T3). We first  
444 defined DEGs; a total of 209 up-regulated DEGs and 275 down-regulated DEGs were identified upon  
445 *Ipmk*KD, and 404 up-regulated DEGs and 678 down-regulated DEGs were identified upon *Smarcb1*KD  
446 (Figure 6—figure supplement 1B). We then defined the six clusters with the same procedure described for  
447 the mESCs. Consistent with the results obtained in the mESCs (Figure 6H and I), DEGs regulated in the  
448 same manner (both up-regulated Cluster1 and both down-regulated Cluster5, 23.8%) were much more  
449 abundant than DEGs that are oppositely regulated (Cluster 2/4, 1.7%) (Figure 6—figure supplement 1C, D,  
450 and Supplementary Table 4). Furthermore, we confirmed that both up-regulated and down-regulated DEGs  
451 of *Ipmk*KD cells significantly overlapped with those of *Smarcb1*KD cells (Figure 6—figure supplement  
452 1E), consistent with the results obtained from mESCs (Figure 6J). Taken together, the fact that IPMK and  
453 SMARCB1 regulate a common set of genes in the same fashion strongly implies the transcription-related  
454 functional interaction between IPMK and SMARCB1 both in mESCs and MEFs.  
455

## 456 DISCUSSION

457 Using two unbiased screening (yeast two-hybrid and APEX2 proximity labeling), we detected  
458 SMARCB1 and other core subunits of the mammalian SWI/SNF complex (BRG1, BAF155, BAF170,  
459 ARID1A, and PBRM1) as IPMK-proximal/binding targets. Notably, our binary protein interaction assays  
460 showed that IPMK directly binds to SMARCB1, BRG1, and BAF155, individually. Furthermore, *in vivo*  
461 and *in vitro* immunoprecipitation assays confirmed that IPMK physically associates with the native  
462 SWI/SNF complexes. Detailed mapping studies further revealed reciprocal interactions between the Rpt  
463 domains of SMARCB1 and the IP kinase domain of IPMK. In accordance with our previous finding  
464 (physical association of IPMK-SWI/SNF complex), our CUT&RUN analysis showed that IPMK is co-  
465 localized with BRG1 globally, especially at the promoter-TSS. Surprisingly, by performing CUT&RUN  
466 and ATAC-seq, we discovered that the depletion of IPMK severely perturbed (decreased) the genome-wide  
467 BRG1 localizations and corresponding BRG1-mediated chromatin accessibility (ATAC-seq signals). By  
468 categorizing promoter-TSS, we found that IPMK depletion significantly affected the chromatin  
469 accessibility at the bivalent promoters, which were associated with the disrupted BRG1 occupancy at the -  
470 1 nucleosome. Using RT-qPCR and mRNA-seq, we detected that the IPMK loss also affects the  
471 transcription of genes exhibiting disrupted BRG1/ATAC-seq levels at their promoter-TSS. Lastly, our  
472 mRNA-seq analyses also demonstrated that IPMK and SMARCB1 regulate common gene sets, implying a  
473 functional link between IPMK and SWI/SNF complex. Taken together, these results elucidate the critical  
474 role of IPMK in regulating BRG1 localizations and BRG1-mediated chromatin accessibility through the  
475 physical association between IPMK and SWI/SNF complex (Figure 7).

476 The physical association between IPMK and SWI/SNF complex is very engaging regarding the  
477 structural aspect. According to the recently published cryo-EM-based structure of nucleosome-bound  
478 human SWI/SNF complexes (He et al., 2020), the nucleosome is sandwiched by the ATPase module of  
479 BRG1 and the base module of SMARCB1 (C-terminal  $\alpha$  helix of the Rpt2 domain). BRG1 grasps the upper  
480 side of a nucleosome, whereas SMARCB1 binds to the bottom surface of a nucleosome through their  
481 positively charged four arginine residues at the C-terminal  $\alpha$  helix of Rpt2 domain interacting with the  
482 acidic patch of histone octamers (He et al., 2020) (Figure 7—figure supplement 1). Considering this, we  
483 revisited our domain mapping results, showing that Rpt1 (all regions including N-terminal  $\beta$  sheets and C-  
484 terminal  $\alpha$  helices) and Rpt2 (N-terminal  $\beta$  sheets) domains of SMARCB1 and reciprocally, the Exon3/4/6  
485 of IPMK (consists of ~71% of IPMK proteins) are required for IPMK-SMARCB1 binding (Figure 7A, left).  
486 The N-terminal  $\beta$  sheets of the Rpt2 domain seem to be quite buried at the frontal view of nucleosome-  
487 bound SWI/SNF complex (He et al., 2020). However, if we rotate the structure and see the back view, we  
488 could observe that the beginning part (that is close to C-terminal  $\alpha$  helices of Rpt1) of N-terminal  $\beta$  sheets  
489 of Rpt2 is being exposed, which may allow some space for IPMK binding. More importantly, we also  
490 noticed some space near the Rpt1 domain of SMARCB1 and nucleosomal DNA exit sites, which may  
491 provide space for IPMK binding. Intriguingly, this space is positioned near BRG1 and BAF155, which can  
492 directly bind to IPMK independent of SMARCB1, according to our results. In accordance with this, our

493 APEX2 data also support this idea by showing that SMARCB1 (BAF47), BRG1 (SMARCA4), SMARCC2  
494 (BAF170), ARID1A (BAF250A), PBRM1 (BAF180), BAF155 (SMARCC1), and core histones (histone  
495 H2B, H3.1, and H4) as IPMK-proximal/binding target proteins (Figure 1B, C, and Figure 1—figure  
496 supplement 1). Together, we believe that IPMK would be positioned at specific sites within SWI/SNF  
497 complex, where it meets the three conditions: (1) sites where IPMK directly binds to the Rpt1 domain (all  
498 regions containing N-terminal  $\beta$  sheets and C-terminal  $\alpha$  helices) of SMARCB1, (2) sites where IPMK  
499 directly binds to SMARCB1, BRG1, and BAF155, and (3) sites proximal to the various subunits of  
500 SWI/SNF complexes, including SMARCB1, BRG1, BAF155, BAF170, ARID1A (BAF250A), PBRM1  
501 (BAF180), and core histones. Regarding these conditions, we propose a model in which IPMK physically  
502 associates with SWI/SNF complex by directly binding to SMARCB1, BRG1, and BAF155 (Figure 7A,  
503 right). Our proposed model also suggests that IPMK may be positioned near the nucleosomal DNA exit site  
504 of SWI/SNF complex, which close to the Rpt1 domain of SMARCB1 (Figure 7—figure supplement 1).

505 It is previously suggested that the Rpt1 domain of SMARCB1 may facilitate the DNA detachment of  
506 the SWI/SNF complex, acting as a “wedge” at nucleosomal DNA exit sites (He et al., 2020). According to  
507 our results, IPMK is proximal to the core histones and it directly binds to the core subunits (BRG1 and  
508 Rpt1 domain of SMARCB1) that sandwich the nucleosomes, suggesting that IPMK may have a role in the  
509 interaction between SWI/SNF complex and chromatin. In support of this, our CUT&RUN and ATAC-seq  
510 results indicate that the IPMK depletion disrupts the global BRG1 occupancy and its downstream, BRG1-  
511 mediated, chromatin accessibility in a genome-wide manner, including promoter-TSS regions. Collectively,  
512 our findings suggest that IPMK plays an important role in regulating the localization of mammalian  
513 SWI/SNF complex by enhancing the SWI/SNF-nucleosome interactions via physical binding, thereby  
514 maintaining the appropriate chromatin accessibility (Figure 7B). Thus, when IPMK is depleted, it affects  
515 the SWI/SNF-Nucleosome interactions, resulting in perturbed BRG1 localizations and decreased chromatin  
516 accessibility (Figure 7B).

517 Despite our findings, the mechanism on how IPMK modulates the localization of BRG1 (or SWI/SNF  
518 complex) remains unclear. We believe that the physical association of the IPMK-SWI/SNF complex is  
519 strongly connected with the BRG1 localization, but the detailed mechanism is still elusive. IPMK may  
520 facilitate the recruitment of the SWI/SNF complex’s subunits from cytoplasm to chromatin. However, our  
521 observations from chromatin fractionation assays indicated that IPMK depletion did not affect the BRG1  
522 or SMARCB1 occupancy in the cytoplasm or chromatin fractions (Figure 4A), excluding the above  
523 possibility. Alternatively, it is plausible that IPMK may aid the appropriate conformation of specific subsets  
524 of SWI/SNF complex by physically binding near the nucleosomal DNA exit sites within the SWI/SNF  
525 complex. Thus, by aiding the appropriate conformation of the SWI/SNF complex, IPMK plays a vital role  
526 in SWI/SNF-nucleosome interactions, thereby facilitating/stabilizing the BRG1 occupancy on the  
527 chromatin. Although IPMK depletion reduced the global BRG1 occupancy, our CUT&RUN results  
528 indicated that IPMK depletion exhibits more impact at the CUT&RUN peaks with lowly enriched BRG1  
529 in *Egfp*KD (wild-type-like) mESCs, compared to highly enriched BRG1 peaks (Figure 4C and G-I).  
530 Importantly, our ATAC-seq results also corresponded to the region-specific (BRG1 low) changes in BRG1

531 occupancy upon *Ipmk*KD (Figure 4C and G-I). In support of this, IPMK depletion exhibited more impact  
532 on the chromatin accessibility and transcription of the relatively-low-BRG1-harboring bivalent promoters  
533 than H3K4me3-Only promoters, which harbor high BRG1 levels (Figure 5 and 6). Together, these results  
534 indicate that IPMK primarily regulates the BRG1 occupancy (which resembles the SWI/SNF-nucleosome  
535 interactions) and its downstream effects (chromatin accessibility and transcription) at the region where the  
536 BRG1 level is originally low in mESCs but does not affect the regions with high BRG1 level. This  
537 contextual discrepancy in IPMK-dependent or IPMK-independent BRG1 occupancy may provide key clues  
538 to the mechanism on how IPMK modulates the BRG1 localization, but further experiments/analyses are  
539 required.

540 Previous studies showing that IPMK regulates several target proteins (including cytosolic signaling  
541 factors and transcription factors) through protein-protein interaction also support our view. In earlier studies,  
542 IPMK was found to bind to mTOR and raptor, maintaining the mTOR-raptor association and amino acid-  
543 induced mTOR signaling (S. Kim et al., 2011). Glucose signaling activates the phosphorylation of IPMK,  
544 enabling IPMK-AMPK binding, thereby enhancing its signaling (Bang et al., 2012). Furthermore, IPMK  
545 stimulates p53-mediated transcription by binding to p53, thus facilitating p53-mediated cell death (Xu, Sen,  
546 et al., 2013). IPMK also binds with CBP/p300, a transcriptional coactivator of CREB, and augments the  
547 expression of CREB-regulated genes (Xu, Paul, et al., 2013). IPMK also binds to SRF, enhancing its  
548 interactions with the serum response element at the promoters, and induces immediate early gene  
549 expressions (E. Kim et al., 2013). Lastly, IPMK, which possesses PI3K activity, interacts with the SF-1  
550 nuclear receptor and generates SF-1-PIP<sub>3</sub> complex, promoting lipid-mediated signaling in the nucleus  
551 (Blind et al., 2014; Blind, Suzawa, & Ingraham, 2012). Conversely, core subunits of the SWI/SNF complex  
552 also interact with various factors, such as PDX1 and CTCF (Marino et al., 2019; Spaeth et al., 2019). In  
553 addition, direct interactions between SWI/SNF complex and oncogenes/tumor-suppressor genes, such as  
554 RB (Retinoblastoma), BRCA1, c-MYC, and MLL, have been implicated in oncogenesis (Roberts & Orkin,  
555 2004). Although these studies support our view that the direct physical association between IPMK and  
556 SWI/SNF complex may affect diverse epigenetic events (such as BRG1 localization, chromatin  
557 accessibility, or transcription), further experiments are required to elucidate the precise underlying  
558 mechanisms of this phenomenon.

559 SWI/SNF chromatin remodeling complex is frequently mutated in cancer (Helming, Wang, & Roberts,  
560 2014). Particularly, SMARCB1 is a *bona fide* tumor suppressor gene (Roberts, Galusha, McMenamin,  
561 Fletcher, & Orkin, 2000; Roberts, Leroux, Fleming, & Orkin, 2002), which is inactivated or lost in multiple  
562 malignancies, such as malignant rhabdoid tumors. A germline mutation of *IPMK* was recently found in  
563 familial small intestinal carcinoid patients (Sei et al., 2015). A truncated *IPMK* allele was associated with  
564 reduced P53 signaling in these patients, suggesting a tumor suppressor role of IPMK. Additionally, the  
565 *IPMK* mRNA levels were down-regulated by the tumor suppressor miR-18a, which contributes to the  
566 inhibition of ovarian tumor growth (Liu et al., 2017). Finally, the exogenous supply of IP<sub>4</sub>, which is  
567 produced by IPMK, can suppress human cancer cell growth by inhibiting the activation of AKT/PKB  
568 (Jackson, Al-Saigh, Schultz, & Junop, 2011; Piccolo et al., 2004; Razzini et al., 2000). Considering these



569 previous reports with our results (that elucidated the physical/function linkage between the tumor  
570 suppressor SMARCB1 and IPMK), it would be interesting to conduct genome-wide studies characterizing  
571 the role of combined action of IPMK-SMARCB1 in the context of cancer.

572 Our study is the first to elucidate the physical association between IPMK and core subunits of SWI/SNF  
573 complex, and the first to define the molecular function of IPMK in coordinating the BRG1 localizations  
574 and BRG1-associated chromatin accessibility in mESCs. Considering our results and recently published  
575 cryo-EM-based structure of human SWI/SNF (BAF) complex, we propose a model in which IPMK  
576 physically associates with SWI/SNF complex via directly binding to SMARCB1, BRG1, and BAF155 and  
577 positions near the nucleosomal DNA exit site of SWI/SNF complex, which is in close proximity to the Rpt1  
578 domain of SMARCB1 (the IPMK-binding domain). Based on this model, IPMK plays an important role in  
579 regulating the SWI/SNF-nucleosome interactions, thereby maintaining an appropriate BRG1 occupancy  
580 and BRG1-mediated chromatin accessibility. We believe these novel findings will play a pivotal role in  
581 future studies of IPMK and understanding the molecular mechanisms of mammalian SWI/SNF complexes,  
582 especially by providing additional clues in SWI/SNF-mediated generation of nucleosome free regions at  
583 the transcription start sites (TSS).  
584

## 585 MATERIALS AND METHODS

### 586 Yeast two-hybrid screening.

587 Panbionet (Pohang, South Korea) conducted yeast two-hybrid screening (<http://panbionet.com>). The full  
588 IPMK coding region of 416 amino acids was amplified by polymerase chain reaction (PCR). The PCR  
589 product was cloned into the pGBKT7 vector, which contains the DNA-binding domain (BD) of GAL4.  
590 *Saccharomyces cerevisiae* strain AH109 (Clontech) was co-transformed with GAL4 DNA-BD-fused IPMK  
591 and a human brain cDNA activation domain (AD) library (Clontech). Two different reporter genes (*HIS3*  
592 and *ADE2*) were used as selection markers. Yeast transformants were spread on a selection medium lacking  
593 leucine, tryptophan, and adenine or histidine (SD-LWA and SD-LWH). To confirm the interactions, the  
594 candidate prey genes of candidates were amplified via PCR or *E. coli* transformation, and reintroduced into  
595 the AH109 yeast strain with the IPMK bait plasmid.

596

### 597 Generation of stable cell lines for APEX2-mediated proximity labeling

598 V5-APEX2 was PCR-amplified from the pcDNA5-Mito-V5-APEX2 plasmid, which was kindly provided  
599 by Dr. Hyun-Woo Rhee (Seoul National University). V5-APEX2 alone or IPMK-V5-APEX2 were cloned  
600 into the pcDNA<sup>TM</sup>5/FRT/TO plasmid (Invitrogen). Flp-In<sup>TM</sup> T-REx<sup>TM</sup>-293 (Invitrogen) cells were seeded  
601 in 6-well culture plate to reach 70% confluency, then co-transfected with 0.25 µg of pcDNA<sup>TM</sup>5/FRT/TO  
602 and 2.25 µg of pOG44 Flp recombinase expression plasmid (Invitrogen) using Lipofectamine LTX with  
603 Plus Reagent (Invitrogen). After 48 hours, the cells were transferred to 90 mm culture dishes to undergo  
604 negative selection with 50 µg/ml Hygromycin B (Gibco) until all non-transfected cells were dead.  
605 Surviving cells were then seeded with low confluency to generate cellular clones on culture plates, after  
606 which each clone was individually screened for APEX2 construct expression with or without doxycycline  
607 (Sigma Aldrich) in order to search for optimal cell populations with minimal uncontrolled APEX2  
608 expression and maximal APEX2 expression under stimulation. Selected clones were then expanded and  
609 stored in liquid nitrogen for downstream experiments.

610

### 611 APEX2-mediated proximity labeling

612  $1.4 \times 10^7$  APEX2-expressing cells were seeded in T75 culture flasks. 16 hours after seeding, the culture  
613 medium was exchanged with complete medium supplemented with doxycycline (100 ng/ml) for APEX2  
614 expression. After 24 hours of induction, the cells were incubated in fresh media containing 250 µM  
615 desthiobiotin-phenol (DBP) for 30 minutes in a CO<sub>2</sub> incubator at 37°C. The cells were then moved to room  
616 temperature, and hydrogen peroxide (diluted in DPBS to 1mM; Sigma Aldrich) was added to initiate the  
617 APEX2-driven biotinylation reaction. The reaction was quenched by adding a 2X quenching solution (20  
618 M sodium ascorbate, 10 mM Trolox, and 20 mM sodium azide in DPBS) to the medium. The cells were  
619 further washed with 1X quencher solution for three times, collected by centrifugation, snap-frozen and  
620 stored at -80°C until lysis. DBP was synthesized as described in a previous report (S. Y. Lee et al., 2017).

621

## 622 **Preparation of DBP-labeled peptides for LC-MS/MS**

623 DBP-labeled peptides were prepared from frozen cell pellets as described in a previous report (Kwak et al.,  
624 2020). Briefly, cells were lysed in lysis buffer (2% SDS, 1X protease inhibitor cocktail (Roche), and 1 mM  
625 sodium azide in 1X TBS) and excess DBP was eliminated through repeated acetone precipitation. The  
626 resulting protein precipitates were again solubilized in 50 mM ammonium bicarbonate and quantified. 4  
627 mg of cellular protein was then denatured, reduced, alkylated, and digested into peptides with trypsin.  
628 Afterward, tryptic DBP-labeled peptides were bound to streptavidin beads (Pierce) and collected with  
629 elution buffer (80% acetonitrile, 0.2% trifluoroacetic acid, 0.1% formic acid in MS-grade water). Solvents  
630 were completely evaporated on a SpeedVac for 3 hours, and the resulting peptides were stored at -20°C  
631 until required for LC-MS/MS analysis.

632

## 633 **LC-MS/MS**

634 The resulting tryptic peptides were analyzed by LC-MS/MS. All mass analyses were performed on a Q  
635 Exactive Plus orbitrap mass spectrometer (Thermo Fisher Scientific) equipped with a nanoelectrospray ion  
636 source. To separate the peptide mixture, we used a C18 reverse-phase HPLC column (500 mm × 75 µm ID)  
637 using an acetonitrile/0.1% formic acid gradient from 3.2 to 26% for 120 minutes at a flow rate of 300  
638 nL/min. For MS/MS analysis, the precursor ion scan MS spectra (m/z 400~2000) were acquired in the  
639 Orbitrap at a resolution of 70,000 at m/z 400 with an internal lock mass. The 15 most intensive ions were  
640 isolated and fragmented by High-energy collision induced dissociation (HCD).

641

## 642 **LC-MS/MS data processing**

643 All MS/MS samples were analyzed using Sequest Sorcerer platform (Sagen-N Research, San Jose, CA).  
644 Sequest was set up to search the *Homo sapiens* protein sequence database (20675 entries, UniProt  
645 (<http://www.uniprot.org/>)), which includes frequently observed contaminants, assuming the digestion  
646 enzyme trypsin. Sequest was searched with a fragment ion mass tolerance of 1.00 Da and a parent ion  
647 tolerance of 10.0 ppm. Carbamidomethylation of cysteine was specified in Sequest as a fixed modification.  
648 Oxidation of methionine and acetyl of the n-terminus, biotin of lysine and DBP of tyrosine were specified  
649 in Sequest as variable modifications. Scaffold (Version 4.11.0, Proteome Software Inc., Portland, OR) was  
650 used to validate MS/MS-based peptide and protein identifications. Peptide identifications were accepted if  
651 they could be established at greater than 93.0% probability to achieve a false discovery rate (FDR) less than  
652 1.0% by the Scaffold Local FDR algorithm. Protein identifications were accepted if they could be  
653 established at greater than 92.0% probability to achieve an FDR less than 1.0% and contained at least two  
654 identified peptides. Protein probabilities were assigned by the Protein Prophet algorithm (Nesvizhskii,  
655 Keller, Kolker, & Aebersold, 2003). Proteins that contained similar peptides and could not be differentiated  
656 based on MS/MS analysis alone were grouped to satisfy the principles of parsimony. Proteins were  
657 annotated with GO terms from NCBI (downloaded November 23, 2019) (Ashburner et al., 2000).

658

## 659 **Plasmids**

660 The cDNAs for human IPMK (NCBI Gene ID 253430) and human SMARCB1 (NCBI Gene ID 6598) were  
661 obtained respectively from Open Biosystems and Bioneer (Daejeon, South Korea). IPMK and SMARCB1  
662 cDNA constructs were amplified by PCR and the products were cloned into pCMV-GST and pcDNA3.1-  
663 FLAG vectors. Every construct was confirmed by DNA sequencing.

664

#### 665 ***In vitro* binding assay**

666 Recombinant human IPMK was purified as described previously (B. Lee et al., 2020). Briefly, human IPMK  
667 was expressed in Sf9 insect cells with a baculovirus system, harvested with lysis buffer consisting of 300  
668 mM NaCl, 50 mM Tris, pH 8.0, 5% glycerol and 1 mM phenylmethylsulfonylfluoride (PMSF). Freezing  
669 and thawing lysis method with liquid nitrogen was applied to the cells, and the supernatants were taken  
670 after centrifugation at 18,000 rpm for 90 minutes. Ni-NTA agarose (Qiagen) was applied with 20 mM  
671 imidazole incubated for 2 hours. The protein was eluted with 100 mM imidazole and the N-terminal HIS-  
672 tag was removed with TEV protease, followed by further purification with HiTrap and Superdex columns  
673 (GE Healthcare). Human SMARCB1 was translated *in vitro* using TNT Quick Coupled  
674 Transcription/Translation System (L1170, Promega). 1 µg of pcDNA3.1-FLAG-SMARCB1 was incubated  
675 at 30°C for 90 minutes with 20 µM methionine and TNT T7 Quick Master Mix. Translated FLAG-  
676 SMARCB1 was incubated with anti-FLAG M2 affinity gel (A2220, Sigma Aldrich), and then IPMK protein  
677 was added and incubated with rotation at 4°C.

678

#### 679 **Recombinant IPMK protein purification**

680 For GST-tagged protein, human IPMK cDNA was subcloned into pGEX4T plasmid (Sigma Aldrich),  
681 expressed in Escherichia coli, and purified on Glutathione Sepharose 4B beads (GE Healthcare) as  
682 described (J. Kim & Roeder, 2011). For FLAG-tagged proteins, wild-type or mutant IPMK cDNAs were  
683 subcloned into pFASTBAC1 plasmid (Thermo Fisher Scientific) with an N-terminal FLAG epitope, and  
684 baculoviruses were generated according to the manufacturer's instructions. Proteins were expressed in Sf9  
685 insect cells and purified on M2 agarose (Sigma Aldrich) as described (J. Kim & Roeder, 2011).

686

#### 687 **BAF complex purification**

688 The FLAG-DPF2 cell line was selected from HEK293T cells transfected with a FLAG-DPF2-pCAG-IP  
689 plasmid. Derived nuclear extracts (Dignam, Lebovitz, & Roeder, 1983) were incubated with M2 agarose in  
690 binding buffer (20 mM Tris HCl [pH 7.3], 300 mM KCl, 0.2 mM EDTA, 25% glycerol, 1.5 mM MgCl<sub>2</sub>, 10  
691 mM 2-mercaptoethanol, and 0.2 mM PMSF) at 4°C for 4 h. After extensive washing with wash buffer (20  
692 mM Tris HCl [pH 7.9], 150 mM NaCl, 0.2 mM EDTA, 5% glycerol, 2 mM MgCl<sub>2</sub>, 10 mM 2-  
693 mercaptoethanol, 0.2 mM PMSF, and 0.1% NP-40), complexes were eluted with wash buffer containing  
694 0.25 mg/ml FLAG peptide. Eluted complexes were fractionated by 10%–30% glycerol gradient and the  
695 fractions containing intact BAF complex were combined and concentrated using Amicon Ultra-4  
696 centrifugal filter (Millipore).

697

698 **Protein interaction assays**

699 For GST pull-down assays, 2 $\mu$ g of GST or GST-tagged IPMK immobilized on Glutathione Sepharose 4B  
700 beads were incubated with 200 ng of purified BAF complexes in binding buffer (20 mM Tris-HCl [pH 7.9],  
701 150 mM KCl, 0.2 mM EDTA, 20% glycerol, 0.05% NP-40, and 0.2 mg/ml BSA) at 4°C for 3 h. Beads  
702 were extensively washed with binding buffer without BSA, and bound proteins were analyzed by  
703 immunoblotting. For binary protein interaction assays following baculovirus-mediated expression, Sf9 cells  
704 were infected with baculoviruses expressing FLAG-IPMK and untagged BAF complex subunit. After 2  
705 days, total cell extracts were prepared by sonication in lysis buffer (20 mM Tris-HCl [pH7.9], 300 mM  
706 NaCl, 0.2 mM EDTA, 15% glycerol, 2 mM MgCl<sub>2</sub>, 1 mM DTT, 1 mM PMSF, and protease inhibitor  
707 cocktail [Roche]). Following clarification by centrifugation, cell extracts were incubated with M2 agarose  
708 at 4°C for 3 h and, after extensive washing with wash buffer (20 mM Tris-HCl [pH 7.9], 150 mM NaCl,  
709 0.2 mM EDTA, 15% glycerol, 2 mM MgCl<sub>2</sub>, 1 mM DTT, 1 mM PMSF, and 0.1% NP-40), bound proteins  
710 were analyzed by immunoblotting.

711

712 **Immunoblotting, immunoprecipitation, and GST pull-down**

713 For immunoblot analyses, the cells were washed twice with PBS and lysed in lysis buffer consisting of 1%  
714 Triton X-100, 120 mM NaCl, 40 mM Tris-HCl, pH 7.4, 1.5 mM sodium orthovanadate, 50 mM sodium  
715 fluoride, 10 mM sodium pyrophosphate, 1 mM EDTA, and protease inhibitor cocktail (Roche). Cell lysates  
716 were incubated at 4°C for 10 minutes, and the supernatants were collected by centrifuging at 13,000 rpm  
717 for 10 min. Protein concentrations were determined by the Bradford protein assay (Bio-Rad) or  
718 bicinchoninic acid (BCA) assay (Thermo Fisher Scientific). 20  $\mu$ g of protein lysates were separated by size,  
719 transferred to nitrocellulose membranes, and blotted with primary antibodies and secondary antibodies. The  
720 horseradish peroxidase (HRP) signals were visualized with the Clarity ECL substrate (Bio-Rad) and  
721 SuperSignal™ West Femto Maximum Sensitivity Substrate (Thermo Fisher Scientific), and measured by  
722 using a ChemiDoc imaging system (Bio-Rad). For immunoprecipitation, 2 mg of total protein was  
723 incubated with 5  $\mu$ g of primary antibodies for 16 hours with rotation at 4°C. 10  $\mu$ L of TrueBlot beads  
724 (Rockland Immunochemicals) were added and incubated for an additional hour. The samples were washed  
725 three times with lysis buffer and prepared for immunoblotting. For GST pull-down assay, 10  $\mu$ L of  
726 glutathione agarose beads (Incospharm) were added to 2 mg of total cell lysates and incubated for 16 hours  
727 with rotation at 4°C. The samples were then washed three times with lysis buffer and prepared for  
728 immunoblotting.

729

730 **Cell culture and cell line production**

731 E14Tg2a mouse embryonic stem cells (mESCs) were maintained under feeder-free conditions. Briefly, the  
732 cells were cultured on gelatin-coated cell culture dishes in an mESCs culture medium consisting of  
733 Glasgow's minimum essential medium (GMEM) containing 10% knockout serum replacement, 1% non-  
734 essential amino acids, 1% sodium pyruvate, 0.1 mM  $\beta$ -mercaptoethanol (all from Gibco), 1% FBS, 0.5%  
735 antibiotic-antimycotic (both from Hyclone) and 1,000 units/ml LIF (ESG1106, Millipore). The mESCs

736 were maintained at 37°C with 5% CO<sub>2</sub> in humidified air. NIH3T3 cells, mouse embryonic fibroblasts  
737 (MEFs) and human embryonic kidney (HEK)-293T cells were grown in high-glucose DMEM  
738 supplemented with 10% FBS, 2 mM L-glutamine, and penicillin/streptomycin (100 mg/ml), and maintained  
739 in a humid atmosphere of 5% CO<sub>2</sub> at 37°C. To generate tamoxifen-inducible IPMK knockout mice, *Ipmk*<sup>fl/fl</sup>  
740 mice were mated with UBC-Cre-ERT2 mice (The Jackson Laboratory). The MEFs were immortalized by  
741 transfecting with an SV40 large T-antigen plasmid, and the IPMK depletion was achieved by adding 1 μM  
742 4-hydroxytamoxifen for 48 hours. FLAG epitope-tagged mESCs and MEFs were generated as described  
743 previously (Savic et al., 2015). Briefly, the 3xFlag-P2A-Puromycin epitope tagging donor construct  
744 (pFETCh-Donor), CRISPR guide RNAs (gRNAs), and Cas9 expressing plasmids were manufactured by  
745 ToolGen (Seoul, Korea). mESCs were transfected using FUGENE HD (E2311, Promega), selected using  
746 puromycin (A11138-03, Gibco), and expanded. MEFs were transfected with the donor construct containing  
747 the neomycin resistance gene with Turbofect (R0533, Thermo Fisher Scientific) and selected using G418  
748 (11811023, Gibco).

749

#### 750 **RNA interference**

751 Control siRNA (scRNA) and siRNAs against *Egfp* (sense: 5'-GUUCAGCGUGUCCGGCGAG-3';  
752 antisense: 5'-CUCGCCGGACACGCUGAAC-3') and *Ipmk* (5'-CAGAGAGGUCCUAGUUAUUUCA-  
753 3'; antisense: 5'-AGUGAAAUAACUAGGACCUCUCUGUU-3') were synthesized and annealed by  
754 Bioneer (Daejeon, Korea), and siRNA against *Smarb1* was purchased from Sigma Aldrich. mESCs and  
755 MEFs were transfected with 50 nM of the corresponding siRNA using DharmaFECT I (T-2001-03,  
756 Dharmacon) according to the manufacturer's instructions. Briefly, the cells were seeded onto 6-well plates.  
757 One day later, 50 nM of siRNAs and DharmaFECT reagent were diluted in Opti-MEM (Gibco), incubated  
758 separately at 25°C for 5 minutes, and then mixed together. The mixtures were incubated at 25°C for 20  
759 minutes and added to the cell cultures. The culture medium was replaced after 24 hours and the transfected  
760 cells were harvested at 48 hours after transfection.

761

#### 762 **Chromatin fractionation**

763 A chromatin acid extraction was performed as described previously (Zhong, Martinez-Pastor, Silberman,  
764 Sebastian, & Mostoslavsky, 2013). mESCs or MEFs were collected and washed with PBS, and resuspended  
765 with lysis buffer consisting of 10 mM HEPES, pH 7.4, 10 mM KCl, 0.05% NP-40, 1 mM sodium  
766 orthovanadate, and protease inhibitor cocktail (Roche). The cell lysates were incubated 20 minutes on ice  
767 and centrifuged at 13,000 rpm. The supernatant contained the cytoplasmic proteins, and the pellet with  
768 nuclei was washed once with lysis buffer and centrifuged at 13,000 rpm for 10 minutes. The nuclei were  
769 resuspended with low salt buffer consisting of 10 mM Tris-HCl, pH 7.4, 0.2 mM MgCl<sub>2</sub>, 1% Triton-X 100,  
770 1 mM sodium orthovanadate, and protease inhibitor cocktail, then incubated 15 minutes on ice. After 10  
771 minutes of centrifugation, the supernatant contained the nucleoplasmic proteins, and the pellet contained  
772 the chromatin. The chromatin was then resuspended with 0.2 N HCl for 20 minutes on ice, centrifuged at

773 13,000 rpm for 10 minutes, and neutralized with 1M Tris-HCl, pH 8.0. The protein concentrations were  
774 determined and subjected to immunoblotting.

775

## 776 **CUT&RUN**

777 CUT&RUN assays were performed as previously described (Meers, Bryson, Henikoff, & Henikoff, 2019;  
778 Skene & Henikoff, 2017), with minor modification. Briefly, 4 million mESCs were harvested and washed  
779 with 1.5 ml Wash buffer (20 mM HEPES, pH 7.5, 150 mM NaCl, 0.5 mM Spermidine) three times. Cells  
780 were bound to activated Concanavalin A-coated magnetic beads (at 25°C for 10 min on a nutator), then  
781 permeabilized with Antibody buffer (Wash buffer containing 0.05% Digitonin and 4 mM EDTA). The bead-  
782 cell slurry was incubated with 3 µl relevant antibody (see below) in a 150 µl volume at 25°C for 2 hours on  
783 a nutator. After two washes in 1 ml Dig-wash buffer (Wash buffer containing 0.05% Digitonin), beads were  
784 resuspended in 150 µl pAG/MNase and incubated at 4°C for 1 hour on a nutator. After two washes in 1 ml  
785 Dig-wash buffer, beads were gently vortexed with 100 µl Dig-wash buffer. Tubes were chilled to 0°C for  
786 5min and ice-cold 2.2 mM CaCl<sub>2</sub> was added while gently vortexing. Tubes were immediately placed on  
787 ice and incubated at 4°C for 1 hour on a nutator, followed by addition of 100 µl 2xSTOP buffer (340 mM  
788 NaCl, 20 mM EDTA, 4 mM EGTA, 0.05% Digitonin, 0.1 mg/ml RNase A, 50 µg/ml glycogen) and  
789 incubated at 37°C for 30min on a nutator. Beads were placed on a magnet stand and the liquid was removed  
790 to a fresh tube, followed by addition of 2 µl 10% SDS and 2.5 µl proteinase K (20mg/ml) and incubated at  
791 50°C for 1 hour. DNA was extracted using phenol chloroform as described at  
792 <https://www.protocols.io/view/cut-amp-run-targeted-in-situ-genome-wide-profiling-zcpcf2vn>. CUT&RUN  
793 libraries were prepared using a NEXTflex ChIP-seq Library kit (5143-02, Bioo Scientific), according to  
794 the manufacturer's guidelines. The libraries were then sequenced using an Illumina Novaseq 6000 platform.  
795 The libraries were generated from two sets of biological replicates.

796

## 797 **Antibodies**

798 Antibodies against FLAG (F1804, Sigma Aldrich), IPMK (custom rabbit polyclonal antibody, raised  
799 against a mouse IPMK peptide corresponding to amino acids 295-311 (SKAYSTHTKLYAKKHQS;  
800 Covance)) (S. Kim et al., 2011), SMARCB1 (A301-087, Bethyl), BRG1 (ab110641, Abcam), BAF155  
801 (11956, Cell Signaling Technology), BAF170 (12760, Cell Signaling Technology), BAF250A (12354, Cell  
802 Signaling Technology), BRM (11966, Cell Signaling Technology), PBAF/PBRM (A301-591A, Bethyl), a-  
803 TUBULIN (T5169, Sigma Aldrich), GST (2622, Cell Signaling Technology), LaminB1 (sc-365214, Santa  
804 Cruz Biotech), Histone H3 (homemade), GAPDH (sc-32233, Santa Cruz Biotech), anti-DPF2 (ab128149,  
805 Abcam), anti-SMARCE1 (ab137081, Abcam), anti-SS18L1 (ab227535, Abcam), anti-ACTL6A (sc-  
806 137062, Santa Cruz Biotech), anti-SMARCD1 (sc-135843, Santa Cruz Biotech), anti-BCL7A (HPA019762,  
807 Atlas Antibodies) and anti-ACTB (TA811000, Origene) were used for immunoblotting. Antibodies against  
808 IPMK (homemade), SMARCB1 (A301-087, Bethyl) and normal rabbit IgG (sc-2027, Santa Cruz Biotech)  
809 and anti-FLAG M2 affinity gel (A2220, Sigma Aldrich) were used for immunoprecipitation, and GST (2622,

810 Cell Signaling Technology) was used for pulldown. Antibodies against FLAG (F7425, Sigma Aldrich),  
811 BRG1 (ab110641, Abcam), and IgG (homemade) were used for CUT&RUN assay.

812

### 813 **ATAC-seq**

814 ATAC-seq libraries were prepared as previously described (Buenrostro, Giresi, Zaba, Chang, & Greenleaf,  
815 2013; Buenrostro, Wu, Chang, & Greenleaf, 2015), with minor modification. Briefly, 50,000 mESCs were  
816 harvested, washed with cold PBS, lysed with cold lysis buffer, and immediately centrifuged. The nuclear  
817 pellets were resuspended in 25  $\mu$ l of 2X tagmentation reaction buffer (10 mM Tris, pH 8.0, 5 mM MgCl<sub>2</sub>,  
818 10% dimethylformamide), 23  $\mu$ l of nuclease-free water, and 2  $\mu$ l of Tn5 transposase (in-house generated),  
819 and incubated at 37°C for 30 min. The samples were then immediately purified using a QIAquick PCR  
820 purification kit (28106, Qiagen). The libraries were pre-enriched for five cycles using the KAPA HiFi  
821 Hotstart ready mix (KK2601, Kapa Biosystems), and the threshold cycle (Ct) was monitored using qPCR  
822 to determine the additional enrichment cycles, which were then applied. The final libraries were purified  
823 again with a QIAquick PCR purification kit, and sequenced using an Illumina Novaseq 6000 platform. The  
824 libraries were generated from two sets of biological replicates.

825

### 826 **H3K4me3-Only and bivalent promoter-TSS**

827 The list of 47,382 mouse genes was obtained from the UCSC genome browser (Table browser, mm10,  
828 group: Genes and Gene Prediction, track: NCBI RefSeq, table: UCSC RefSeq (refGene), region: genome).  
829 Among these genes, we selected protein-coding genes (gene name starting with NM\_) that are longer than  
830 2 kb. To classify the promoter-TSS regions precisely, we removed redundancies by merging the genes,  
831 having the exact same transcription start sites (TSS), into the same group. By doing so, we obtained 23,927  
832 mouse promoter-TSS regions. To categorize the promoter-TSS regions depending on their histone  
833 modifications status, we first calculated the H3K4me3 (accession number: GSM254000 and GSM254001)  
834 and H3K27me3 (accession number: GSM254004 and GSM254005) ChIP-seq intensity in a -500/+1,000  
835 bp window around the promoter-TSS regions. The -500/+1,000 bp window range was also applied in a  
836 previous study (de Dieuleveult et al., 2016). Next, we divided the promoter-TSS into two groups based on  
837 the first quartile (Q1) value of H3K4me3 ChIP-seq intensity at the whole promoter-TSS regions;  
838 H3K4me3-Low and H3K4me3-High. We then divided the H3K4me3-High promoter-TSS into two groups  
839 based on the third quartile (Q3) value of H3K27me3 ChIP-seq intensity at the whole promoter-TSS regions;  
840 H3K4me3-Only and bivalent. Thus, we categorized three types of promoter-TSS: 5,982 H3K4me3-Low,  
841 12,305 H3K4me3-Only (high H3K4me3 and low H3K27me3), and 5,640 bivalent (high H3K4me3 and  
842 high H3K27me3). We obtained similar results when using the publically released H3K4me3 and  
843 H3K27me3 ChIP-seq data (ENCODE, Ross Hardison, ENCSR212KGS and ENCSR059MBO).  
844 Furthermore, we confirmed that the percentage of three promoter-TSS types are similar to the results  
845 obtained by a previous study (de Dieuleveult et al., 2016).

846

### 847 **mRNA purification and mRNA-seq**



848 Total RNA was purified from mESCs using the TRIzol reagent (Invitrogen) according to the manufacturer's  
849 instructions. Briefly, mESCs cultured in 6-well plates were harvested and homogenized with 1 ml of TRIzol  
850 reagent. Chloroform (200  $\mu$ L/sample) was then added, and the samples were vigorously mixed by hand for  
851 15 seconds and incubated at 25°C for 2 minutes. The mixtures were centrifuged at 12,000 rpm for 15  
852 minutes at 4°C, and 500  $\mu$ L of each aqueous phase was transferred to a new Eppendorf tube and mixed with  
853 the equal volumes of isopropanol. The mixtures were incubated at 25°C for 10 minutes to precipitate the  
854 total RNA samples. The samples were then centrifuged at 12,000 rpm for 10 minutes at 4°C, washed with  
855 75% ethanol, and centrifuged again at 10,000 rpm for 5 minutes at 4°C. The RNA pellets were dried and  
856 dissolved in RNase-free water. For mRNA sequencing (mRNA-seq) library preparation, mRNA was  
857 isolated from total RNA using a Magnetic mRNA isolation kit (S1550S, NEB), and libraries were prepared  
858 using a NEXTFlex Rapid directional RNA-seq kit (5138-08, Bioo Scientific). The libraries were sequenced  
859 using an Illumina HiSeq 2500 system. The libraries were generated from two sets of biological replicates.

860

### 861 **Gene Ontology analysis**

862 ConsensusPathDB was used to identify gene ontology terms associated with differentially expressed genes  
863 (DEGs) (Herwig et al., 2016).

864

### 865 **Data processing and analysis**

866 For CUT&RUN analysis, raw reads were aligned to the mouse genome (mm10) using Bowtie2 (version  
867 2.2.9) (Langmead & Salzberg, 2012) with the parameter (--trim3 125 --local --very-sensitive-local --no-  
868 unal --no-mixed --no-discordant -q --phred33 -I 10 -X 700), as the previous study (GSM2247138). For  
869 ATAC-seq analysis, raw reads were aligned to the mouse genome (mm10) using Bowtie2 (version 2.2.9)  
870 with the following parameter; --very-sensitive -X 100 --local. For mRNA-seq analysis, raw reads were  
871 aligned to the mouse genome (mm10) using STAR (version 2.5.2a) with default parameters (Dobin et al.,  
872 2013). Generally, we used MACS2 (Zhang et al., 2008) to convert the aligned BAM files into bedGraph  
873 files, and normalized the data with respect to the total read counts. Then, we used bedGraphToBigWig  
874 (Kent, Zweig, Barber, Hinrichs, & Karolchik, 2010) to convert the bedGraph files into bigWig files. The  
875 bigWig files were used as input files for bwtool (Pohl & Beato, 2014) (matrix and aggregate option) to  
876 quantify the intensity (e.g., heatmaps or average line plots) of the relevant sequencing data. All of our raw  
877 data (fastq files) were confirmed to be of good quality using FastQC  
878 (<http://www.bioinformatics.babraham.ac.uk/projects/fastqc/>). For our CUT&RUN analysis, we used  
879 MACS2 (callpeak option, P-value < 0.005) to identify the peaks (or binding sites) of protein of interest by  
880 using IgG as backgrounds. The CUT&RUN data was also subjected to HOMER annotatPeaks.pl (Heinz et  
881 al., 2010) to elucidate the genomic contents within BRG1/IPMK-binding sites. For our mRNA-seq analyses,  
882 we used Cufflinks (Trapnell et al., 2010) (Cuffdiff option, fr-firststrand) to assess the expression levels and  
883 identify DEGs. Box plots, volcano plots, and other plots were drawn with R (ggplot2) (Wickham, 2009)  
884 and heatmaps were drawn with Java TreeView (Saldanha, 2004). The examples of our genome-wide data  
885 were visualized using the Integrative Genomics Viewer (IGV) (Robinson et al., 2011).

886

887 **Public data acquisition**

888 Publicly released CHIP-seq data were downloaded from the NCBI GEO DataSets database. These data were  
889 downloaded as sra or fastq files, and sra files were converted to fastq files using the SRA Toolkit  
890 (<https://trace.ncbi.nlm.nih.gov/Traces/sra/sra.cgi?view=software>). Both the public datasets and our data  
891 were then analyzed using the same methods.

892

893 **DATA AVAILABILITY**

894 The NGS data from this study have been submitted to the NCBI Gene Expression Omnibus (GEO)  
895 (<http://www.ncbi.nlm.nih.gov/geo>) under accession GSE158525.

896

897 **ACKNOWLEDGEMENTS**

898 We thank members of the S.K. and D. L. laboratory for their helpful discussions.

899

900 **FUNDING**

901 This work was supported by TJ Park Science Fellowship of the POSCO TJ Park Foundation (to S.E.P.) and  
902 the National Research Foundation of Korea [NRF-2018R1A5A1024261 to S.K. and D.L.].

903

904 **CONFLICT OF INTERESTS**

905 The authors have no potential conflicts of interest to disclose.

906

907 REFERENCES

- 908 Arnaud, O., Le Loarer, F., & Tirode, F. (2018). BAFfling pathologies: Alterations of BAF complexes in  
909 cancer. *Cancer Lett*, 419, 266-279. doi:10.1016/j.canlet.2018.01.046
- 910 Ashburner, M., Ball, C. A., Blake, J. A., Botstein, D., Butler, H., Cherry, J. M., . . . Sherlock, G. (2000).  
911 Gene ontology: tool for the unification of biology. The Gene Ontology Consortium. *Nat Genet*,  
912 25(1), 25-29. doi:10.1038/75556
- 913 Bang, S., Kim, S., Dailey, M. J., Chen, Y., Moran, T. H., Snyder, S. H., & Kim, S. F. (2012). AMP-  
914 activated protein kinase is physiologically regulated by inositol polyphosphate multikinase. *Proc*  
915 *Natl Acad Sci U S A*, 109(2), 616-620. doi:10.1073/pnas.1119751109
- 916 Bechet, J., Greenson, M., & Wiame, J. M. (1970). Mutations affecting the repressibility of arginine  
917 biosynthetic enzymes in *Saccharomyces cerevisiae*. *Eur J Biochem*, 12(1), 31-39.  
918 doi:10.1111/j.1432-1033.1970.tb00817.x
- 919 Bercy, J., Dubois, E., & Messenguy, F. (1987). Regulation of arginine metabolism in *Saccharomyces*  
920 *cerevisiae*: expression of the three ARGR regulatory genes and cellular localization of their  
921 products. *Gene*, 55(2-3), 277-285. doi:10.1016/0378-1119(87)90287-3
- 922 Blind, R. D. (2014). Disentangling biological signaling networks by dynamic coupling of signaling lipids  
923 to modifying enzymes. *Adv Biol Regul*, 54, 25-38. doi:10.1016/j.jbior.2013.09.015
- 924 Blind, R. D., Sablin, E. P., Kuchenbecker, K. M., Chiu, H. J., Deacon, A. M., Das, D., . . . Ingraham, H. A.  
925 (2014). The signaling phospholipid PIP3 creates a new interaction surface on the nuclear  
926 receptor SF-1. *Proc Natl Acad Sci U S A*, 111(42), 15054-15059. doi:10.1073/pnas.1416740111
- 927 Blind, R. D., Suzawa, M., & Ingraham, H. A. (2012). Direct modification and activation of a nuclear  
928 receptor-PIP<sub>2</sub> complex by the inositol lipid kinase IPMK. *Sci Signal*, 5(229), ra44.  
929 doi:10.1126/scisignal.2003111
- 930 Buenrostro, J. D., Giresi, P. G., Zaba, L. C., Chang, H. Y., & Greenleaf, W. J. (2013). Transposition of  
931 native chromatin for fast and sensitive epigenomic profiling of open chromatin, DNA-binding  
932 proteins and nucleosome position. *Nat Methods*, 10(12), 1213-1218. doi:10.1038/nmeth.2688
- 933 Buenrostro, J. D., Wu, B., Chang, H. Y., & Greenleaf, W. J. (2015). ATAC-seq: A Method for Assaying  
934 Chromatin Accessibility Genome-Wide. *Curr Protoc Mol Biol*, 109, 21.29.21-29.  
935 doi:10.1002/0471142727.mb2129s109
- 936 Burton, A., Azevedo, C., Andreassi, C., Riccio, A., & Saiardi, A. (2013). Inositol pyrophosphates regulate  
937 JMJD2C-dependent histone demethylation. *Proc Natl Acad Sci U S A*, 110(47), 18970-18975.  
938 doi:10.1073/pnas.1309699110
- 939 Chakraborty, A., Kim, S., & Snyder, S. H. (2011). Inositol pyrophosphates as mammalian cell signals. *Sci*  
940 *Signal*, 4(188), re1. doi:10.1126/scisignal.2001958
- 941 Christ, C., & Tye, B. K. (1991). Functional domains of the yeast transcription/replication factor MCM1.  
942 *Genes Dev*, 5(5), 751-763. doi:10.1101/gad.5.5.751
- 943 de Dieuleveult, M., Yen, K., Hmitou, I., Depaux, A., Boussouar, F., Bou Dargham, D., . . . Gerard, M.  
944 (2016). Genome-wide nucleosome specificity and function of chromatin remodellers in ES cells.  
945 *Nature*, 530(7588), 113-116. doi:10.1038/nature16505
- 946 Dignam, J. D., Lebovitz, R. M., & Roeder, R. G. (1983). Accurate transcription initiation by RNA  
947 polymerase II in a soluble extract from isolated mammalian nuclei. *Nucleic acids research*,  
948 11(5), 1475-1489. doi:10.1093/nar/11.5.1475
- 949 Dobin, A., Davis, C. A., Schlesinger, F., Drenkow, J., Zaleski, C., Jha, S., . . . Gingeras, T. R. (2013).  
950 STAR: ultrafast universal RNA-seq aligner. *Bioinformatics*, 29(1), 15-21.  
951 doi:10.1093/bioinformatics/bts635
- 952 Dubois, E., Bercy, J., & Messenguy, F. (1987). Characterization of two genes, ARGRI and ARGRIII  
953 required for specific regulation of arginine metabolism in yeast. *Mol Gen Genet*, 207(1), 142-  
954 148. doi:10.1007/bf00331501
- 955 Hargreaves, D. C., & Crabtree, G. R. (2011). ATP-dependent chromatin remodeling: genetics, genomics  
956 and mechanisms. *Cell Res*, 21(3), 396-420. doi:10.1038/cr.2011.32
- 957 Hatch, A. J., & York, J. D. (2010). SnapShot: Inositol phosphates. *Cell*, 143(6), 1030-1030.e1031.  
958 doi:10.1016/j.cell.2010.11.045
- 959 He, S., Wu, Z., Tian, Y., Yu, Z., Yu, J., Wang, X., . . . Xu, Y. (2020). Structure of nucleosome-bound  
960 human BAF complex. *Science*, 367(6480), 875-881. doi:10.1126/science.aaz9761
- 961 Heinz, S., Benner, C., Spann, N., Bertolino, E., Lin, Y. C., Laslo, P., . . . Glass, C. K. (2010). Simple

- 962 combinations of lineage-determining transcription factors prime cis-regulatory elements required  
963 for macrophage and B cell identities. *Mol Cell*, 38(4), 576-589.  
964 doi:10.1016/j.molcel.2010.05.004
- 965 Helming, K. C., Wang, X., & Roberts, C. W. M. (2014). Vulnerabilities of mutant SWI/SNF complexes in  
966 cancer. *Cancer Cell*, 26(3), 309-317. doi:10.1016/j.ccr.2014.07.018
- 967 Herwig, R., Hardt, C., Lienhard, M., & Kamburov, A. (2016). Analyzing and interpreting genome data at  
968 the network level with ConsensusPathDB. *Nat Protoc*, 11(10), 1889-1907.  
969 doi:10.1038/nprot.2016.117
- 970 Ho, L., Jothi, R., Ronan, J. L., Cui, K., Zhao, K., & Crabtree, G. R. (2009). An embryonic stem cell  
971 chromatin remodeling complex, esBAF, is an essential component of the core pluripotency  
972 transcriptional network. *Proc Natl Acad Sci U S A*, 106(13), 5187-5191.  
973 doi:10.1073/pnas.0812888106
- 974 Ho, L., Ronan, J. L., Wu, J., Staahl, B. T., Chen, L., Kuo, A., . . . Crabtree, G. R. (2009). An embryonic  
975 stem cell chromatin remodeling complex, esBAF, is essential for embryonic stem cell self-  
976 renewal and pluripotency. *Proc Natl Acad Sci U S A*, 106(13), 5181-5186.  
977 doi:10.1073/pnas.0812889106
- 978 Hodges, C., Kirkland, J. G., & Crabtree, G. R. (2016). The Many Roles of BAF (mSWI/SNF) and PBAF  
979 Complexes in Cancer. *Cold Spring Harb Perspect Med*, 6(8). doi:10.1101/cshperspect.a026930
- 980 Jackson, S. G., Al-Saigh, S., Schultz, C., & Junop, M. S. (2011). Inositol pentakisphosphate isomers bind  
981 PH domains with varying specificity and inhibit phosphoinositide interactions. *BMC Struct Biol*,  
982 11, 11. doi:10.1186/1472-6807-11-11
- 983 Kent, W. J., Zweig, A. S., Barber, G., Hinrichs, A. S., & Karolchik, D. (2010). BigWig and BigBed:  
984 enabling browsing of large distributed datasets. *Bioinformatics*, 26(17), 2204-2207.  
985 doi:10.1093/bioinformatics/btq351
- 986 Khavari, P. A., Peterson, C. L., Tamkun, J. W., Mendel, D. B., & Crabtree, G. R. (1993). BRG1 contains a  
987 conserved domain of the SWI2/SNF2 family necessary for normal mitotic growth and  
988 transcription. *Nature*, 366(6451), 170-174. doi:10.1038/366170a0
- 989 Kim, E., Ahn, H., Kim, M. G., Lee, H., & Kim, S. (2017). The Expanding Significance of Inositol  
990 Polyphosphate Multikinase as a Signaling Hub. *Mol Cells*, 40(5), 315-321.  
991 doi:10.14348/molcells.2017.0066
- 992 Kim, E., Beon, J., Lee, S., Park, S. J., Ahn, H., Kim, M. G., . . . Kim, S. (2017). Inositol polyphosphate  
993 multikinase promotes Toll-like receptor-induced inflammation by stabilizing TRAF6. *Sci Adv*,  
994 3(4), e1602296. doi:10.1126/sciadv.1602296
- 995 Kim, E., Tyagi, R., Lee, J. Y., Park, J., Kim, Y. R., Beon, J., . . . Kim, S. (2013). Inositol polyphosphate  
996 multikinase is a coactivator for serum response factor-dependent induction of immediate early  
997 genes. *Proc Natl Acad Sci U S A*, 110(49), 19938-19943. doi:10.1073/pnas.1320171110
- 998 Kim, J., & Roeder, R. G. (2011). Nucleosomal H2B ubiquitylation with purified factors. *Methods (San*  
999 *Diego, Calif.)*, 54(3), 331-338. doi:10.1016/j.ymeth.2011.03.009
- 1000 Kim, K. H., & Roberts, C. W. (2014). Mechanisms by which SMARCB1 loss drives rhabdoid tumor  
1001 growth. *Cancer Genet*, 207(9), 365-372. doi:10.1016/j.cancergen.2014.04.004
- 1002 Kim, S., Kim, S. F., Maag, D., Maxwell, M. J., Resnick, A. C., Juluri, K. R., . . . Snyder, S. H. (2011).  
1003 Amino acid signaling to mTOR mediated by inositol polyphosphate multikinase. *Cell Metab*,  
1004 13(2), 215-221. doi:10.1016/j.cmet.2011.01.007
- 1005 Kouzarides, T. (2007). Chromatin modifications and their function. *Cell*, 128(4), 693-705.  
1006 doi:10.1016/j.cell.2007.02.005
- 1007 Kwak, C., Shin, S., Park, J. S., Jung, M., Nhung, T. T. M., Kang, M. G., . . . Rhee, H. W. (2020). Contact-  
1008 ID, a tool for profiling organelle contact sites, reveals regulatory proteins of mitochondrial-  
1009 associated membrane formation. *Proc Natl Acad Sci U S A*, 117(22), 12109-12120.  
1010 doi:10.1073/pnas.1916584117
- 1011 Langmead, B., & Salzberg, S. L. (2012). Fast gapped-read alignment with Bowtie 2. *Nat Methods*, 9(4),  
1012 357-359. doi:10.1038/nmeth.1923
- 1013 Lee, B., Park, S. J., Lee, S., Park, S. E., Lee, E., Song, J. J., . . . Kim, S. (2020). Identification of the  
1014 Antidepressant Vilazodone as an Inhibitor of Inositol Polyphosphate Multikinase by Structure-  
1015 Based Drug Repositioning. *Mol Cells*, 43(3), 222-227. doi:10.14348/molcells.2020.0051
- 1016 Lee, S. Y., Kang, M. G., Shin, S., Kwak, C., Kwon, T., Seo, J. K., . . . Rhee, H. W. (2017). Architecture  
1017 Mapping of the Inner Mitochondrial Membrane Proteome by Chemical Tools in Live Cells. *J Am*  
1018 *Chem Soc*, 139(10), 3651-3662. doi:10.1021/jacs.6b10418

- 1019 Liu, P., Qi, X., Bian, C., Yang, F., Lin, X., Zhou, S., . . . Yi, T. (2017). MicroRNA-18a inhibits ovarian  
1020 cancer growth via directly targeting TRIAP1 and IPMK. *Oncol Lett*, *13*(6), 4039-4046.  
1021 doi:10.3892/ol.2017.5961
- 1022 Maag, D., Maxwell, M. J., Hardesty, D. A., Boucher, K. L., Choudhari, N., Hanno, A. G., . . . Resnick, A.  
1023 C. (2011). Inositol polyphosphate multikinase is a physiologic PI3-kinase that activates  
1024 Akt/PKB. *Proceedings of the National Academy of Sciences*, *108*(4), 1391-1396.  
1025 doi:10.1073/pnas.1017831108
- 1026 Malabanan, M. M., & Blind, R. D. (2016). Inositol polyphosphate multikinase (IPMK) in transcriptional  
1027 regulation and nuclear inositide metabolism. *Biochem Soc Trans*, *44*(1), 279-285.  
1028 doi:10.1042/bst20150225
- 1029 Marino, M. M., Rega, C., Russo, R., Valletta, M., Gentile, M. T., Esposito, S., . . . Pedone, P. V. (2019).  
1030 Interactome mapping defines BRG1, a component of the SWI/SNF chromatin remodeling  
1031 complex, as a new partner of the transcriptional regulator CTCF. *J Biol Chem*, *294*(3), 861-873.  
1032 doi:10.1074/jbc.RA118.004882
- 1033 Meers, M. P., Bryson, T. D., Henikoff, J. G., & Henikoff, S. (2019). Improved CUT&RUN chromatin  
1034 profiling tools. *Elife*, *8*. doi:10.7554/eLife.46314
- 1035 Messenguy, F., & Dubois, E. (1993). Genetic evidence for a role for MCM1 in the regulation of arginine  
1036 metabolism in *Saccharomyces cerevisiae*. *Mol Cell Biol*, *13*(4), 2586-2592.  
1037 doi:10.1128/mcb.13.4.2586
- 1038 Nesvizhskii, A. I., Keller, A., Kolker, E., & Aebersold, R. (2003). A statistical model for identifying  
1039 proteins by tandem mass spectrometry. *Anal Chem*, *75*(17), 4646-4658. doi:10.1021/ac0341261
- 1040 Odom, A. R., Stahlberg, A., Wente, S. R., & York, J. D. (2000). A role for nuclear inositol 1,4,5-  
1041 trisphosphate kinase in transcriptional control. *Science*, *287*(5460), 2026-2029.
- 1042 Piccolo, E., Vignati, S., Maffucci, T., Innominato, P. F., Riley, A. M., Potter, B. V., . . . Falasca, M. (2004).  
1043 Inositol pentakisphosphate promotes apoptosis through the PI 3-K/Akt pathway. *Oncogene*,  
1044 *23*(9), 1754-1765. doi:10.1038/sj.onc.1207296
- 1045 Pohl, A., & Beato, M. (2014). bwtool: a tool for bigWig files. *Bioinformatics*, *30*(11), 1618-1619.  
1046 doi:10.1093/bioinformatics/btu056
- 1047 Razzini, G., Berrie, C. P., Vignati, S., Broggin, M., Mascetta, G., Brancaccio, A., & Falasca, M. (2000).  
1048 Novel functional PI 3-kinase antagonists inhibit cell growth and tumorigenicity in human cancer  
1049 cell lines. *Faseb j*, *14*(9), 1179-1187. doi:10.1096/fasebj.14.9.1179
- 1050 Resnick, A. C., Snowman, A. M., Kang, B. N., Hurt, K. J., Snyder, S. H., & Saiardi, A. (2005). Inositol  
1051 polyphosphate multikinase is a nuclear PI3-kinase with transcriptional regulatory activity. *Proc  
1052 Natl Acad Sci U S A*, *102*(36), 12783-12788. doi:10.1073/pnas.0506184102
- 1053 Roberts, C. W., Galusha, S. A., McMenamin, M. E., Fletcher, C. D., & Orkin, S. H. (2000).  
1054 Haploinsufficiency of *Snf5* (integrase interactor 1) predisposes to malignant rhabdoid tumors in  
1055 mice. *Proc Natl Acad Sci U S A*, *97*(25), 13796-13800. doi:10.1073/pnas.250492697
- 1056 Roberts, C. W., Leroux, M. M., Fleming, M. D., & Orkin, S. H. (2002). Highly penetrant, rapid  
1057 tumorigenesis through conditional inversion of the tumor suppressor gene *Snf5*. *Cancer Cell*,  
1058 *2*(5), 415-425. doi:10.1016/s1535-6108(02)00185-x
- 1059 Roberts, C. W., & Orkin, S. H. (2004). The SWI/SNF complex--chromatin and cancer. *Nat Rev Cancer*,  
1060 *4*(2), 133-142. doi:10.1038/nrc1273
- 1061 Robinson, J. T., Thorvaldsdóttir, H., Winckler, W., Guttman, M., Lander, E. S., Getz, G., & Mesirov, J. P.  
1062 (2011). Integrative genomics viewer. *Nat Biotechnol*, *29*(1), 24-26. doi:10.1038/nbt.1754
- 1063 Saiardi, A., Erdjument-Bromage, H., Snowman, A. M., Tempst, P., & Snyder, S. H. (1999). Synthesis of  
1064 diphosphoinositol pentakisphosphate by a newly identified family of higher inositol  
1065 polyphosphate kinases. *Curr Biol*, *9*(22), 1323-1326.
- 1066 Saldanha, A. J. (2004). Java Treeview--extensible visualization of microarray data. *Bioinformatics*,  
1067 *20*(17), 3246-3248. doi:10.1093/bioinformatics/bth349
- 1068 Savic, D., Partridge, E. C., Newberry, K. M., Smith, S. B., Meadows, S. K., Roberts, B. S., . . . Myers, R.  
1069 M. (2015). CETCh-seq: CRISPR epitope tagging ChIP-seq of DNA-binding proteins. *Genome  
1070 Res*, *25*(10), 1581-1589. doi:10.1101/gr.193540.115
- 1071 Sei, Y., Zhao, X., Forbes, J., Szymczak, S., Li, Q., Trivedi, A., . . . Wank, S. A. (2015). A Hereditary Form  
1072 of Small Intestinal Carcinoid Associated With a Germline Mutation in Inositol Polyphosphate  
1073 Multikinase. *Gastroenterology*, *149*(1), 67-78. doi:10.1053/j.gastro.2015.04.008
- 1074 Shen, X., Xiao, H., Ranallo, R., Wu, W.-H., & Wu, C. (2003). Modulation of ATP-Dependent Chromatin-  
1075 Remodeling Complexes by Inositol Polyphosphates. *Science*, *299*(5603), 112-114.

- 1076 doi:10.1126/science.1078068  
1077 Skene, P. J., & Henikoff, S. (2017). An efficient targeted nuclease strategy for high-resolution mapping of  
1078 DNA binding sites. *Elife*, 6. doi:10.7554/eLife.21856  
1079 Spaeth, J. M., Liu, J. H., Peters, D., Guo, M., Osipovich, A. B., Mohammadi, F., . . . Stein, R. (2019). The  
1080 Pdx1-Bound Swi/Snf Chromatin Remodeling Complex Regulates Pancreatic Progenitor Cell  
1081 Proliferation and Mature Islet  $\beta$ -Cell Function. *Diabetes*, 68(9), 1806-1818. doi:10.2337/db19-  
1082 0349  
1083 Steger, D. J., Haswell, E. S., Miller, A. L., Wenthe, S. R., & O'Shea, E. K. (2003). Regulation of chromatin  
1084 remodeling by inositol polyphosphates. *Science*, 299(5603), 114-116.  
1085 doi:10.1126/science.1078062  
1086 Tolstorukov, M. Y., Sansam, C. G., Lu, P., Koellhoffer, E. C., Helming, K. C., Alver, B. H., . . . Roberts,  
1087 C. W. M. (2013). Swi/Snf chromatin remodeling/tumor suppressor complex establishes  
1088 nucleosome occupancy at target promoters. *Proceedings of the National Academy of Sciences*,  
1089 110(25), 10165-10170. doi:10.1073/pnas.1302209110  
1090 Trapnell, C., Williams, B. A., Pertea, G., Mortazavi, A., Kwan, G., van Baren, M. J., . . . Pachter, L.  
1091 (2010). Transcript assembly and quantification by RNA-Seq reveals unannotated transcripts and  
1092 isoform switching during cell differentiation. *Nat Biotechnol*, 28(5), 511-515.  
1093 doi:10.1038/nbt.1621  
1094 Trotter, K. W., & Archer, T. K. (2007). Nuclear receptors and chromatin remodeling machinery. *Mol Cell*  
1095 *Endocrinol*, 265-266, 162-167. doi:10.1016/j.mce.2006.12.015  
1096 Vignali, M., Hassan, A. H., Neely, K. E., & Workman, J. L. (2000). ATP-dependent chromatin-remodeling  
1097 complexes. *Mol Cell Biol*, 20(6), 1899-1910. doi:10.1128/mcb.20.6.1899-1910.2000  
1098 Wang, W., Côté, J., Xue, Y., Zhou, S., Khavari, P. A., Biggar, S. R., . . . Crabtree, G. R. (1996).  
1099 Purification and biochemical heterogeneity of the mammalian SWI-SNF complex. *Embo j*,  
1100 15(19), 5370-5382.  
1101 Wang, W., Xue, Y., Zhou, S., Kuo, A., Cairns, B. R., & Crabtree, G. R. (1996). Diversity and  
1102 specialization of mammalian SWI/SNF complexes. *Genes Dev*, 10(17), 2117-2130.  
1103 doi:10.1101/gad.10.17.2117  
1104 Wang, X., Haswell, J. R., & Roberts, C. W. (2014). Molecular pathways: SWI/SNF (BAF) complexes are  
1105 frequently mutated in cancer--mechanisms and potential therapeutic insights. *Clin Cancer Res*,  
1106 20(1), 21-27. doi:10.1158/1078-0432.Ccr-13-0280  
1107 Wickham, H. (2009). *ggplot2: Elegant Graphics for Data Analysis*: Springer-Verlag New York.  
1108 Xu, R., Paul, B. D., Smith, D. R., Tyagi, R., Rao, F., Khan, A. B., . . . Snyder, S. H. (2013). Inositol  
1109 polyphosphate multikinase is a transcriptional coactivator required for immediate early gene  
1110 induction. *Proc Natl Acad Sci U S A*, 110(40), 16181-16186. doi:10.1073/pnas.1315551110  
1111 Xu, R., Sen, N., Paul, B. D., Snowman, A. M., Rao, F., Vandiver, M. S., . . . Snyder, S. H. (2013). Inositol  
1112 polyphosphate multikinase is a coactivator of p53-mediated transcription and cell death. *Sci*  
1113 *Signal*, 6(269), ra22. doi:10.1126/scisignal.2003405  
1114 Xu, R., & Snyder, S. H. (2013). Gene transcription by p53 requires inositol polyphosphate multikinase as  
1115 a co-activator. *Cell Cycle*, 12(12), 1819-1820. doi:10.4161/cc.25119  
1116 Zhang, Y., Liu, T., Meyer, C. A., Eeckhoute, J., Johnson, D. S., Bernstein, B. E., . . . Liu, X. S. (2008).  
1117 Model-based analysis of ChIP-Seq (MACS). *Genome Biol*, 9(9), R137. doi:10.1186/gb-2008-9-  
1118 9-r137  
1119 Zhong, L., Martinez-Pastor, B., Silberman, D. M., Sebastian, C., & Mostoslavsky, R. (2013). Assaying  
1120 chromatin sirtuins. *Methods Mol Biol*, 1077, 149-163. doi:10.1007/978-1-62703-637-5\_10  
1121  
1122

1123 **TABLE AND FIGURES LEGENDS**

1124

1125 **Figure 1. Identification of SMARCB1 as an IPMK-interacting protein via unbiased screening assays.**

1126 (A) IPMK and SMARCB1 interaction test in yeast strain AH109, containing two reporter genes (*ADE2* and  
1127 *HIS3*). Yeast cells were co-transformed with either the GAL4-BD fusion plasmid pGBKT7 or pGBKT7-  
1128 IPMK and the GAL4-AD fusion plasmid pACT2-SMARCB1. The yeast cells were spread on a selection  
1129 medium lacking leucine and tryptophan (SD-LW) to select co-transformants of bait and prey vectors.  
1130 Specific interactions between bait and prey proteins were monitored by cell growth on a selection medium  
1131 lacking leucine, tryptophan, adenine (SD-LWA), or a selection medium lacking leucine, tryptophan,  
1132 histidine (SD-LWH). 3-AT (3-amino-1,2,4-triazole) was used to suppress leaky *HIS3* expression in  
1133 transformants to obtain an accurate phenotype. Polypyrimidine tract binding protein (PTB) gene fused with  
1134 the GAL4 DNA binding domain (BD-PTB) and PTB gene fused with the GAL4 activation domain (AD-  
1135 PTB) were used as positive controls of bait and prey vectors, respectively. The negative control is the cells  
1136 transformed with parental bait vector (pGBKT7) and prey vector (pACT2).

1137 (B) A schematic diagram displaying identification strategy of IPMK-proximal/interacting proteins, which  
1138 are biotinylated by APEX-tagged IPMK.

1139 (C) Bar graphs showing the relative abundance of biotinylated proteins related to SWI/SNF complex and  
1140 two negative controls (left). Target proteins were arranged according to their significance (*P*-value, left:  
1141 significant; right: not significant). A volcano plot showing the relative abundance and significance (*P*-value)  
1142 of biotinylated proteins related to SWI/SNF complex and two negative controls (right). A dotted line within  
1143 the volcano plot indicates the *P*-value = 0.05. The relative abundance (abundance ratio) was derived by  
1144 comparing the fold enrichment of target proteins in IPMK-APEX2-expressed to APEX2-expressed  
1145 HEK293 cells. *P*-value was calculated using Student's t-test.

1146

1147 **Figure 2. IPMK binds to SMARCB1 and other components of the SWI/SNF complex.**

1148 (A) Purified IPMK and *in vitro* translated FLAG-SMARCB1 were co-incubated, immunoprecipitated with  
1149 FLAG antibody, and subjected to immunoblotting.

1150 (B) Sf9 insect cells were co-infected with baculoviruses expressing FLAG-IPMK and individual subunits  
1151 of SWI/SNF complex (SMARCB1, BRG1, BAF155, and BAF170), followed by FLAG M2 agarose  
1152 immunoprecipitation and immunoblotting.

1153 (C) IPMK and IgG were immunoprecipitated from E14Tg2a cells and subjected to immunoblotting.

1154 (D) SMARCB1 and IgG were immunoprecipitated from E14Tg2a cells and subjected to immunoblotting.

1155 (E) E14Tg2a cells were transfected with FLAG-IPMK or FLAG (a control vector), followed by FLAG  
1156 immunoprecipitation and immunoblotting.

1157 (F) E14Tg2a cells were transfected with siRNA against *Egfp* (*Egfp*KD) and *Ipmk* (*Ipmk*KD),  
1158 immunoprecipitated with IPMK and IgG, and subjected to immunoblotting.

1159

1160 **Figure 3. Identification of distinct domains required for IPMK-SMARCB1 interactions.**



1161 (A) A schematic diagram of the human SMARCB1 fragments used for the binding studies (B and C). The  
1162 IPMK-binding sites (Rpt1 and Rpt2) are highlighted in red.  
1163 (B) HEK293T cells were co-transfected with GST-IPMK and FLAG (a control vector) or FLAG-  
1164 SMARCB1 fragments, followed by immunoprecipitation with FLAG antibody, and subjected to  
1165 immunoblotting.  
1166 (C and D) HEK293T cells were co-transfected with FLAG-IPMK and GST (a control vector) or GST-  
1167 SMARCB1 fragments, followed by immunoprecipitation with FLAG antibody, and subjected to  
1168 immunoblotting. The specific IPMK-binding SMARCB1 fragments are highlighted in bold.  
1169 (E) A schematic diagram of the human SMARCB1 domains. SMARCB1 fragments used for the binding  
1170 studies (D) are indicated below with the numbers of amino acid sequences. The specific IPMK-binding  
1171 SMARCB1 fragments (Rpt1 and Rpt2) are highlighted in red.  
1172 (F) HEK293T cells were co-transfected with FLAG-SMARCB1 and GST (a control vector) or GST-IPMK  
1173 fragments, followed by immunoprecipitation with FLAG antibody, and subjected to immunoblotting.  
1174 (G) A schematic diagram of human IPMK domains. IPMK fragments used for the binding studies (F) are  
1175 indicated below with the numbers of amino acid sequences. Key domains for inositol binding (IP), kinase  
1176 activity (SSLL and IDF), and nuclear localization signal (NLS) are depicted. The specific SMARCB1-  
1177 binding IPMK fragments (Exon3, 4, and 6) are highlighted in blue.

1178

1179 **Figure 4. IPMK-BRG1 are co-localized at promoter-TSS, and IPMK regulates BRG1 localization.**

1180 (A) E14Tg2a cells were transfected with siRNA against *Egfp* (*Egfp*KD) and *Ipmk* (*Ipmk*KD) and then  
1181 fractionated into the cytoplasm, nucleoplasm, and chromatin fractions. Immunoblotting with IPMK,  
1182 SMARCB1, BRG1, and fractionation markers was then performed.  
1183 (B) Examples of CUT&RUN assays in E14Tg2a cells, including representative results for BRG1 (*Egfp*KD  
1184 and *Ipmk*KD), IPMK, and IgG. The BRG1 CUT&RUN peak (*Egfp*KD cells) is marked as a blue box on  
1185 top.  
1186 (C) Heatmaps representing CUT&RUN results for BRG1 (*Egfp*KD, *Ipmk*KD, and their comparison), IPMK,  
1187 and IgG at BRG1 CUT&RUN peaks (*Egfp*KD cells) as indicated on top. All heatmaps were aligned at  
1188 34,634 BRG1 CUT&RUN peaks (rows) and sorted in descending order by the BRG1 intensity of *Egfp*KD  
1189 cells.  
1190 (D) Bar graphs showing the Log<sub>2</sub> enrichment of CUT&RUN peaks (IPMK and BRG1-*Egfp*KD, -*Ipmk*KD)  
1191 annotated with various regions of the mouse genome.  
1192 (E) Bar graphs showing the significance (Log *P*-value) of CUT&RUN peaks (IPMK and BRG1-*Egfp*KD,  
1193 -*Ipmk*KD) annotated with various regions of the mouse genome. For each CUT&RUN peak, genome  
1194 annotations (e.g., promoters or CpG islands) are sorted in descending order according to their significance  
1195 (*P*-values, top-bottom, whereas top-more significant and bottom-less significant).  
1196 (F) Examples of BRG1 (*Egfp*KD and *Ipmk*KD), IPMK, IgG CUT&RUN, and ATAC-seq (*Egfp*KD and  
1197 *Ipmk*KD) assays in E14Tg2a cells. The BRG1 CUT&RUN peak (*Egfp*KD cells) and ATAC-seq peaks are  
1198 marked as blue and green boxes on top. Major BRG1 peak (the most enriched site) and transcription start

1199 site (TSS) are indicated as black and red dotted lines.  
1200 (G) Heatmaps representing BRG1 CUT&RUN (*Egfp*KD, *Ipmk*KD, and their comparison) at BRG1  
1201 CUT&RUN peaks (*Egfp*KD cells) assigned with nearby (within 2kb) ATAC-seq peaks (left). BRG1 peaks  
1202 without nearby ATAC-seq peaks were excluded. In order to match the arrangement with ATAC-seq peaks  
1203 (right), a BRG1 peak containing multiple ATAC-seq peaks was included without deduplication. Heatmaps  
1204 representing ATAC-seq signals (*Egfp*KD, *Ipmk*KD, and their comparison) at ATAC-seq peaks assigned with  
1205 closest BRG1 CUT&RUN peaks that were used for heatmaps on the left (right). All heatmaps were aligned  
1206 at 36,481 BRG1 CUT&RUN peaks (left) or 36,481 ATAC-seq peaks (right) and sorted in descending order  
1207 by the BRG1 intensity of *Egfp*KD cells. High and Low groups were divided equally (n=18240 and 18241,  
1208 respectively) according to the BRG1 intensity of *Egfp*KD cells.  
1209 (H) Box plots showing the differential BRG1 (left) and ATAC (right) intensity upon *Ipmk*KD at High (grey)  
1210 and Low (red) BRG1 CUT&RUN peaks (left) and corresponding (closest) ATAC-seq peaks (right). High  
1211 and Low groups (n=18240 and 18241, respectively) were divided according to the BRG1 intensity of  
1212 *Egfp*KD cells.  
1213 (I) Box plots showing the differential BRG1 (left) and ATAC (right) intensity upon *Ipmk*KD at High (grey)  
1214 and Low (red) BRG1 CUT&RUN peaks localized at Promoter-TSS (left) and corresponding (closest)  
1215 ATAC-seq peaks (right). High and Low groups (n=5,800 and 2,618, respectively) were derived from (G  
1216 and H).  
1217 (H and I) *P*-values were calculated using the Wilcoxon rank sum test.  
1218  
1219 **Figure 5. IPMK affects chromatin accessibility at promoter-TSS by regulating the BRG1 localization.**  
1220 (A) Line plots showing the average enrichments of BRG1, nucleosome (MNase-seq, GSM5253962 and  
1221 GSM5253963), and ATAC-seq signals (ATAC) at TSS of total genes (left) and TSS of three promoter types  
1222 (right). Three genomic regions, indicated on top (see also dotted lines on left), were defined according to  
1223 the relative position of enriched ATAC-seq intensity (Center, purple) and enriched BRG1 intensity  
1224 (Upstream and Downstream, red and orange, respectively). Green, red, and blue lines on the right indicate  
1225 H3K4me3-Low, H3K4me3-Only, and bivalent promoters, respectively.  
1226 (B) Bar graphs showing the number of TSS (TSS exhibiting decreased BRG1 intensity upon *Ipmk*KD) with  
1227 different promoter types.  
1228 (C) A diagram displaying five clusters of TSS classified by changes in BRG1 level at Up/Downstream  
1229 regions (defined in (A)) upon *Ipmk*KD (left). Arrows with downwards and upwards indicate decreased and  
1230 increased BRG1 level upon *Ipmk*KD, respectively. Bar graphs showing the number of five TSS clusters  
1231 (middle) with different promoter types (right).  
1232 (D) Line plots showing the average enrichments of BRG1 (*Egfp*KD and *Ipmk*KD) and IgG at TSS with two  
1233 promoter types (see the total on left, H3K4me3-Only and bivalent promoters are shown on top and bottom,  
1234 respectively) and with five TSS clusters. Black, red, and gray lines indicate BRG1 intensity upon *Egfp*KD,  
1235 *Ipmk*KD, and IgG intensity, respectively.  
1236 (E) Bar graphs showing the average of differential ATAC-seq intensity ( $\text{Log}_2 \text{KD}/\text{EgfpKD}$ ) upon *Ipmk*KD

1237 (blue) and *Brg1*KD (green) at TSS with two promoter types.  
1238 (F) Bar graphs showing the average of differential ATAC-seq intensity ( $\text{Log}_2 \text{KD}/\text{EgfpKD}$ ) upon *Ipmk*KD  
1239 (blue) and *Brg1*KD (green) at five TSS clusters with H3K4me3-Only (left) and bivalent promoters (right).  
1240 (E and F) *P*-values were derived using Wilcoxon signed rank test (\* $P < 0.01$ ; \*\* $P < 1 \times 10^{-4}$ ; \*\*\* $P < 1 \times 10^{-10}$ ;  
1241 ns, not significant).  
1242 (G) Examples of BRG1 (*Egfp*KD and *Ipmk*KD), IPMK, IgG CUT&RUN, and ATAC-seq (*Egfp*KD,  
1243 *Ipmk*KD, Control, and *Brg1*KD) assays at TSS of *Adpgk* (left), *Htatsf1* (middle), and *Zfp942/943* (right).  
1244 Center and Up/Downstream regions are marked as purple and red/orange boxes on top, respectively. TSS  
1245 are marked with red boxes (bottom) and dotted lines.  
1246 (H) Examples of BRG1 (*Egfp*KD and *Ipmk*KD), IPMK, IgG CUT&RUN, and ATAC-seq (*Egfp*KD,  
1247 *Ipmk*KD, Control, and *Brg1*KD) assays at TSS of *Xkr4*. The BRG1 CUT&RUN peaks (*Egfp*KD cells) and  
1248 ATAC-seq peaks are marked as blue and green boxes on top. Center and Up/Downstream regions are  
1249 marked as purple and red/orange boxes on top, respectively. TSS is marked with a red box (bottom) and a  
1250 dotted line.  
1251  
1252 **Figure 6. Alteration in BRG1/ATAC upon *Ipmk*KD affects gene expression, and IPMK-SMARCB1**  
1253 **regulates a common set of genes.**  
1254 (A) RT-qPCR analysis of *Ipmk* expression after siRNA treatment. Error bars denote the standard deviation  
1255 obtained from four biological replicates. The expression levels were normalized with respect to that of  $\beta$ -  
1256 actin. *P*-value was calculated using Student's t-test.  
1257 (B) Examples of BRG1 (*Egfp*KD and *Ipmk*KD), IPMK CUT&RUN, and ATAC-seq (*Egfp*KD, *Ipmk*KD,  
1258 Control, and *Brg1*KD) assays at TSS of *Nmrall* (left) and *Phactr3* (right). The BRG1 CUT&RUN peaks  
1259 (*Egfp*KD cells) and ATAC-seq peaks are marked as blue and green boxes on top. TSS are marked with red  
1260 boxes (bottom) and dotted lines. RT-qPCR analysis of *Nmrall* (left) and *Phactr3* (right) expression after  
1261 siRNA treatment. Error bars denote the standard deviation obtained from four biological replicates. The  
1262 expression levels were normalized with respect to that of  $\beta$ -actin. *P*-value was calculated using Student's t-  
1263 test.  
1264 (C) Volcano plots showing the differentially expressed genes (DEGs) upon *Ipmk*KD, identified based on  
1265 mRNA-seq data. Red and blue dots indicate DEGs that were found to be significantly up- and down-  
1266 regulated, respectively ( $P$ -value  $\leq 0.05$  and fold change  $\geq 1.5$ ).  
1267 (D) Bar graphs showing the average of differential BRG1 (red) and ATAC-seq (blue) intensity upon  
1268 *Ipmk*KD at BRG1 CUT&RUN peaks (for BRG1 intensity) and at ATAC-seq peaks (for ATAC intensity)  
1269 that are closest (within 2kb for BRG1 peaks and within 500bp for ATAC-seq peaks) to the TSS of down-  
1270 regulated DEGs. *P*-values were derived using Wilcoxon signed rank test (\*\* $P < 1 \times 10^{-5}$ ; \*\*\* $P < 1 \times 10^{-10}$ ).  
1271 (E) mRNA-seq analysis of *Phactr3* expression after siRNA treatment. *P*-value was calculated using  
1272 Student's t-test.  
1273 (F) Examples of BRG1 (*Egfp*KD and *Ipmk*KD), IPMK CUT&RUN, and ATAC-seq (*Egfp*KD, *Ipmk*KD,

1274 Control, and *Brg1*KD) assays at TSS of *Lrrc61* (left) and *Arhgap44* (right). The BRG1 CUT&RUN peaks  
1275 (*Egfp*KD cells) and ATAC-seq peaks are marked as blue and green boxes on top. TSS are marked with red  
1276 boxes (bottom) and dotted lines. mRNA-seq analysis of *Lrrc61* (left) and *Arhgap44* (right) expression after  
1277 siRNA treatment. *P*-value was calculated using Student's t-test.  
1278 (G) Volcano plots showing the differentially expressed genes (DEGs) upon *Smarb1*KD, identified based  
1279 on mRNA-seq data. Red and blue dots indicate DEGs that were found to be significantly up- and down-  
1280 regulated, respectively ( $P$ -value  $\leq 0.05$  and fold change  $\geq 1.5$ ).  
1281 (H) Heatmaps representing differential gene expression ( $\log_2$  (KD/*Egfp*KD)) of up-regulated (clusters 1, 2,  
1282 and 3) and down-regulated (clusters 4, 5, and 6) DEGs upon *Ipmk*KD. The heatmaps are classified into six  
1283 clusters based on the differential gene expression of *Ipmk*KD and *Smarb1*KD cells.  
1284 (I) Pie chart showing the proportion of *Ipmk*KD-induced DEGs that are regulated in the same manner (red,  
1285 clusters 1 and 5) or the opposite manner (green, clusters 2 and 4) upon *Ipmk*KD and *Smarb1*KD.  
1286 (J) Venn diagrams representing up-regulated DEGs (top) and down-regulated DEGs (bottom) in *Ipmk*KD  
1287 (orange) and *Smarb1*KD (blue) cells. The *P*-values indicate the significance of the overlap between the  
1288 two groups.

1289

1290 **Figure 7. Proposed model depicting the function of IPMK.**

1291 (A) A model displaying the physical interactions between IPMK and SMARCB1 (left). For these physical  
1292 interactions, the exons 3, 4, and 6 of IPMK (orange boxes) and the Rpt1 and Rpt2 (particularly N-terminal  
1293  $\beta$  sheets) domains of SMARCB1 (red boxes) are required. An additional model showing our speculation  
1294 on position of IPMK within the SWI/SNF complex, directly interacting with SMARCB1, BRG1, and  
1295 BAF155 (right).

1296 (B) In WT mESC (left), IPMK regulates appropriate BRG1 localization (probably via physical interaction  
1297 with various subunits of SWI/SNF complex) and chromatin accessibility at NFR (nucleosome free region)  
1298 of TSS. Upon *Ipmk* depletion (right), BRG1 localization is perturbed, resulting in decreased chromatin  
1299 accessibility at NFR of TSS.

1300

1301

1302 **Figure 1—figure supplement 1. Various subunits of SWI/SNF complex and histones are IPMK-**  
1303 **proximal/interacting proteins.**

1304 A volcano plot showing the relative abundance and significance ( $P$ -value) of biotinylated proteins related  
1305 to SWI/SNF complex, histones, and two negative controls (right). A dotted line within the volcano plot  
1306 indicates the  $P$ -value = 0.05. The relative abundance (abundance ratio) was derived by comparing the fold  
1307 enrichment of target proteins in IPMK-APEX2-expressed to APEX2-expressed HEK293 cells.  $P$ -value was  
1308 calculated using Student's  $t$ -test.

1309

1310 **Figure 2—figure supplement 1. IPMK physically binds to SMARCB1 and other subunits of the**  
1311 **SWI/SNF complex.**

1312 (A) IPMK and IgG were immunoprecipitated from NIH3T3 cells and subjected to immunoblotting.

1313 (B) IPMK and IgG were immunoprecipitated from NIH3T3 cells in the presence of dithiobis (succinimidyl  
1314 propionate) (DSP), an established crosslinker, and subjected to immunoblotting.

1315 (C) SMARCB1 and IgG were immunoprecipitated from wild-type (WT) and IPMK-depleted (KO) MEF  
1316 cells and subjected to immunoblotting.

1317 (D) E14Tg2a cells and NIH3T3 cells were non-transfected (NT) or transfected with siRNA against *Egfp*  
1318 (*Egfp*KD), *Ipmk* (*Ipmk*KD), and *Smrcb1* (*Smrcb1*KD), and then subjected to immunoblotting.

1319 (E) E14Tg2a cells were transfected with siRNA against *Egfp* (*Egfp*KD) and *Smrcb1* (*Smrcb1*KD),  
1320 immunoprecipitated with IPMK and IgG, and subjected to immunoblotting.

1321 (F) HEK293T cells were co-transfected with GST-IPMK and FLAG-SMARCB1 or FLAG (a control  
1322 vector), followed by FLAG immunoprecipitation and immunoblotting.

1323 (G) HEK293T cells were transfected with GST-IPMK or GST (a control vector), followed by GST pull-  
1324 down and immunoblotting.

1325 (H) Coomassie blue staining (left) and immunoblots of native SWI/SNF complex purified from FLAG-  
1326 DPF2 HEK293T cell line.

1327 (I) Native SWI/SNF complex purified from FLAG-DPF2 HEK293T cell line and purified GST-IPMK or  
1328 GST were co-incubated, followed by GST pull-down and immunoblotting (left). Coomassie blue staining  
1329 of purified GST and GST-IPMK proteins (right).

1330

1331 **Figure 3—figure supplement 1. Domain mapping of the interaction between IPMK and SMARCB1.**

1332 (A) IPMK and SMARCB1 domain interaction test in yeast strain AH109, containing the *HIS3* reporter gene.  
1333 Yeast cells were co-transformed with either the GAL4-BD fusion plasmid pGBKT7 or pGBKT7-IPMK and  
1334 the GAL4-AD fusion plasmid pGADT7 with SMARCB1 deletion constructs or pACT2-SMARCB1. IPMK  
1335 interacts with 99-245 or 99-319 SMARCB1 deletion constructs, whereas IPMK does not interact with 99-  
1336 185 SMARCB1 constructs. The yeast cells were spread on the selection medium lacking leucine and  
1337 tryptophan (SD-LW) to select co-transformants of bait and prey vectors. Specific interactions between bait  
1338 and prey proteins were monitored by cell growth on a selection medium lacking leucine, tryptophan, and  
1339 histidine (SD-LWH). 3-AT (3-amino-1,2,4-triazole) was used to suppress leaky *HIS3* expression in

1340 transformants to obtain an accurate phenotype. A schematic diagram of the SMARCB1 domain map with  
1341 the number of amino acid sequences is presented on the right. The IPMK-binding sites (Rpt1 and Rpt2) are  
1342 highlighted in red.

1343 (B, C, and D) HEK293T cells were co-transfected with FLAG-IPMK and GST (a control vector) or GST-  
1344 SMARCB1 Rpt1 fragments (B and D) and GST-SMARCB1 Rpt2 fragments (C and D), followed by  
1345 immunoprecipitation with FLAG antibody and subjected to immunoblotting. The specific IPMK-binding  
1346 Rpt1 (B) and Rpt2 (C) domains are highlighted in red. Arrows and cylinders indicate  $\beta$  sheets and  $\alpha$  helices,  
1347 respectively.

1348 (E) HEK293T cells were co-transfected with FLAG-IPMK and GST (a control vector), GST-SMARCB1,  
1349 or GST-SMARCB1 without Rpt1 and Rpt2 (GST- $\Delta$ 186-371), followed by immunoprecipitation with FLAG  
1350 antibody, and subjected to immunoblotting.

1351 (F) Schematic diagram of human SMARCB1 and SMARCB1 without Rpt1 and Rpt2 ( $\Delta$ 186-371). The  
1352 IPMK-binding sites (Rpt1 and Rpt2) are highlighted in red with the number of amino acid sequences.

1353

1354 **Figure 4—figure supplement 1. Chromatin fraction assay**

1355 (A) E14Tg2a cells were fractionated into the cytoplasm, nucleoplasm, and chromatin fractions.  
1356 Immunoblotting with IPMK, SMARCB1, and fractionation markers was then performed.

1357 (B) NIH3T3 cells were fractionated into the cytoplasm, nucleoplasm, and chromatin fractions.  
1358 Immunoblotting with IPMK, SMARCB1, and fractionation markers was then performed.

1359 (C) NIH3T3 cells were transfected with siRNA against *Egfp* (*Egfp*KD) and *Smarcb1* (*Smarcb1*KD) and  
1360 then fractionated into the cytoplasm, nucleoplasm, and chromatin fractions. Immunoblotting with IPMK,  
1361 SMARCB1, BRG1, and fractionation markers was then performed.

1362

1363 **Figure 5—figure supplement 1. IPMK plays an important role in the maintenance of chromatin**  
1364 **accessibility at promoter-TSS by regulating the BRG1 localization.**

1365 (A) Line plots showing the average enrichments of BRG1 (*Egfp*KD cells) at TSS with six clusters.

1366 (B) A diagram displaying six clusters of TSS classified by the relative positions of BRG1 CUT&RUN peaks  
1367 (*Egfp*KD cells) respective to TSS and up/downstream regions of TSS (left). Bar graphs showing the number  
1368 of six TSS clusters (right).

1369 (C) Line plots showing the average enrichments of BRG1 (*Egfp*KD cells) at TSS with three clusters.  
1370 ClusterC (red) contains cluster1-3, ClusterL (blue) contains cluster4-5, and ClusterR (green) resembles  
1371 cluster6.

1372 (D) A diagram displaying three clusters of TSS classified by the relative positions of BRG1 CUT&RUN  
1373 peaks (*Egfp*KD cells) respective to TSS and up/downstream regions of TSS (left). Bar graphs showing the  
1374 number of three TSS clusters (right).

1375 (E) Bar graphs showing the percentage of three TSS clusters exhibiting decreased (left) or increased (right)  
1376 BRG1 intensity upon *Ipmk*KD.

1377 (F) Bar graphs showing the percentage of three TSS clusters (TSS exhibiting decreased BRG1 intensity

1378 upon *Ipmk*KD) with H3K4me3-Only (left) and bivalent (right) promoters.  
1379 (G) Box plots showing the BRG1 intensity at TSS with two promoter types (top: H3K4me3-Only promoters;  
1380 bottom: bivalent promoters) and with three TSS clusters in *Egfp*KD (grey) and *Ipmk*KD (red) cells. *P*-  
1381 values were derived using Wilcoxon signed rank test (\* $P < 1 \times 10^{-25}$ ; \*\* $P < 1 \times 10^{-50}$ ; \*\*\* $P < 1 \times 10^{-100}$ ).  
1382 (H) Bar graphs showing the average of differential ATAC-seq intensity ( $\text{Log}_2$  KD/*Egfp*KD) upon *Ipmk*KD  
1383 (blue) and *Brg1*KD (green) at three TSS clusters with H3K4me3-Only (left) and bivalent promoters (right).  
1384 (I) Bar graphs showing the average of differential mRNA expression ( $\text{Log}_2$  *Ipmk*KD/*Egfp*KD) upon  
1385 *Ipmk*KD at TSS (TSS exhibiting decreased BRG1 intensity upon *Ipmk*KD) with two promoter types.  
1386 (H and I) *P*-values were derived using Wilcoxon signed rank test (\* $P < 0.01$ ; \*\* $P < 1 \times 10^{-4}$ ; \*\*\* $P < 1 \times 10^{-10}$ ;  
1387 ns, not significant).

1388

1389 **Figure 6—figure supplement 1. mRNA transcriptome indicates that IPMK and SMARCB1 regulate**  
1390 **a common set of genes.**

1391 (A) Bar graphs (left: *P*-value, right: *Q*-value) showing the gene ontology terms (biological process) of the  
1392 Cluster1 (top) and Cluster5 (bottom) DEGs that satisfied the threshold (*P*-value  $\leq 0.005$ ). Organ. denotes  
1393 organization, and the dotted lines denote *P*-value  $\leq 0.005$  (left) and *Q*-value  $\leq 0.01$  (right).

1394 (B) Volcano plots showing the differentially expressed genes (DEGs) upon *Ipmk*KD (left) and *Smarcb1*KD  
1395 (right) in NIH3T3 cells, identified based on mRNA-seq data. Red and blue dots indicate DEGs that were  
1396 found to be significantly up- and down-regulated, respectively (*P*-value  $\leq 0.05$  and fold change  $\geq 1.5$ ).

1397 (C) Heatmaps representing differential gene expression ( $\text{log}_2$  (KD/*Egfp*KD)) of up-regulated (clusters 1, 2,  
1398 and 3) and down-regulated (clusters 4, 5, and 6) DEGs upon *Ipmk*KD. The heatmaps are classified into six  
1399 clusters based on the differential gene expression of *Ipmk*KD and *Smarcb1*KD cells.

1400 (D) Pie chart showing the proportion of *Ipmk*KD-induced DEGs that are regulated in the same manner (red,  
1401 clusters 1 and 5) or the opposite manner (green, clusters 2 and 4) upon *Ipmk*KD and *Smarcb1*KD.

1402 (E) Venn diagrams representing up-regulated DEGs (top) and down-regulated DEGs (bottom) in *Ipmk*KD  
1403 (orange) and *Smarcb1*KD (blue) cells. The *P*-values indicate the significance of the overlap between the  
1404 two groups.

1405

1406 **Figure 7—figure supplement 1. Proposed model depicting the physical interaction of IPMK and**  
1407 **nucleosome-bound SWI/SNF complex.**

1408 An additional model showing our speculation on position of IPMK within the SWI/SNF complex in the  
1409 presence of nucleosomes.

1410

1411

1412 **Supplementary Table 1. Yeast two-hybrid screening assay using IPMK as bait**

1413

1414 **Supplementary Table 2. Enriched protein complex-based sets from APEX2-mediated proximity**  
1415 **labeling**

1416

1417 **Supplementary Table 3. Clustering analysis of DEG in mouse embryonic stem cells**

1418

1419 **Supplementary Table 4. Clustering analysis of DEG in mouse fibroblasts**

1420

1421



Figure 1

**A**

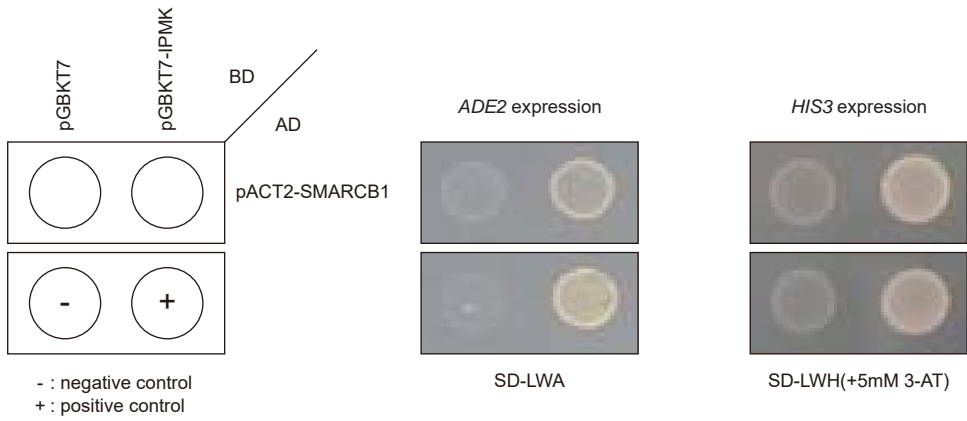

**B**

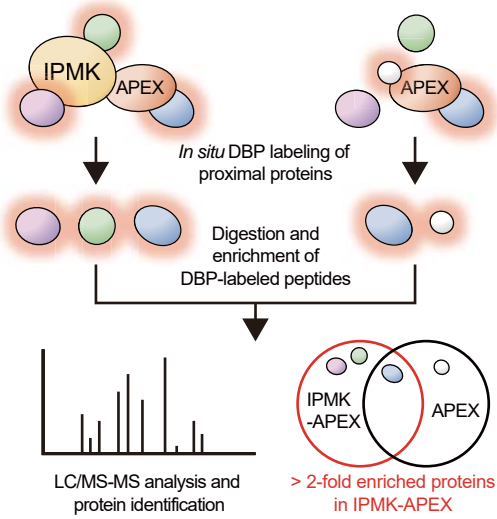

**C**

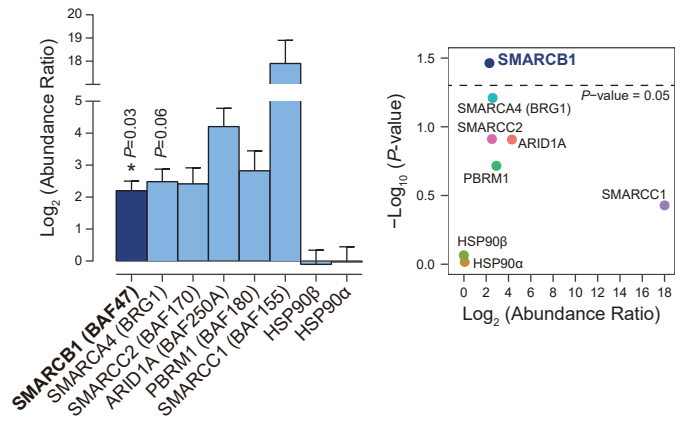

Figure 2

**A**

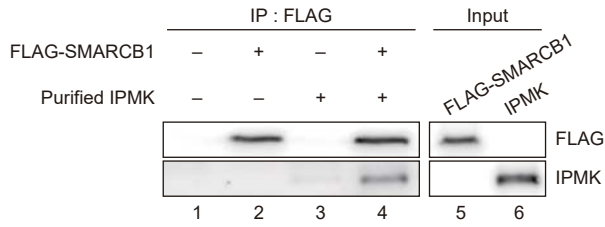

**B**

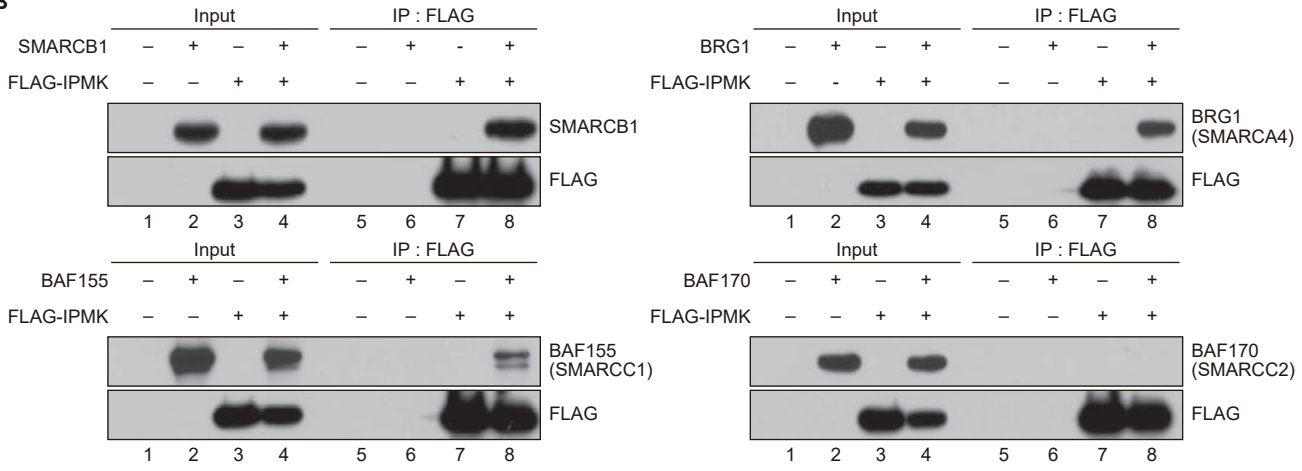

**C**

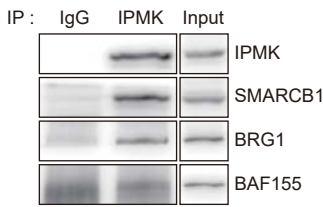

**D**

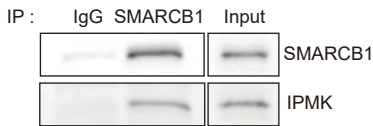

**E**

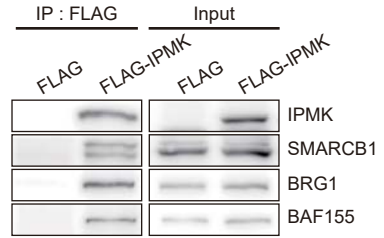

**F**

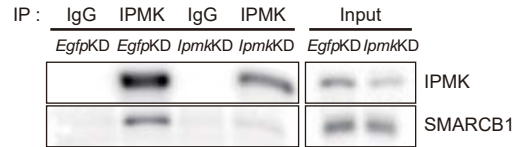

Figure 3

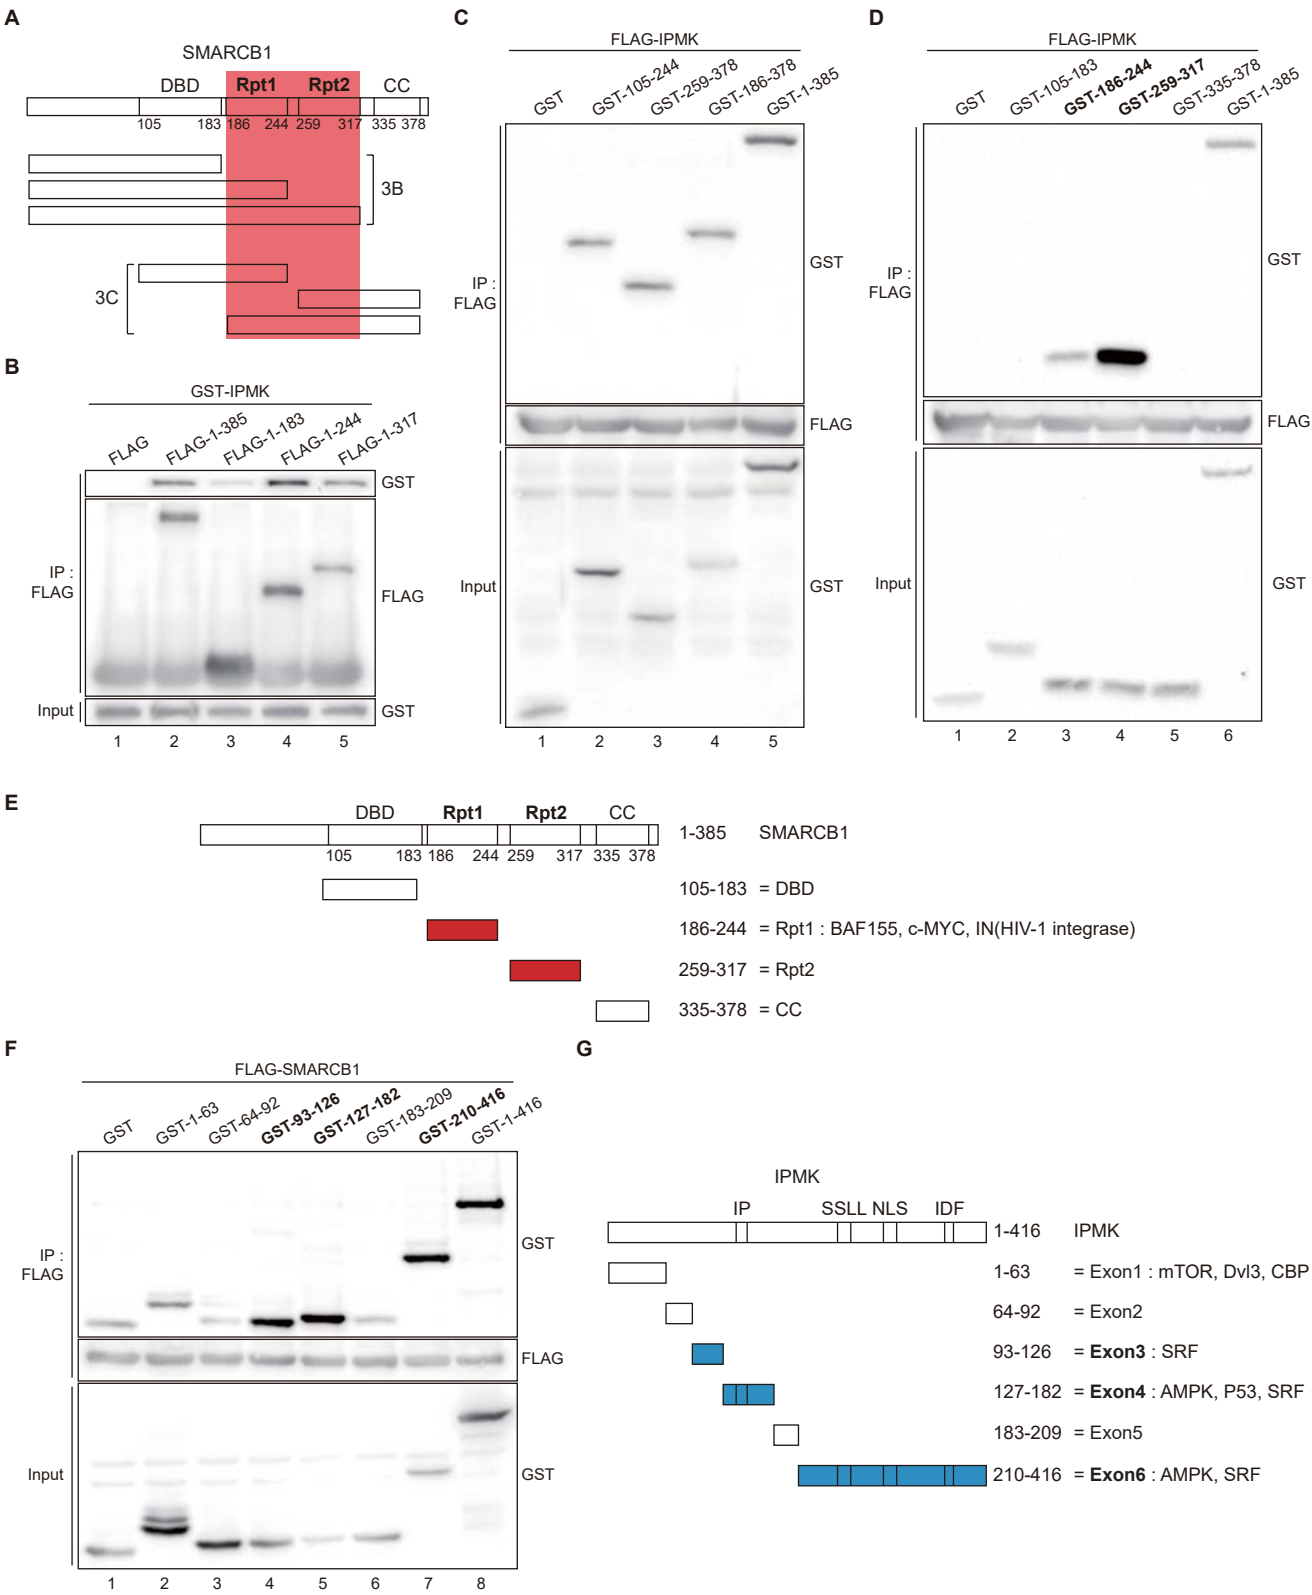

Figure 4

**A**

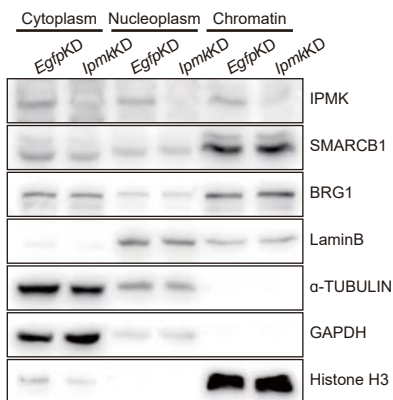

**B**

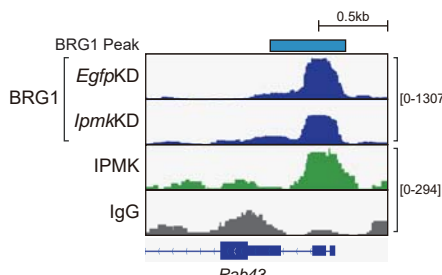

**C**

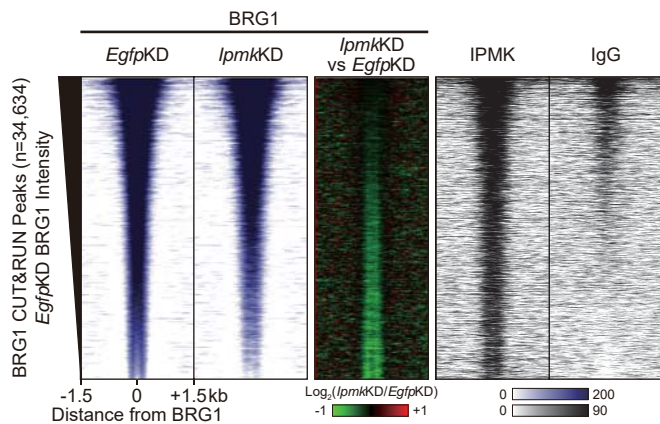

**D**

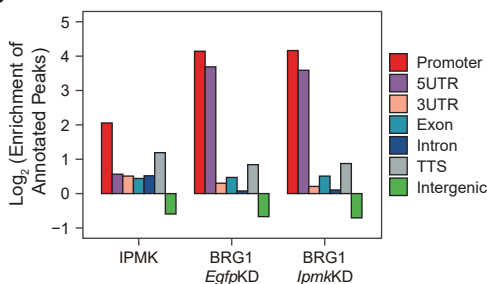

**E**

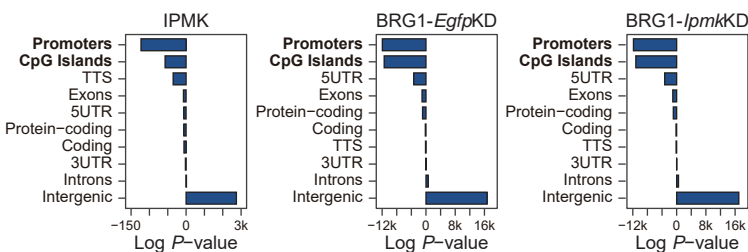

**F**

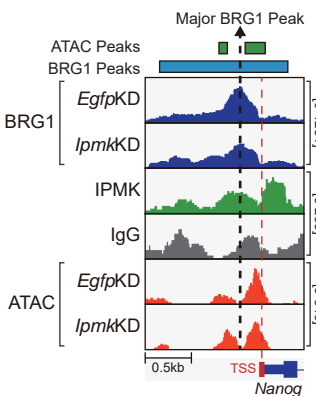

**G**

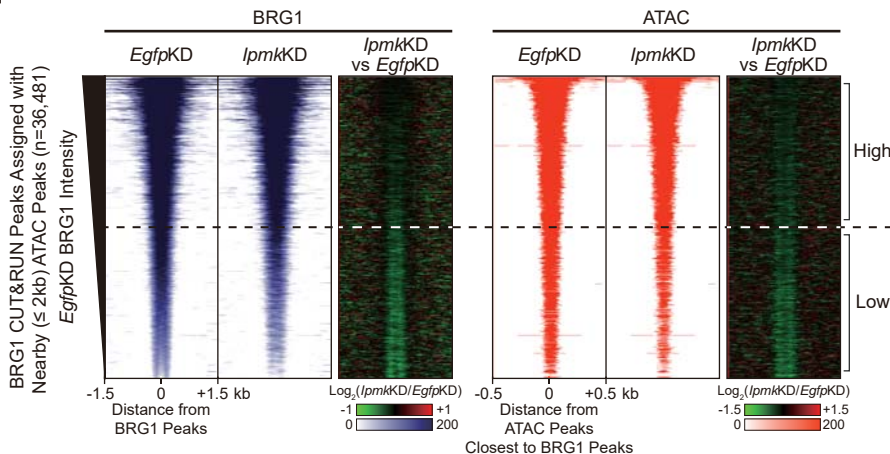

**H**

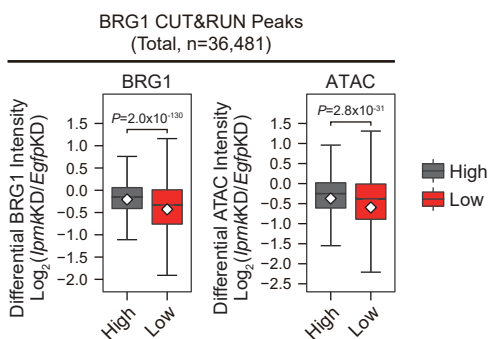

**I**

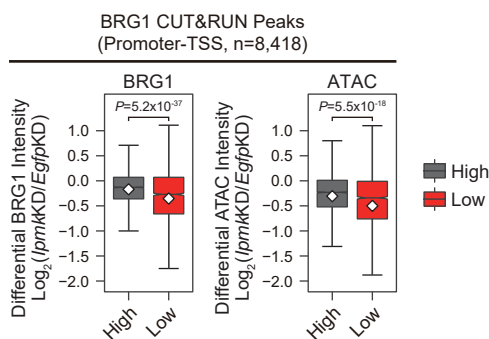

Figure 5

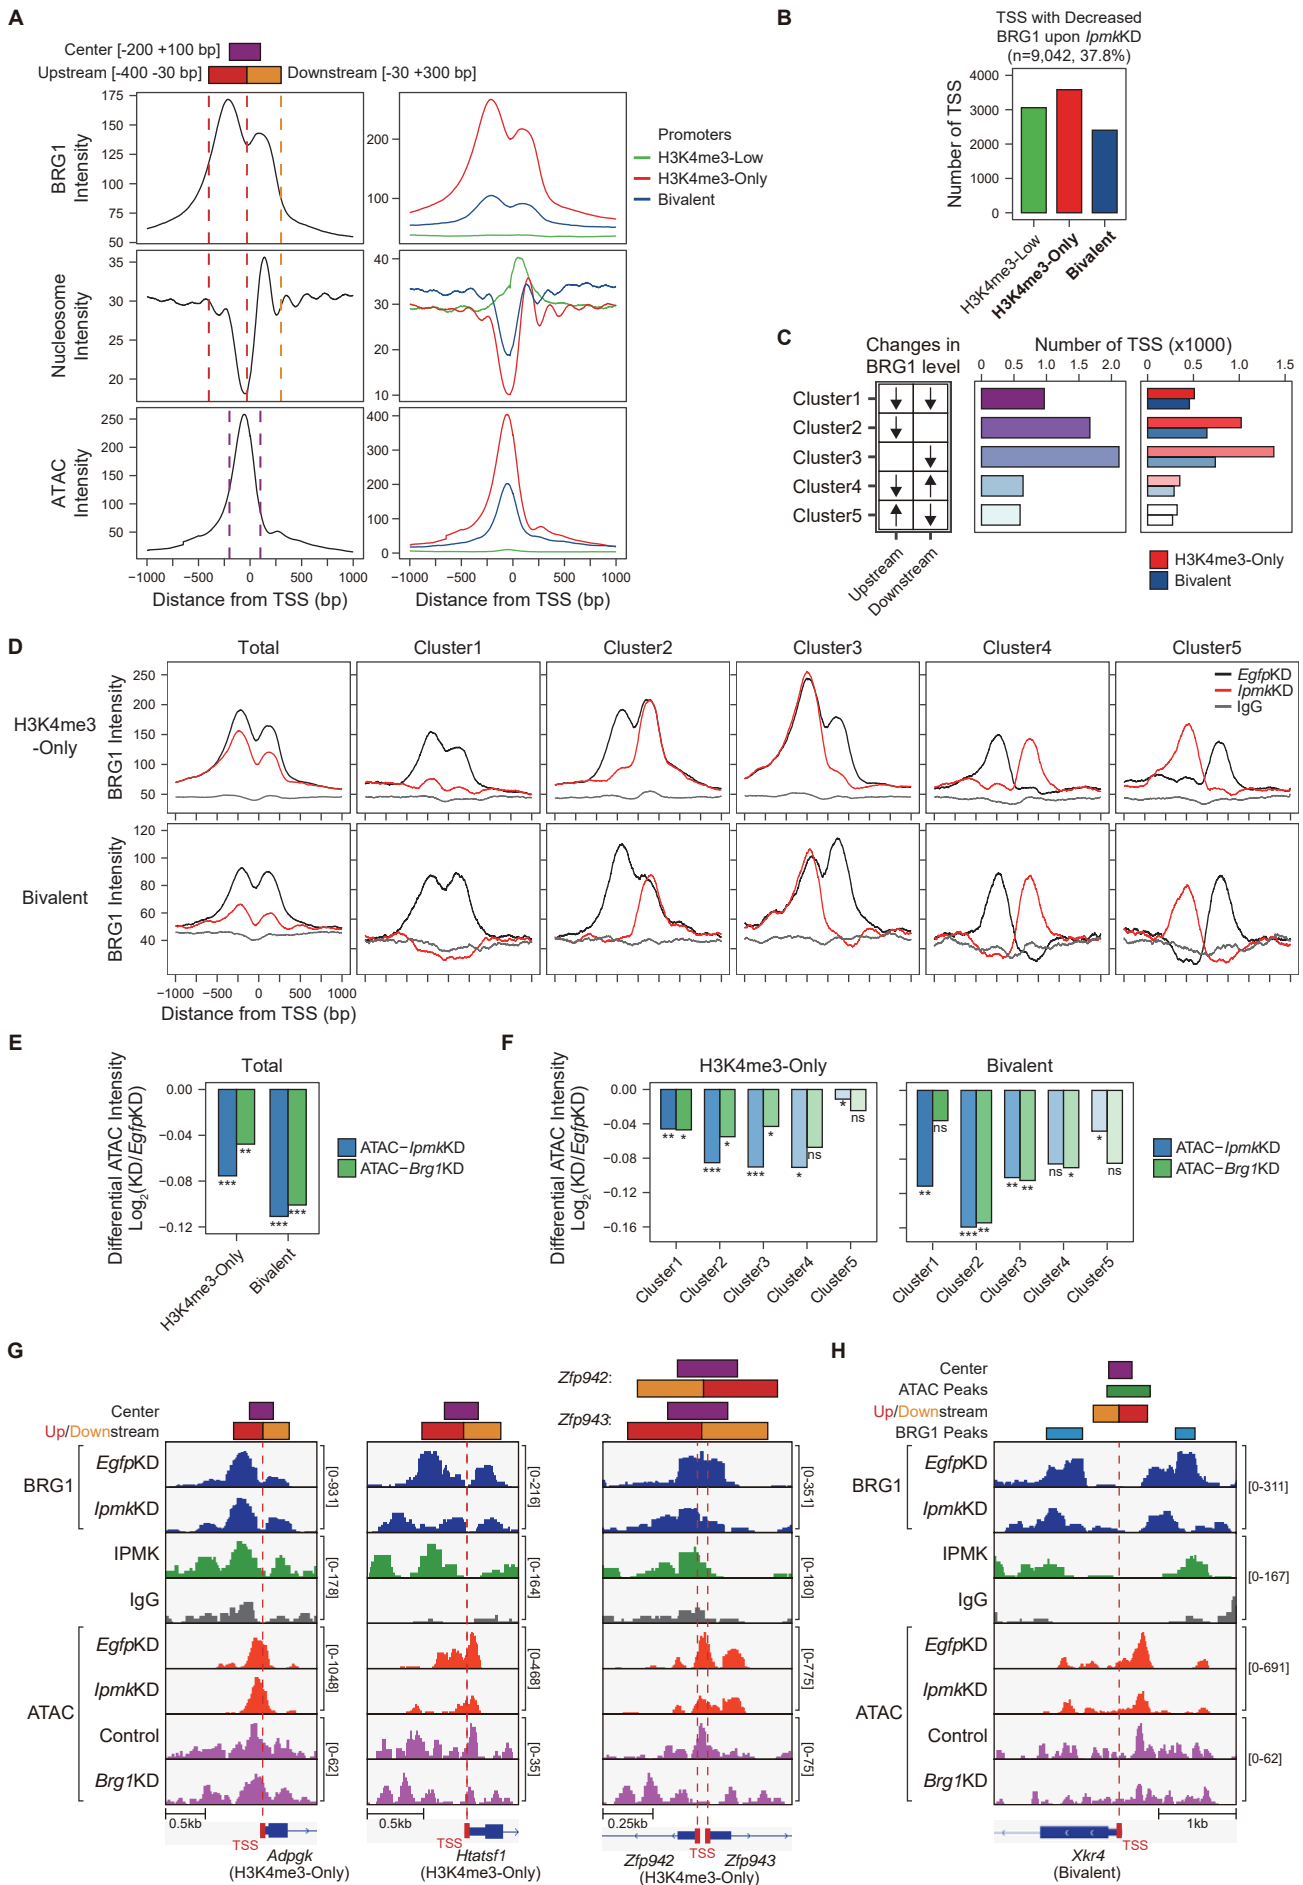

Figure 6

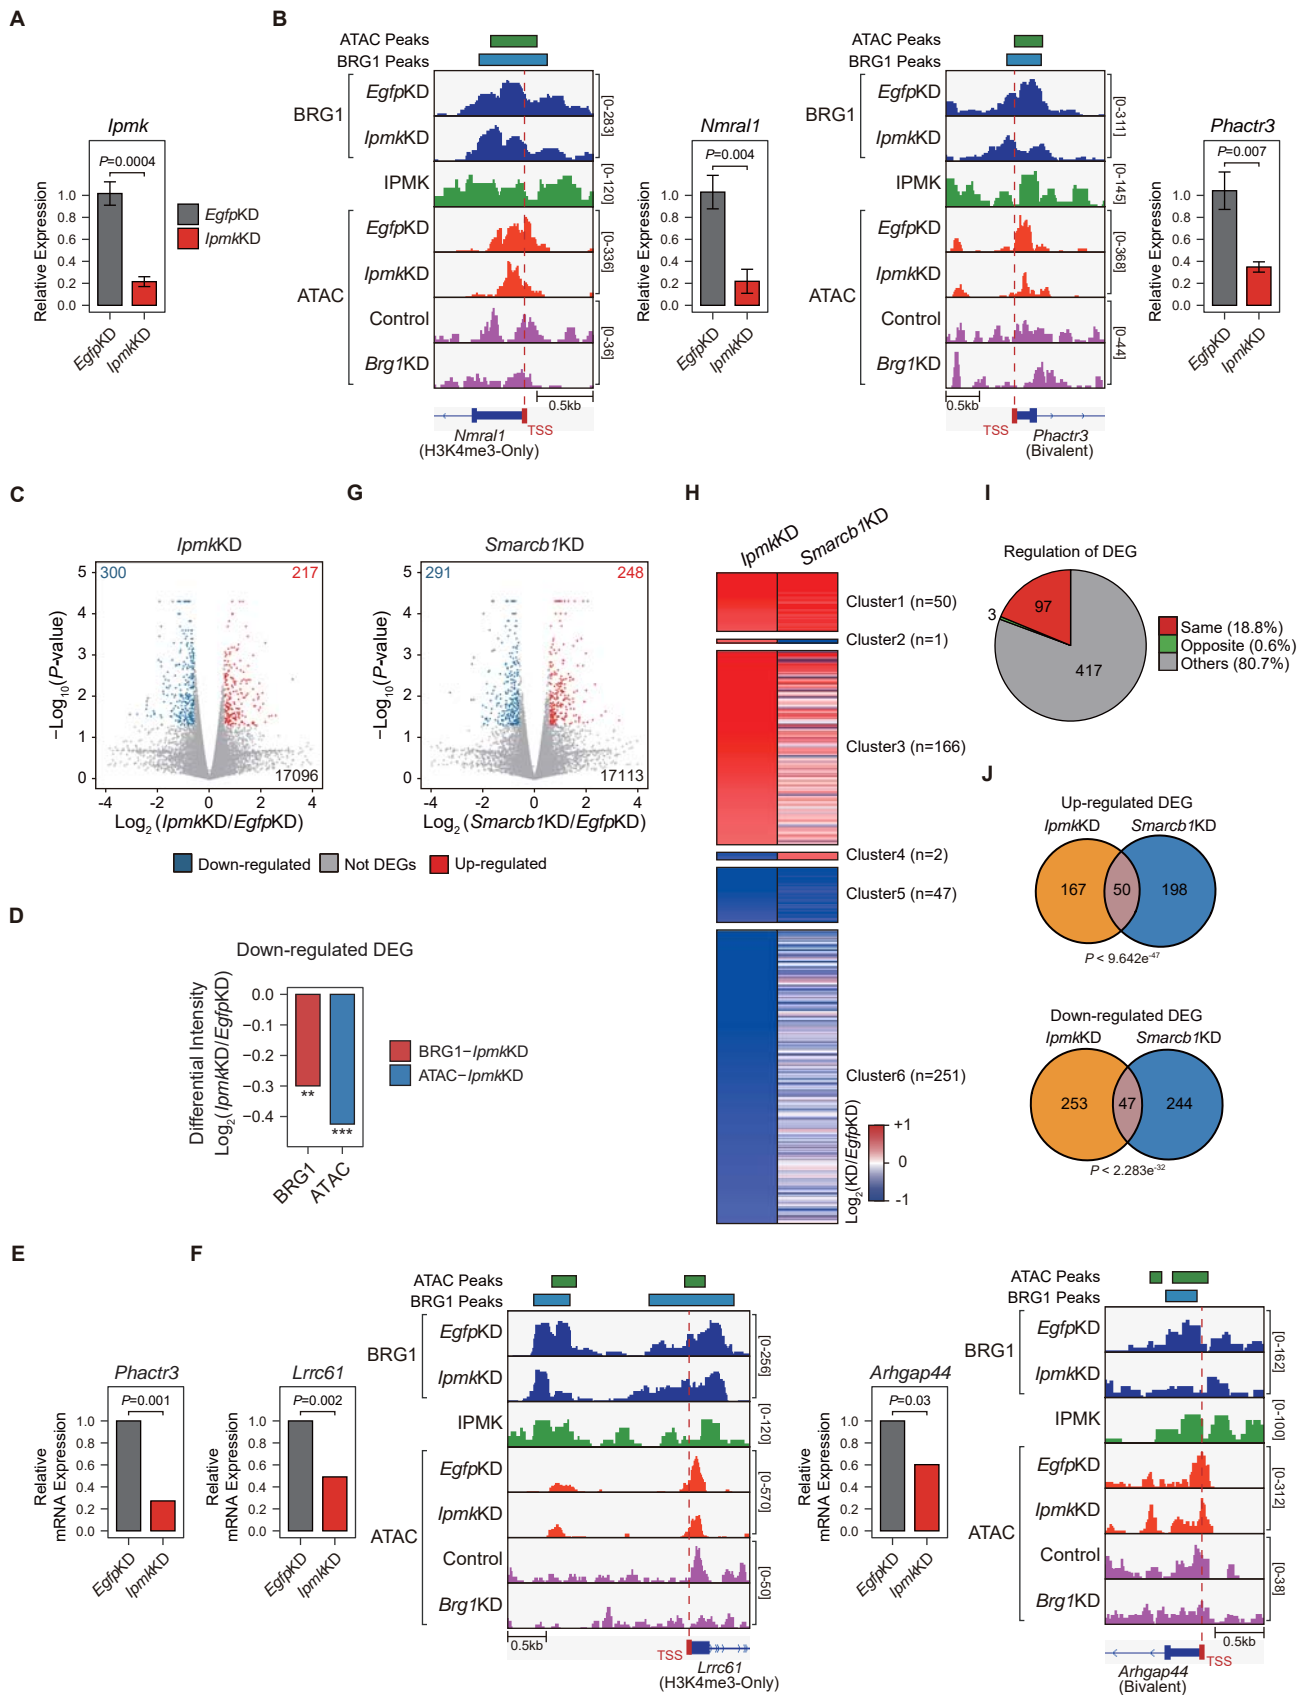

Figure 7

A

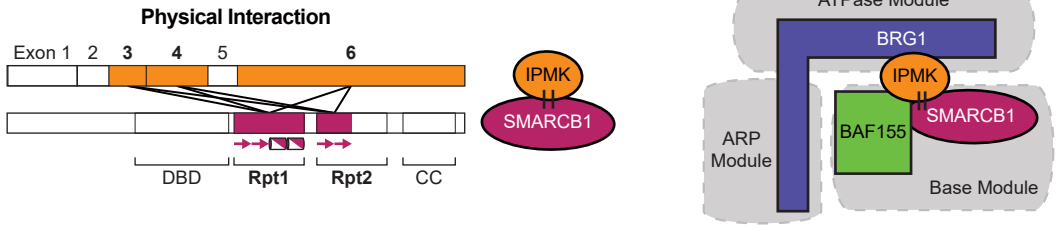

B

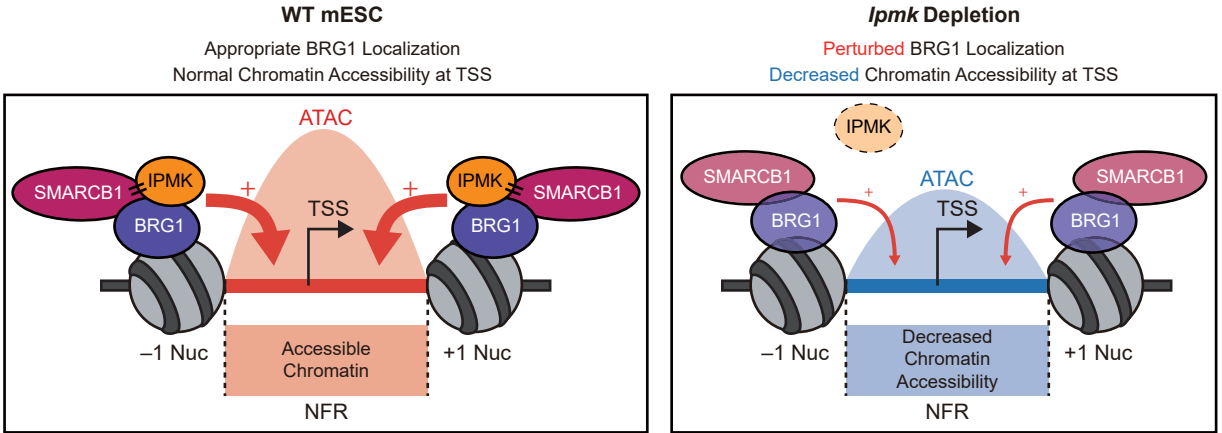

Figure 1—figure supplement 1

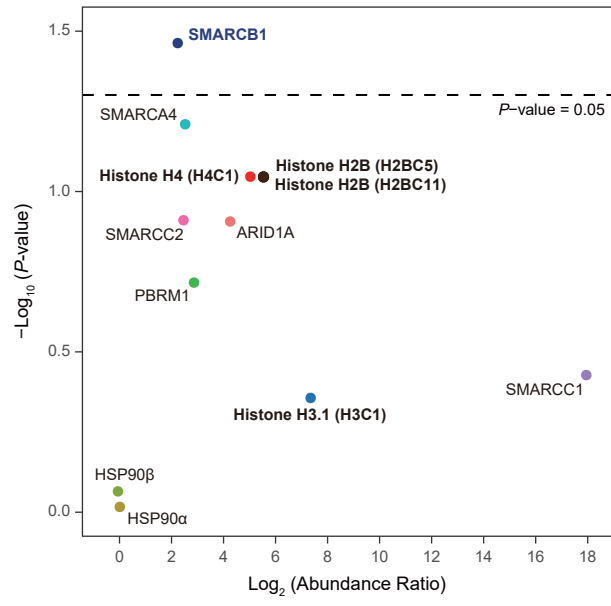



Figure 2—figure supplement 1

**A**

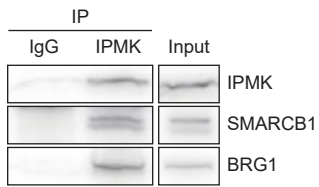

**B**

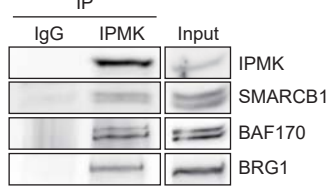

**C**

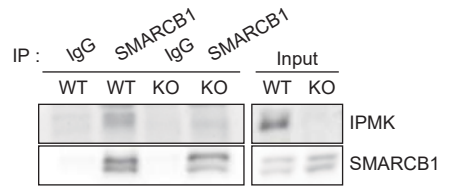

**D**

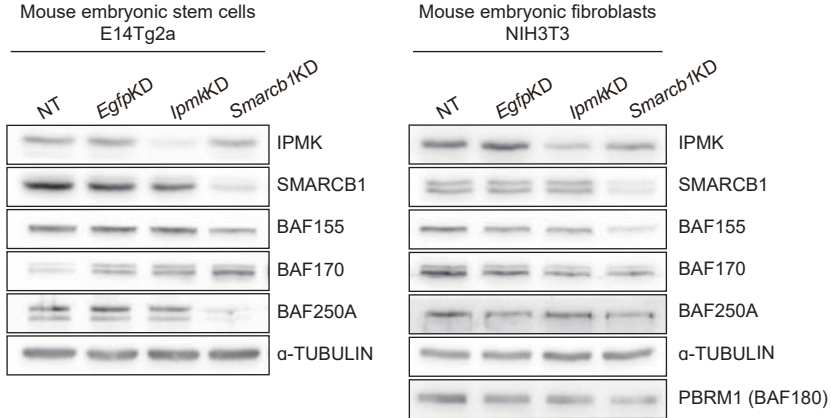

**E**

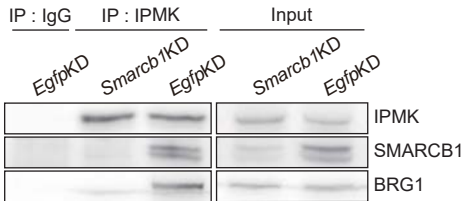

**F**

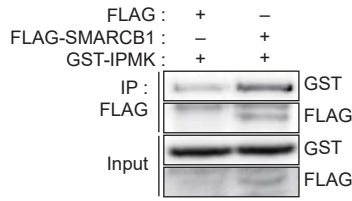

**G**

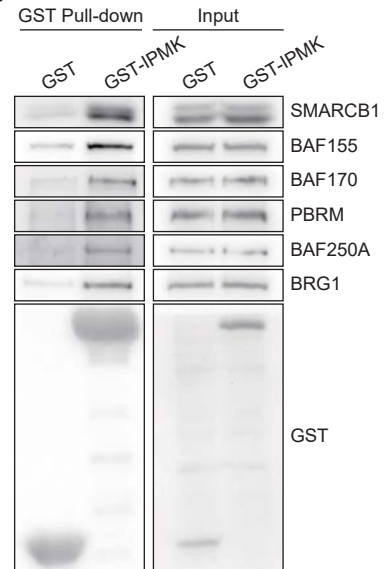

**H**

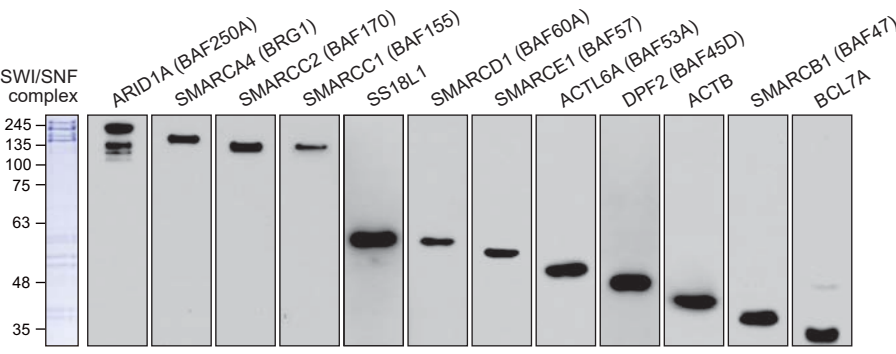

**I**

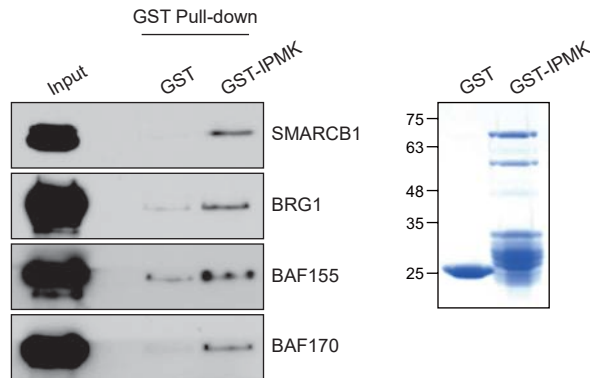

**A**

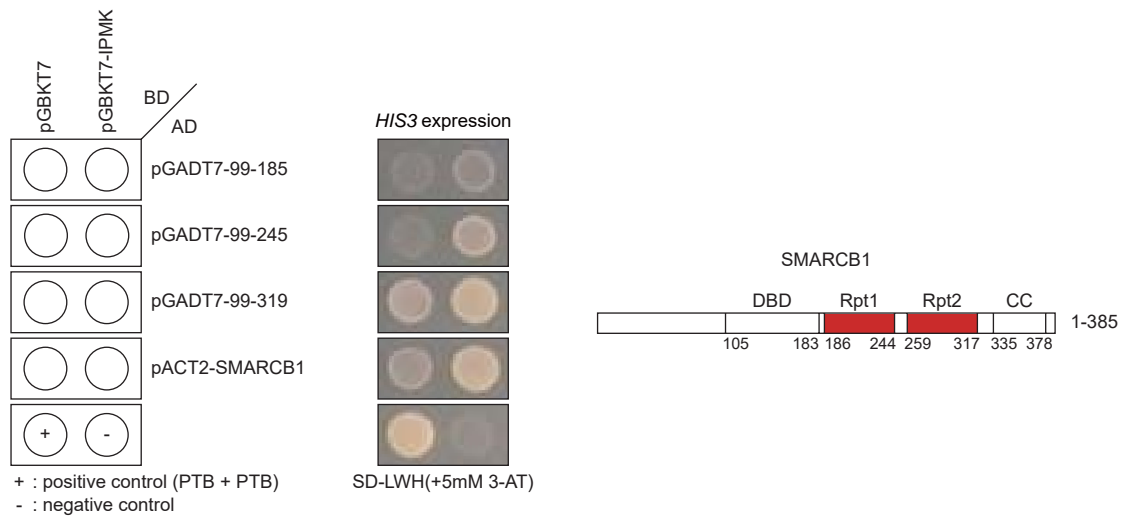

**B**

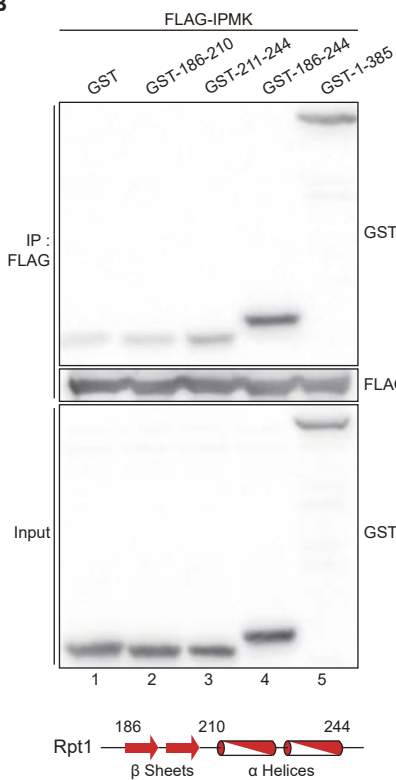

**C**

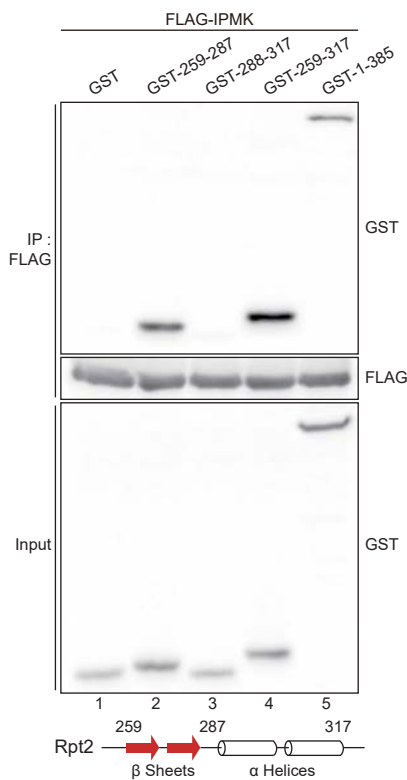

**D**

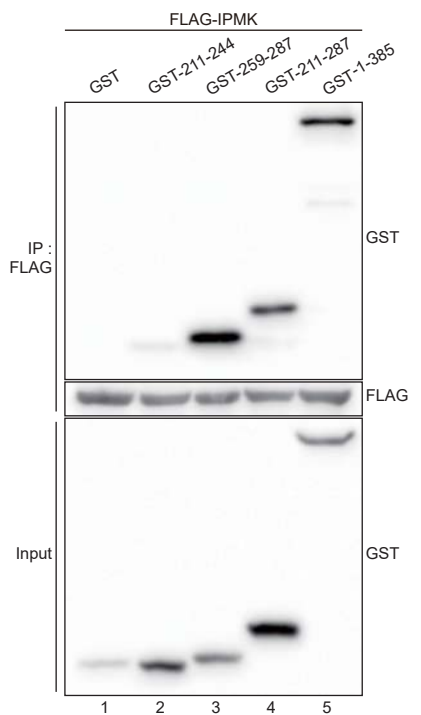

**E**

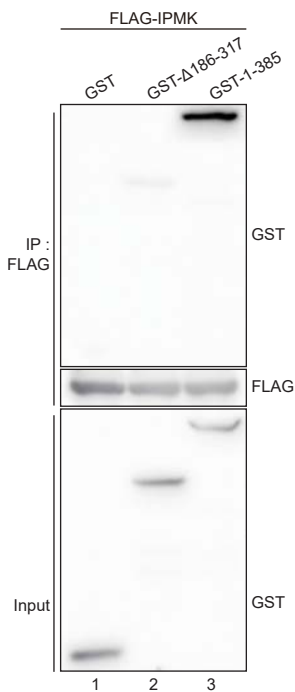

**F**

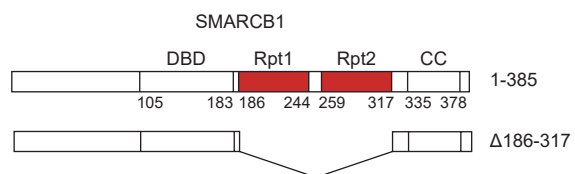

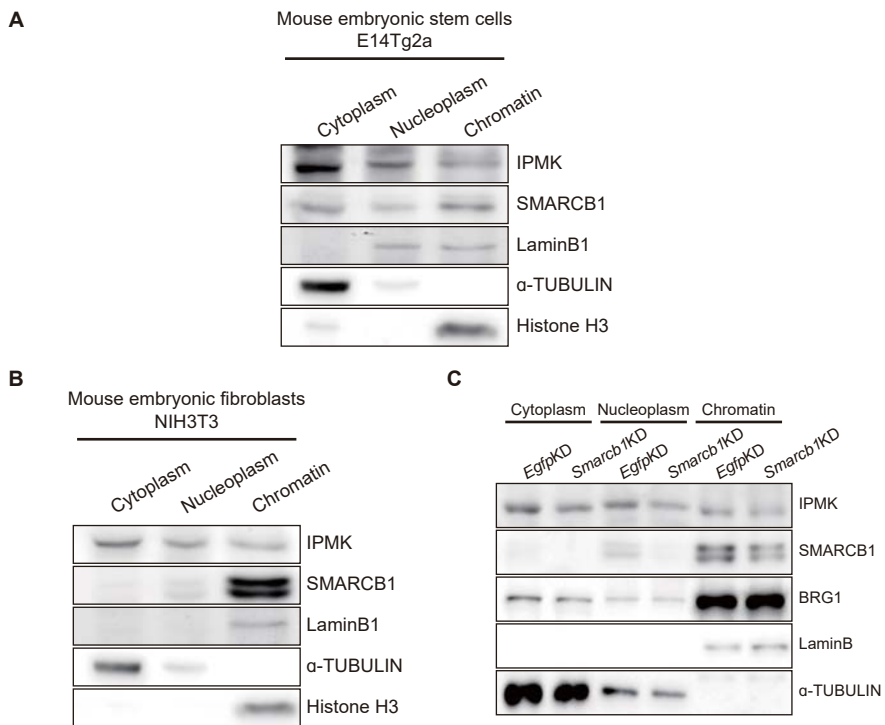

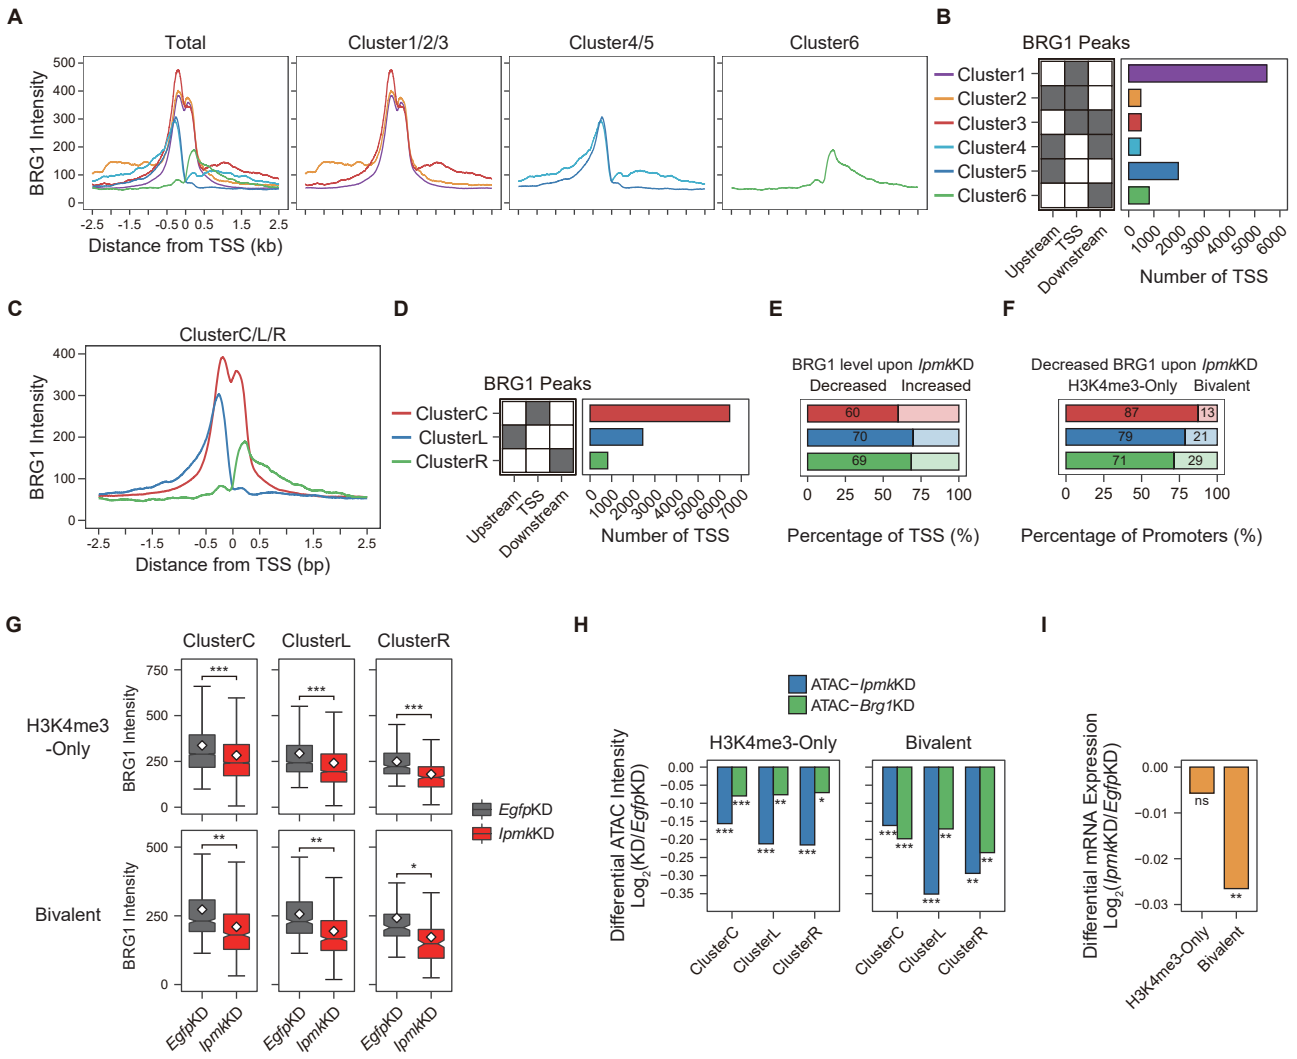

Figure 6—figure supplement 1

**A**

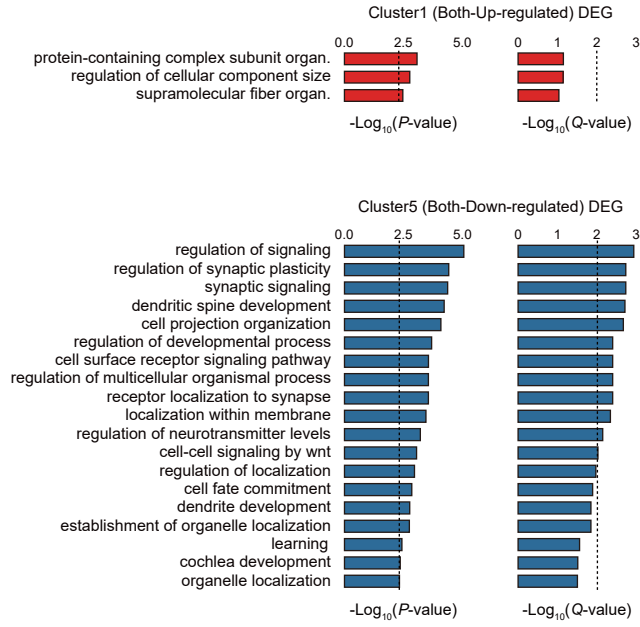

**B**

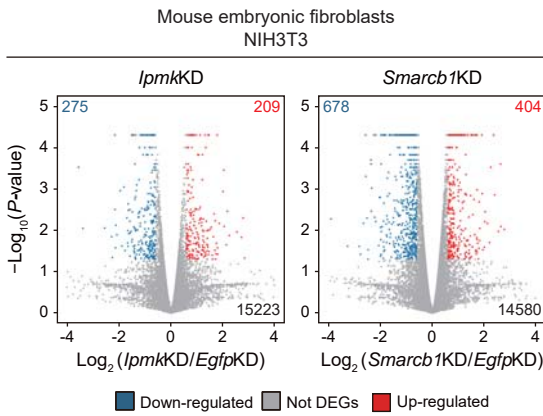

**C**

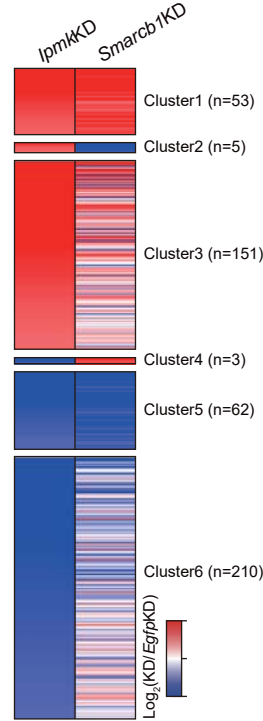

**D**

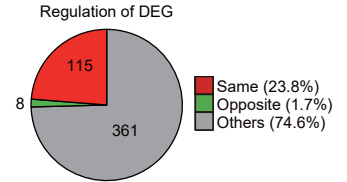

**E**

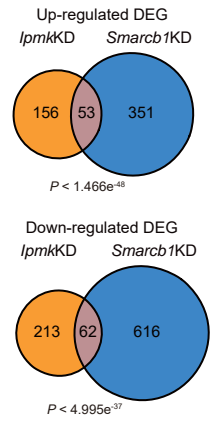

Figure 7—figure supplement 1

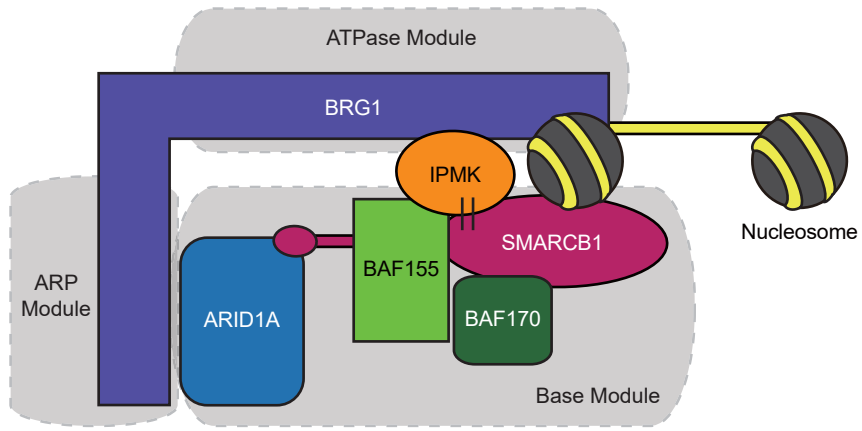

Supplementary Table 1. Yeast two-hybrid screening assay using IPMK as bait

| No. | Gene Symbol    | Description                                                                                       | GenBank      |
|-----|----------------|---------------------------------------------------------------------------------------------------|--------------|
| 1   | CLU            | Clusterin                                                                                         | NM_001831    |
| 2   | HSPD1          | Heat Shock 60kDa Protein 1 (Chaperonin)                                                           | NM_199440    |
| 3   | PSMD2          | Proteasome (Prosome, Macropain) 26S Subunit, non-ATPase, 2                                        | NM_002808    |
| 4   | PCDHGC4        | Protocadherin Gamma Subfamily C, 4                                                                | NM_018928    |
| 5   | KHDRBS1        | KH Domain Containing, RNA Binding, Signal Transduction Associated 1                               | NM_006559    |
| 6   | <b>SMARCB1</b> | SWI/SNF Related, Matrix Associated, Actin Dependent Regulator of Chromatin, Subfamily b, Member 1 | NM_001007468 |
| 7   | CTSD           | Cathepsin D                                                                                       | NM_001909    |
| 8   | CYP46A1        | Cytochrome P450, Family 46, Subfamily A, Polypeptide 1                                            | NM_006668    |
| 9   | RNF208         | Ring Finger Protein 208                                                                           | NM_031297    |
| 10  | SPARCL1        | SPARC-like 1 (hevin)                                                                              | NM_004684    |
| 11  | COL11A2        | Collagen, Type XI, Alpha 2                                                                        | NM_080681    |
| 12  | TNRC6B         | Trinucleotide Repeat Containing 6B                                                                | NM_001162501 |
| 13  | DLG4           | Discs, Large Homolog 4                                                                            | NM_001128827 |
| 14  | RBM5           | RNA Binding Motif Protein 5                                                                       | NM_005778    |
| 15  | ATRX           | Alpha Thalassemia/Mental Retardation Syndrome X-linked                                            | NM_138270    |
| 16  | GAPDH          | Glyceraldehyde-3-phosphate Dehydrogenase                                                          | NM_001256799 |
| 17  | B4GALNT1       | Beta-1,4-N-acetyl-galactosaminyl Transferase 1                                                    | NM_001478    |
| 18  | DRG2           | Developmentally Regulated GTP Binding Protein 2                                                   | NM_001388    |
| 19  | PLD3           | Phospholipase D Family, Member 3                                                                  | NM_012268    |
| 20  | GLUL           | Glutamate-ammonia Ligase                                                                          | NM_001033056 |
| 21  | APLP1          | Amyloid Beta (A4) Precursor-like Protein 1                                                        | NM_005166    |
| 22  | SEPT4          | Septin 4                                                                                          | NM_004574    |
| 23  | PSMF1          | Proteasome (Prosome, Macropain) Inhibitor Subunit 1 (PI31)                                        | NM_178578    |

| No. | Gene Symbol    | Description                                                                                       | GenBank      |
|-----|----------------|---------------------------------------------------------------------------------------------------|--------------|
| 1   | ENO2           | Enolase 2 (Gamma, Neuronal)                                                                       | NM_001975    |
| 2   | MAP1A          | Microtubule-associated Protein 1A                                                                 | NM_002373    |
| 3   | WSCD2          | WSC Domain Containing 2                                                                           | NM_014653    |
| 4   | MIF4GD         | MIF4G Domain Containing                                                                           | NM_001242501 |
| 5   | HTRA2          | HtrA Serine Peptidase 2                                                                           | NM_013247    |
| 6   | ATP5D          | ATP Synthase, H+ Transporting, Mitochondrial F1 Complex, Delta Subunit                            | NM_001001975 |
| 7   | ACTB           | Actin, Beta                                                                                       | NM_001101    |
| 8   | NEURL          | Neuralized Homolog (Drosophila)                                                                   | NM_004210    |
| 9   | SWI5           | SWI5 Recombination Repair Homolog (yeast)                                                         | NM_001040011 |
| 10  | GPANK1         | G Patch Domain and Ankyrin Repeats 1                                                              | NM_001199240 |
| 11  | SLIT3          | Slit Homolog 3 (Drosophila)                                                                       | NM_003062    |
| 12  | BAI2           | Brain-specific Angiogenesis Inhibitor 2                                                           | NM_001703    |
| 13  | TNNI3K         | TNNI3 Interacting Kinase                                                                          | NM_015978    |
| 14  | <b>SMARCB1</b> | SWI/SNF Related, Matrix Associated, Actin Dependent Regulator of Chromatin, Subfamily b, Member 1 | NM_001007468 |
| 15  | YBX2           | Y box binding protein 2                                                                           | NM_015982    |
| 16  | PSMD8          | Proteasome (Prosome, Macropain) 26S Subunit, non-ATPase, 8                                        | NM_002812    |
| 17  | MDH1           | Malate Dehydrogenase 1, NAD (soluble)                                                             | NM_001199112 |
| 18  | SEPT8          | Septin 8                                                                                          | NM_001098812 |
| 19  | RPLP0          | Ribosomal Protein, Large, P0                                                                      | NM_001002    |
| 20  | YWHAH          | Tyrosine 3-Monooxygenase/Tryptophan 5-Monooxygenase Activation Protein, Eta Polypeptide           | NM_003405    |
| 21  | FEZ2           | Fasciculation And Elongation Protein Zeta 2 (Zygin II)                                            | NM_001042548 |
| 22  | EHMT2          | Euchromatic Histone-Lysine N-Methyltransferase 2                                                  | NM_025256    |
| 23  | ACTA2          | Actin, Alpha 2, Smooth Muscle, Aorta                                                              | NM_001613    |
| 24  | PGLS           | 6-Phosphogluconolactonase                                                                         | NM_012088    |
| 25  | FAM3A          | Family With Sequence Similarity 3, Member A                                                       | NM_001171132 |
| 26  | NFS1           | NFS1 Nitrogen Fixation 1 Homolog (S. cerevisiae)                                                  | NM_001198989 |
| 27  | MPP1           | Membrane Protein, Palmitoylated 1, 55kD                                                           | NM_001166462 |
| 28  | SGSH           | N-Sulfoglucosamine Sulfohydrolase                                                                 | NM_000199    |
| 29  | FAM3C          | Family With Sequence Similarity 3, Member C                                                       | NM_001040020 |
| 30  | TNC            | Tenascin C                                                                                        | NM_002160    |
| 31  | COASY          | CoA Synthase                                                                                      | NM_001042532 |
| 32  | GFAP           | Glial Fibrillary Acidic Protein                                                                   | NM_001242376 |
| 33  | HNRNPH1        | Heterogeneous Nuclear Ribonucleoprotein H1 (H)                                                    | NM_001257293 |
| 34  | NEUROD2        | Neuronal Differentiation 2                                                                        | NM_006160    |
| 35  | TARS2          | Sapiens Threonyl-tRNA Synthetase 2                                                                | NM_025150    |
| 36  | BAI3           | Brain-specific Angiogenesis Inhibitor 3                                                           | NM_001704    |

Supplementary Table 2. Enriched protein complex-based sets from APEX2-mediated proximity labeling

| Complex name                                            | Set size | Candidates contained | q-value     |
|---------------------------------------------------------|----------|----------------------|-------------|
| BRG1-SIN3A-HDAC containing SWI/SNF remodeling complex I | 11       | 7 (63.6%)            | 4.83E-07    |
| BRG1-SIN3A complex                                      | 14       | 7 (50.0%)            | 4.00E-06    |
| Brg1-associated complex II                              | 7        | 5 (71.4%)            | 1.60E-05    |
| BRG1-associated complex                                 | 9        | 5 (55.6%)            | 6.98E-05    |
| BAF complex                                             | 9        | 5 (55.6%)            | 6.98E-05    |
| PBAF complex (Polybromo- and BAF containing complex)    | 9        | 5 (55.6%)            | 6.98E-05    |
| BRM-SIN3A complex                                       | 15       | 6 (40.0%)            | 8.10E-05    |
| EBAFa complex                                           | 10       | 5 (50.0%)            | 0.000104312 |
| BAF complex                                             | 13       | 5 (38.5%)            | 0.000329586 |
| Brg1-based SWI/SNF complex                              | 4        | 3 (75.0%)            | 0.000720336 |
| EBAFb complex                                           | 10       | 4 (40.0%)            | 0.001110216 |
| BRM-associated complex                                  | 10       | 4 (40.0%)            | 0.001110216 |



Supplementary Table 3. Clustering analysis of DEG in mouse embryonic stem cells

| <i>lpmk</i> KD | <i>Smarca1</i> KD | Number of genes | Percentage |
|----------------|-------------------|-----------------|------------|
| Up-regulated   | Up-regulated      | 50              | 23.0%      |
|                | Down-regulated    | 1               | 0.5%       |
|                | Not DEGs          | 166             | 76.5%      |
| Down-regulated | Up-regulated      | 2               | 0.7%       |
|                | Down-regulated    | 47              | 15.7%      |
|                | Not DEGs          | 251             | 83.7%      |

Supplementary Table 4. Clustering analysis of DEG in mouse fibroblasts

| <i>lpmk</i> KD | <i>Smarca1</i> KD | Number of genes | Percentage |
|----------------|-------------------|-----------------|------------|
| Up-regulated   | Up-regulated      | 53              | 24.4%      |
|                | Down-regulated    | 5               | 2.3%       |
|                | Not DEGs          | 151             | 69.6%      |
| Down-regulated | Up-regulated      | 3               | 1.0%       |
|                | Down-regulated    | 62              | 20.7%      |
|                | Not DEGs          | 210             | 70.0%      |
